# Supplementary material for: Identification of Pathways Mediating Growth Differentiation Factor5-Induced Tenogenic Differentiation in Human Bone Marrow Stromal Cells
Source: PubMed Central journal article supplement (PMC4631504; doi:10.1371/journal.pone.0140869), 2015-11-03
Supplement: pone.0140869.s002.pdf [file pone.0140869.s002.pdf]

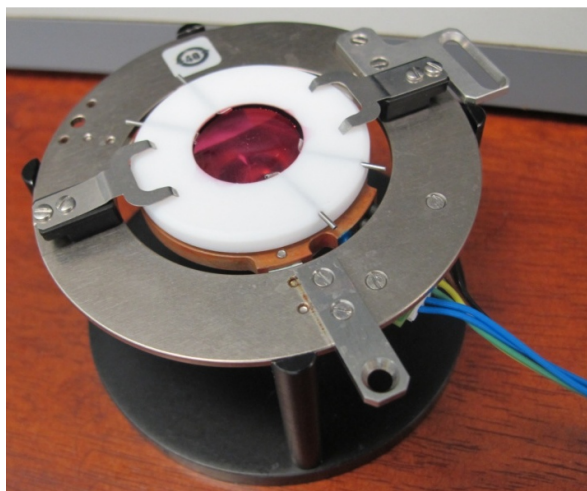

**S2 Fig. Closed cell incubation sample plate for atomic force microscopy imaging.** The closed cell incubation sample plate was used to incubate the cells during the entire imaging process.
