# Supplementary material for: Identification of Pathways Mediating Growth Differentiation Factor5-Induced Tenogenic Differentiation in Human Bone Marrow Stromal Cells
Source: PubMed Central journal article supplement (PMC4631504; doi:10.1371/journal.pone.0140869), 2015-11-03
Supplement: pone.0140869.s005.pdf [file pone.0140869.s005.pdf]

**S1 Table. Basic demographics and the origin of tissue samples for hMSCs cultures from the donors.**

| Donor      | Age (year) | Gender | Sampling Site          | Experiments                                                                                                            |
|------------|------------|--------|------------------------|------------------------------------------------------------------------------------------------------------------------|
| 10 (h78)   | 63         | Female | Bone marrow from femur | For <i>in vitro</i> tenogenic differentiation with GDF-5 induction in hMSC (microarray analysis) and imaging analysis. |
| 11 (h79)   | 53         | Female | Bone marrow from tibia |                                                                                                                        |
| 12 (h74)   | 75         | Female | Bone marrow from tibia |                                                                                                                        |
| 13 (h76)   | 62         | Female | Bone marrow from tibia |                                                                                                                        |
| 14 (h83)   | 85         | Female | Bone marrow from femur |                                                                                                                        |
| 15 (h90)   | 65         | Female | Bone marrow from tibia |                                                                                                                        |
| 16 (02h23) | 21         | Male   | Hamstring tendon       | As positive control for <i>in vitro</i> tenogenic differentiation of hMSC (microarray analysis) and imaging analysis.  |
| 17 (02h16) | 20         | Male   | Hamstring tendon       |                                                                                                                        |
| 18 (02h27) | 29         | Female | Hamstring tendon       |                                                                                                                        |
| 19 (02h33) | 26         | Male   | Hamstring tendon       |                                                                                                                        |
| 20 (02h07) | 23         | Male   | Hamstring tendon       |                                                                                                                        |
| 21 (02h17) | 28         | Male   | Hamstring tendon       |                                                                                                                        |
