# Supplementary material for: Identification of Pathways Mediating Growth Differentiation Factor5-Induced Tenogenic Differentiation in Human Bone Marrow Stromal Cells
Source: PubMed Central journal article supplement (PMC4631504; doi:10.1371/journal.pone.0140869), 2015-11-03
Supplement: pone.0140869.s006.pdf [file pone.0140869.s006.pdf]

**S2 Table. Reagents used for immunofluorescence staining for fluorescence imaging.**

| No | Antibody                                                                | Dilution | Catalogue No. | Manufacturer                          |
|----|-------------------------------------------------------------------------|----------|---------------|---------------------------------------|
| 1  | Type-I collagen mouse mAb                                               | 1:200    | GTX26308      | GeneTex, Inc, Irvine, CA              |
| 2  | Type-II collagen mouse mAb                                              | 1:200    | CP18          | Calbiochem, Darmstadt, Germany        |
| 3  | Type-III collagen mouse mAb                                             | 1:200    | CP19          | Calbiochem, Darmstadt, Germany        |
| 4  | Nucleostamin (9D5.3) mouse mAb                                          | 1:200    | ab78129       | Abcam, UK                             |
| 5  | Tenascin C (EB2) mouse mAb                                              | 1:200    | ab88280       | Abcam, UK                             |
| 6  | Scleraxis (D-14) goat polyclonal antibody                               | 1:200    | sc-87425      | Santa Cruz Biotechnology, California  |
| 7  | Tenomodulin (C-20) goat polyclonal antibody                             | 1:200    | sc-49324      | Santa Cruz Biotechnology, California  |
| 8  | Fluorescein isothiocyanate (FITC)-conjugated rat anti-mouse IgG (A85-1) | 1:200    | 553443        | BD Biosciences, US                    |
| 9  | Texas red-conjugated donkey anti-goat IgG                               | 1:200    | sc-2783       | Santa Cruz Biotechnology, California  |
| 10 | Alexa Fluor® 546 phalloidin                                             | 1:40     | A22283        | Invitrogen, Carlsbad, California, USA |
| 11 | Hoechst 33342, trihydrochloride, trihydrate (10 mg/ml)                  | 5 µg/ml  | H3570         | Invitrogen, Carlsbad, California, USA |
| 12 | FluoroGel mounting medium                                               | -        | GTX28214      | GeneTex, Inc, Irvine, CA              |
