# Supplementary material for: Identification of Pathways Mediating Growth Differentiation Factor5-Induced Tenogenic Differentiation in Human Bone Marrow Stromal Cells
Source: PubMed Central journal article supplement (PMC4631504; doi:10.1371/journal.pone.0140869), 2015-11-03
Supplement: pone.0140869.s007.pdf [file pone.0140869.s007.pdf]

**S3 Table. QuantiGene® Plex 2.0 Assay (311904-215 Human) Reagent System**

| <b>Bead Number</b> | <b>Gene Symbol</b> | <b>Genbank Accession No</b> | <b>Seq Length</b> | <b>Probe set region</b> | <b>Type</b> | <b>Target Name</b>                                                                 |
|--------------------|--------------------|-----------------------------|-------------------|-------------------------|-------------|------------------------------------------------------------------------------------|
| 13                 | RUNX2              | NM_004348                   | 5720              | 648-1082                | Target      | runt-related transcription factor 2                                                |
| 14                 | MMP3               | NM_002422                   | 1828              | 1119-1775               | Target      | Matrix metalloproteinase 3                                                         |
| 20                 | SCXA               | NM_001008271                | 606               | 251-574                 | Target      | Homo sapiens scleraxis homolog A (mouse) (SCXA)                                    |
| 21                 | COMP               | NM_000095                   | 2471              | 1420-1842               | Target      | Homo sapiens cartilage oligomeric matrix protein (COMP), mRNA                      |
| 25                 | PGK1               | NM_000291                   | 2439              | 1609-2233               | HKG         | phosphoglycerate kinase 1 (Medium High abundant HKG)                               |
| 27                 | COL2A1             | NM_001844                   | 5087              | 1788-2258               | Target      | Type-II alpha 1 (primary osteoarthritis, spomdyloepiphyseal dysplasia, congenital) |
| 30                 | FIGF               | NM_004469                   | 2128              | 835-1476                | Target      | c-fos induced growth factor (vascular endothelial growth factor D)                 |
| 34                 | HPRT1              | NM_000194                   | 1435              | 102-646                 | HKG         | Hypoxanthine phosphoribosyltransferase 1 (Medium abundant HKG)                     |
| 43                 | ALPL               | NM_000478                   | 2596              | 1075-1617               | Target      | alkaline phosphatase, liver/bone/kidney                                            |
| 44                 | BGLAP              | NM_199173                   | 552               | 113-477                 | Target      | bone gamma-carboxyglutamate (gla) protein                                          |
| 45                 | PPARG              | NM_005037                   | 1818              | 567-1044                | Target      | peroxisome proliferative activated receptor, gamma                                 |
| 46                 | TNC                | NM_002160                   | 8605              | 2687-3165               | Target      | tenascin C                                                                         |

---

|    |      |           |      |           |        |                                                                                    |
|----|------|-----------|------|-----------|--------|------------------------------------------------------------------------------------|
| 53 | SOX9 | NM_000346 | 3963 | 1607-2274 | Target | SRY(Sex determining region Y)-box 9 (campomelic dysplasia, autosomal sex-reversal) |
| 56 | TNMD | NM_022144 | 1360 | 301-1020  | Target | Homo sapiens tenomodulin (TNMD)                                                    |
| 57 | TBP  | NM_003194 | 1921 | 277-822   | HKG    | TATA box binding protein (Low abundant HKG)                                        |

---
