# Supplementary material for: Identification of Pathways Mediating Growth Differentiation Factor5-Induced Tenogenic Differentiation in Human Bone Marrow Stromal Cells
Source: PubMed Central journal article supplement (PMC4631504; doi:10.1371/journal.pone.0140869), 2015-11-03
Supplement: pone.0140869.s008.pdf [file pone.0140869.s008.pdf]

**S4 Table. Summary of total number of probe sets or genes before and after data normalization and filtering.**

| <b>Probe Sets</b>                                                                                                                    | <b>Total</b>  |
|--------------------------------------------------------------------------------------------------------------------------------------|---------------|
| 1. Estimated number of genes on array                                                                                                | 28,869        |
| 2. Total distinct probe sets on the array                                                                                            | 764,885       |
| 3. Positive control probe sets on the array                                                                                          | 1,195         |
| 4. Negative control probe sets on the array                                                                                          | 2,904         |
| <b>5. Total number of probe sets detected on chip</b>                                                                                | <b>33,297</b> |
| 6. Total number of probe sets detected on chip but do not have a present DABG detection call                                         | 1,320         |
| 7. Total number of probe sets detected on chip after omitted control probe sets and probe sets without a present DABG detection call | 27,878        |
| 8. Number of probe sets omitted after data filtering                                                                                 | 662           |
| <b>9. Total number of probe sets used to assess differentially expressed genes</b>                                                   | <b>27,216</b> |
