# Supplementary material for: Identification of Pathways Mediating Growth Differentiation Factor5-Induced Tenogenic Differentiation in Human Bone Marrow Stromal Cells
Source: PubMed Central journal article supplement (PMC4631504; doi:10.1371/journal.pone.0140869), 2015-11-03
Supplement: pone.0140869.s009.pdf [file pone.0140869.s009.pdf]

**S5 Table. A summary of the number of differentially expressed probe sets.**

|                     | <b>Uncorrected <i>p</i>-value &lt;0.001</b> |               | <b>Corrected <i>p</i>-value&lt;0.05</b> |               |
|---------------------|---------------------------------------------|---------------|-----------------------------------------|---------------|
|                     | Log-ratio < -1                              | Log-ratio > 1 | Log-ratio < -1                          | Log-ratio > 1 |
| <b>Group 1 vs 4</b> | 168                                         | 159           | 204                                     | 182           |
| <b>Group 2 vs 4</b> | 211                                         | 185           | 268                                     | 212           |
| <b>Group 3 vs 4</b> | 324                                         | 264           | 400                                     | 291           |
| <b>Group 1 vs 3</b> | 139                                         | 98            | 152                                     | 119           |
| <b>Group 2 vs 3</b> | 50                                          | 8             | 50                                      | 8             |
| <b>Group 1 vs 2</b> | 19                                          | 22            | 12                                      | 19            |

(Group 1: Control hMSC, Group 2: Day-4 GDF5-induced hMSC, Group 3: Day-10 GDF5-induced hMSC, Group 4: tenocytes)
