# Supplementary material for: Identification of Pathways Mediating Growth Differentiation Factor5-Induced Tenogenic Differentiation in Human Bone Marrow Stromal Cells
Source: PubMed Central journal article supplement (PMC4631504; doi:10.1371/journal.pone.0140869), 2015-11-03
Supplement: pone.0140869.s010.pdf [file pone.0140869.s010.pdf]

**S6 Table. The most significantly altered genes in the GDF5-induced hMSC and tenocytes [LR: log2 ratio, p-value (corr): corrected p-value].**

| Gene Symbol                                           | Description                                                                | Day 4 GDF5-induction (G2 vs G1) |                 | Day 10 GDF5-induction (G3 vs G1) |                 | Tenocytes (G4 vs G1) |                 | Day 10 vs Day 4 GDF5-induction (G3 vs G2) |                | Tenocytes vs Day 4 GDF5-Induction (G4 vs G2) |                | Tenocytes vs Day 10 GDF5-Induction (G4 vs G3) |                |
|-------------------------------------------------------|----------------------------------------------------------------------------|---------------------------------|-----------------|----------------------------------|-----------------|----------------------|-----------------|-------------------------------------------|----------------|----------------------------------------------|----------------|-----------------------------------------------|----------------|
|                                                       |                                                                            | LR                              | p-value (corr)  | LR                               | p-value (corr)  | LR                   | p-value (corr)  | LR                                        | p-value (corr) | LR                                           | p-value (corr) | LR                                            | p-value (corr) |
| <b>Most up-regulated in day 4 GDF5-induced hMSCs</b>  |                                                                            |                                 |                 |                                  |                 |                      |                 |                                           |                |                                              |                |                                               |                |
| CMKLR1                                                | chemokine-like receptor 1                                                  | <b>1.99</b>                     | <b>1.08E-02</b> | 2.49                             | 1.12E-04        | -0.39                | 6.87E-01        | 0.50                                      | 6.21E-01       | -2.38                                        | 3.77E-04       | -2.88                                         | 2.59E-05       |
| FADS2                                                 | fatty acid desaturase 2                                                    | <b>1.71</b>                     | <b>2.38E-02</b> | 1.75                             | 2.40E-03        | 0.83                 | 2.37E-01        | 0.05                                      | 9.79E-01       | -0.88                                        | 1.91E-01       | -0.93                                         | 1.36E-01       |
| ACAT2                                                 | acetyl-CoA acetyltransferase 2                                             | <b>1.37</b>                     | <b>2.41E-02</b> | 1.16                             | 1.16E-02        | 0.82                 | 1.19E-01        | -0.21                                     | 8.23E-01       | -0.55                                        | 3.58E-01       | -0.33                                         | 6.28E-01       |
| <b>CCL2</b>                                           | <b>chemokine (C-C motif) ligand 2</b>                                      | <b>1.35</b>                     | <b>4.35E-03</b> | 2.07                             | 3.34E-06        | 1.82                 | 3.89E-05        | 0.73                                      | 1.02E-01       | 0.48                                         | 2.94E-01       | -0.25                                         | 6.52E-01       |
| PIK3R3                                                | phosphoinositide-3-kinase, regulatory subunit 3 (gamma)                    | <b>1.33</b>                     | <b>5.42E-03</b> | 1.43                             | 2.63E-04        | 0.74                 | 7.20E-02        | 0.09                                      | 9.20E-01       | -0.59                                        | 1.68E-01       | -0.68                                         | 7.84E-02       |
| SC4MOL                                                | sterol-C4-methyl oxidase-like                                              | <b>1.30</b>                     | <b>1.28E-02</b> | 1.19                             | 3.10E-03        | 0.36                 | 5.41E-01        | -0.11                                     | 9.13E-01       | -0.94                                        | 3.01E-02       | -0.83                                         | 4.46E-02       |
| FDPS                                                  | farnesyl diphosphate synthase                                              | <b>1.24</b>                     | <b>3.76E-02</b> | 1.02                             | 2.11E-02        | 0.06                 | 9.54E-01        | -0.22                                     | 8.08E-01       | -1.17                                        | 1.42E-02       | -0.96                                         | 3.66E-02       |
| TIPARP                                                | TCDD-inducible poly(ADP-ribose) polymerase                                 | <b>1.11</b>                     | <b>3.40E-03</b> | 1.09                             | 4.00E-04        | 0.23                 | 6.00E-01        | -0.02                                     | 9.82E-01       | -0.87                                        | 5.99E-03       | -0.85                                         | 5.03E-03       |
| SQLE                                                  | squalene epoxidase                                                         | <b>1.10</b>                     | <b>1.02E-02</b> | 1.42                             | 7.32E-05        | 0.55                 | 1.49E-01        | 0.32                                      | 5.51E-01       | -0.55                                        | 1.36E-01       | -0.87                                         | 9.22E-03       |
| <b>ARHGAP29</b>                                       | <b>Rho GTPase activating protein 29</b>                                    | <b>1.10</b>                     | <b>1.30E-02</b> | 1.03                             | 2.66E-03        | 1.94                 | 6.10E-06        | -0.07                                     | 9.36E-01       | 0.85                                         | 2.10E-02       | 0.92                                          | 8.74E-03       |
| <b>Most up-regulated in day 10 GDF5-induced hMSCs</b> |                                                                            |                                 |                 |                                  |                 |                      |                 |                                           |                |                                              |                |                                               |                |
| MX1                                                   | myxovirus (influenza virus) resistance 1, interferon-inducible protein p78 | 0.18                            | 9.58E-01        | <b>3.35</b>                      | <b>5.01E-04</b> | 0.22                 | 9.19E-01        | 3.17                                      | 3.50E-03       | 0.04                                         | 9.88E-01       | -3.14                                         | 1.29E-03       |
| HERC6                                                 | hect domain and RLD 6                                                      | 0.15                            | 9.49E-01        | <b>3.02</b>                      | <b>3.10E-05</b> | 0.09                 | 9.55E-01        | 2.87                                      | 3.81E-04       | -0.06                                        | 9.65E-01       | -2.93                                         | 5.22E-05       |
| OAS1                                                  | 2',5'-oligoadenylate synthetase 1, 40/46kDa                                | 0.39                            | 8.69E-01        | <b>2.99</b>                      | <b>4.91E-04</b> | 1.68                 | 6.76E-02        | 2.60                                      | 7.05E-03       | 1.29                                         | 1.82E-01       | -1.31                                         | 1.48E-01       |
| CCL26                                                 | chemokine (C-C motif) ligand 26                                            | -0.09                           | 9.60E-01        | <b>2.89</b>                      | <b>2.22E-06</b> | -0.14                | 8.94E-01        | 2.98                                      | 1.36E-05       | -0.05                                        | 9.64E-01       | -3.03                                         | 1.06E-06       |
| KRT14                                                 | keratin 14                                                                 | 0.90                            | 4.67E-01        | <b>2.87</b>                      | <b>1.31E-04</b> | 0.47                 | 6.74E-01        | 1.97                                      | 1.39E-02       | -0.43                                        | 7.09E-01       | -2.40                                         | 1.08E-03       |
| TNFAIP6                                               | tumor necrosis factor, alpha-induced protein 6                             | 0.19                            | 9.24E-01        | <b>2.68</b>                      | <b>5.39E-05</b> | 1.69                 | 9.61E-03        | 2.49                                      | 6.98E-04       | 1.50                                         | 2.01E-02       | -0.99                                         | 1.23E-01       |
| IFIT1                                                 | interferon-induced protein with tetratricopeptide repeats 1                | -0.04                           | 9.93E-01        | <b>2.58</b>                      | <b>7.82E-03</b> | 0.28                 | 8.96E-01        | 2.62                                      | 2.00E-02       | 0.32                                         | 8.67E-01       | -2.30                                         | 2.16E-02       |
| HTR2A                                                 | 5-hydroxytryptamine (serotonin) receptor 2A                                | 0.43                            | 8.43E-01        | <b>2.58</b>                      | <b>1.73E-03</b> | -1.31                | 1.69E-01        | 2.14                                      | 2.21E-02       | -1.75                                        | 4.85E-02       | -3.89                                         | 2.91E-05       |
| C1QTNF3                                               | C1q and tumor necrosis factor related protein 3                            | 0.93                            | 2.39E-01        | <b>2.58</b>                      | <b>1.66E-05</b> | 0.37                 | 6.50E-01        | 1.64                                      | 6.03E-03       | -0.56                                        | 4.09E-01       | -2.21                                         | 1.07E-04       |
| OAS2                                                  | 2'-5'-oligoadenylate synthetase 2, 69/71kDa                                | 0.50                            | 6.06E-01        | <b>2.57</b>                      | <b>8.22E-06</b> | -0.35                | 6.42E-01        | 2.07                                      | 5.90E-04       | -0.86                                        | 1.20E-01       | -2.92                                         | 1.78E-06       |
| <b>Most up-regulated in tenocytes</b>                 |                                                                            |                                 |                 |                                  |                 |                      |                 |                                           |                |                                              |                |                                               |                |
| RPS4Y1                                                | ribosomal protein S4, Y-linked 1                                           | -0.09                           | 9.79E-01        | -0.04                            | 9.83E-01        | <b>4.64</b>          | <b>2.26E-05</b> | 0.05                                      | 9.86E-01       | 4.73                                         | 1.23E-05       | 4.68                                          | 9.54E-06       |
| EIF1AY                                                | eukaryotic translation initiation factor 1A, Y-linked                      | 0.02                            | 9.97E-01        | 0.02                             | 9.92E-01        | <b>4.49</b>          | <b>2.58E-05</b> | 0.00                                      | 1.00E+00       | 4.47                                         | 1.98E-05       | 4.47                                          | 1.32E-05       |

|       |                                                    |       |          |       |          |             |                 |       |          |      |          |      |          |
|-------|----------------------------------------------------|-------|----------|-------|----------|-------------|-----------------|-------|----------|------|----------|------|----------|
| DDX3Y | DEAD (Asp-Glu-Ala-Asp) box polypeptide 3, Y-linked | 0.14  | 9.62E-01 | 0.12  | 9.39E-01 | <b>4.24</b> | <b>3.45E-05</b> | -0.02 | 9.94E-01 | 4.10 | 4.14E-05 | 4.12 | 2.34E-05 |
| RBP4  | retinol binding protein 4, plasma                  | 0.21  | 8.40E-01 | 0.37  | 4.26E-01 | <b>4.23</b> | <b>1.95E-10</b> | 0.16  | 8.42E-01 | 4.03 | 3.89E-10 | 3.86 | 9.62E-10 |
| THBS4 | thrombospondin 4                                   | 0.05  | 9.89E-01 | 0.30  | 8.11E-01 | <b>4.04</b> | <b>2.16E-05</b> | 0.26  | 8.85E-01 | 3.99 | 1.65E-05 | 3.73 | 2.54E-05 |
| FGL2  | fibrinogen-like 2                                  | -0.49 | 9.01E-01 | 2.42  | 5.03E-02 | <b>3.96</b> | <b>3.59E-03</b> | 2.91  | 4.20E-02 | 4.45 | 1.03E-03 | 1.54 | 2.89E-01 |
| PRG4  | proteoglycan 4                                     | 0.25  | 9.62E-01 | -0.89 | 6.73E-01 | <b>3.89</b> | <b>1.47E-02</b> | -1.14 | 6.56E-01 | 3.64 | 2.06E-02 | 4.78 | 1.69E-03 |
| OGN   | osteoglycin                                        | 1.56  | 4.92E-01 | 1.36  | 3.47E-01 | <b>3.57</b> | <b>8.85E-03</b> | -0.20 | 9.56E-01 | 2.01 | 1.64E-01 | 2.21 | 9.50E-02 |
| MEOX2 | mesenchyme homeobox 2                              | 0.97  | 4.17E-01 | 0.54  | 5.63E-01 | <b>3.51</b> | <b>3.30E-05</b> | -0.44 | 7.39E-01 | 2.54 | 9.87E-04 | 2.98 | 1.16E-04 |
| CLGN  | calmegin                                           | -0.14 | 9.51E-01 | -0.70 | 3.19E-01 | <b>3.47</b> | <b>6.42E-06</b> | -0.56 | 5.81E-01 | 3.61 | 3.27E-06 | 4.17 | 2.39E-07 |

**Most down-regulated in day 4 GDF5-induced hMSCs**

|                |                                                                        |              |                 |       |          |       |          |       |          |       |          |       |          |
|----------------|------------------------------------------------------------------------|--------------|-----------------|-------|----------|-------|----------|-------|----------|-------|----------|-------|----------|
| <b>NEFM</b>    | <b>neurofilament, medium polypeptide</b>                               | <b>-2.23</b> | <b>3.53E-02</b> | -2.55 | 1.45E-03 | -2.44 | 5.04E-03 | -0.32 | 8.51E-01 | -0.22 | 8.94E-01 | 0.11  | 9.52E-01 |
| <b>ITGA8</b>   | <b>integrin, alpha 8</b>                                               | <b>-1.86</b> | <b>5.42E-03</b> | -2.99 | 2.63E-06 | -3.06 | 3.72E-06 | -1.14 | 6.34E-02 | -1.20 | 3.13E-02 | -0.06 | 9.57E-01 |
| HMOX1          | heme oxygenase (decycling) 1                                           | <b>-1.73</b> | <b>1.89E-02</b> | -2.21 | 2.12E-04 | 0.57  | 4.61E-01 | -0.48 | 6.10E-01 | 2.30  | 2.73E-04 | 2.78  | 1.84E-05 |
| <b>PODXL</b>   | <b>podocalyxin-like</b>                                                | <b>-1.69</b> | <b>1.26E-02</b> | -1.92 | 4.07E-04 | 2.01  | 6.39E-04 | -0.23 | 8.37E-01 | 3.70  | 1.91E-07 | 3.93  | 5.75E-08 |
| ID3            | inhibitor of DNA binding 3, dominant negative helix-loop-helix protein | <b>-1.57</b> | <b>9.01E-05</b> | -1.38 | 5.62E-05 | 0.07  | 9.21E-01 | 0.19  | 7.42E-01 | 1.64  | 1.22E-05 | 1.45  | 3.74E-05 |
| <b>STC1</b>    | <b>stanniocalcin 1</b>                                                 | <b>-1.49</b> | <b>1.17E-02</b> | -1.45 | 1.58E-03 | -1.07 | 3.12E-02 | 0.04  | 9.75E-01 | 0.42  | 5.09E-01 | 0.38  | 5.43E-01 |
| <b>ACAN</b>    | <b>aggrecan</b>                                                        | <b>-1.46</b> | <b>1.03E-02</b> | -2.22 | 1.32E-05 | -1.37 | 4.24E-03 | -0.76 | 1.65E-01 | 0.09  | 9.24E-01 | 0.85  | 6.15E-02 |
| TFRC           | transferrin receptor (p90, CD71)                                       | <b>-1.45</b> | <b>1.22E-03</b> | -0.76 | 2.96E-02 | -0.49 | 2.52E-01 | 0.69  | 1.10E-01 | 0.96  | 1.17E-02 | 0.27  | 5.95E-01 |
| MT2A           | metallothionein 2A                                                     | <b>-1.34</b> | <b>2.05E-05</b> | -0.79 | 8.36E-04 | 0.37  | 1.81E-01 | 0.55  | 4.21E-02 | 1.71  | 1.38E-07 | 1.16  | 1.71E-05 |
| <b>C7orf69</b> | <b>chromosome 7 open reading frame 69</b>                              | <b>-1.32</b> | <b>3.08E-02</b> | -1.26 | 5.29E-03 | -1.57 | 2.02E-03 | 0.05  | 9.69E-01 | -0.26 | 7.39E-01 | -0.31 | 6.57E-01 |

**Most down-regulated in day 10 GDF5-induced hMSCs**

|              |                                                                          |              |                 |              |                 |       |          |       |          |       |          |       |          |
|--------------|--------------------------------------------------------------------------|--------------|-----------------|--------------|-----------------|-------|----------|-------|----------|-------|----------|-------|----------|
| SLC14A1      | solute carrier family 14 (urea transporter), member 1 (Kidd blood group) | -0.03        | 9.95E-01        | <b>-3.03</b> | <b>4.19E-04</b> | -1.38 | 1.50E-01 | -3.00 | 2.34E-03 | -1.35 | 1.53E-01 | 1.65  | 5.37E-02 |
| <b>ITGA8</b> | <b>integrin, alpha 8</b>                                                 | <b>-1.86</b> | <b>5.42E-03</b> | <b>-2.99</b> | <b>2.63E-06</b> | -3.06 | 3.72E-06 | -1.14 | 6.34E-02 | -1.20 | 3.13E-02 | -0.06 | 9.57E-01 |
| DLGAP5       | discs, large (Drosophila) homolog-associated protein 5                   | -1.80        | 1.56E-01        | <b>-2.99</b> | <b>8.20E-04</b> | -0.02 | 9.94E-01 | -1.19 | 3.23E-01 | 1.78  | 6.28E-02 | 2.97  | 1.18E-03 |
| IL7R         | interleukin 7 receptor                                                   | -2.08        | 8.20E-02        | <b>-2.74</b> | <b>1.51E-03</b> | -2.08 | 2.62E-02 | -0.66 | 6.58E-01 | 0.00  | 9.99E-01 | 0.67  | 5.87E-01 |
| ANLN         | anillin, actin binding protein                                           | -1.61        | 2.29E-01        | <b>-2.68</b> | <b>2.37E-03</b> | 0.17  | 9.35E-01 | -1.07 | 4.01E-01 | 1.78  | 6.39E-02 | 2.84  | 1.81E-03 |
| <b>NEFM</b>  | <b>neurofilament, medium polypeptide</b>                                 | <b>-2.23</b> | <b>3.53E-02</b> | <b>-2.55</b> | <b>1.45E-03</b> | -2.44 | 5.04E-03 | -0.32 | 8.51E-01 | -0.22 | 8.94E-01 | 0.11  | 9.52E-01 |
| MKI67        | antigen identified by monoclonal antibody Ki-67                          | -1.80        | 1.29E-01        | <b>-2.55</b> | <b>2.05E-03</b> | 0.49  | 7.22E-01 | -0.75 | 5.79E-01 | 2.29  | 9.78E-03 | 3.04  | 5.19E-04 |
| KIF20A       | kinesin family member 20A                                                | -1.44        | 2.41E-01        | <b>-2.55</b> | <b>1.60E-03</b> | 0.09  | 9.65E-01 | -1.11 | 3.09E-01 | 1.52  | 8.52E-02 | 2.63  | 1.57E-03 |
| TOP2A        | topoisomerase (DNA) II alpha 170kDa                                      | -1.32        | 2.65E-01        | <b>-2.42</b> | <b>1.61E-03</b> | 0.38  | 7.82E-01 | -1.10 | 2.80E-01 | 1.70  | 3.82E-02 | 2.80  | 5.47E-04 |
| ASPM         | asp (abnormal spindle) homolog, microcephaly associated (Drosophila)     | -1.19        | 3.42E-01        | <b>-2.37</b> | <b>2.26E-03</b> | 0.77  | 4.74E-01 | -1.18 | 2.42E-01 | 1.96  | 1.83E-02 | 3.14  | 1.93E-04 |

**Most down-regulated in tenocytes**

|      |           |       |          |       |          |              |                 |       |          |       |          |       |          |
|------|-----------|-------|----------|-------|----------|--------------|-----------------|-------|----------|-------|----------|-------|----------|
| SRGN | serglycin | -0.12 | 9.64E-01 | -0.40 | 7.22E-01 | <b>-4.41</b> | <b>3.72E-06</b> | -0.28 | 8.64E-01 | -4.29 | 4.22E-06 | -4.01 | 6.81E-06 |
|------|-----------|-------|----------|-------|----------|--------------|-----------------|-------|----------|-------|----------|-------|----------|

|              |                                                           |       |          |       |          |              |                 |       |          |       |          |       |          |
|--------------|-----------------------------------------------------------|-------|----------|-------|----------|--------------|-----------------|-------|----------|-------|----------|-------|----------|
| VCAM1        | vascular cell adhesion molecule 1                         | 0.54  | 7.83E-01 | 0.83  | 3.85E-01 | <b>-3.92</b> | <b>5.05E-05</b> | 0.29  | 8.74E-01 | -4.46 | 7.02E-06 | -4.75 | 2.30E-06 |
| ANK3         | ankyrin 3, node of Ranvier (ankyrin G)                    | 0.42  | 6.51E-01 | 0.46  | 3.99E-01 | <b>-3.59</b> | <b>4.09E-08</b> | 0.04  | 9.80E-01 | -4.01 | 4.57E-09 | -4.05 | 3.80E-09 |
| ANKRD1       | ankyrin repeat domain 1 (cardiac muscle)                  | -1.02 | 6.25E-01 | 0.03  | 9.90E-01 | <b>-3.41</b> | <b>2.81E-03</b> | 1.05  | 5.19E-01 | -2.39 | 3.12E-02 | -3.44 | 1.37E-03 |
| DEPDC6       | DEP domain containing 6                                   | 0.15  | 9.62E-01 | 0.04  | 9.84E-01 | <b>-3.35</b> | <b>7.16E-04</b> | -0.11 | 9.65E-01 | -3.49 | 3.80E-04 | -3.38 | 3.44E-04 |
| PDE5A        | phosphodiesterase 5A, cGMP-specific                       | -0.24 | 8.85E-01 | -1.44 | 8.82E-03 | <b>-3.31</b> | <b>3.72E-06</b> | -1.19 | 7.04E-02 | -3.07 | 7.02E-06 | -1.87 | 1.26E-03 |
| <b>ITGA8</b> | <b>integrin, alpha 8</b>                                  | -1.86 | 5.42E-03 | -2.99 | 2.63E-06 | <b>-3.06</b> | <b>3.72E-06</b> | -1.14 | 6.34E-02 | -1.20 | 3.13E-02 | -0.06 | 9.57E-01 |
| TSPAN18      | tetraspanin 18                                            | -0.05 | 9.87E-01 | -1.49 | 5.82E-02 | <b>-3.05</b> | <b>5.65E-04</b> | -1.43 | 1.35E-01 | -3.00 | 5.37E-04 | -1.57 | 5.16E-02 |
| SERPINB2     | serpin peptidase inhibitor, clade B (ovalbumin), member 2 | -0.01 | 9.98E-01 | 1.32  | 2.39E-01 | <b>-2.95</b> | <b>8.21E-03</b> | 1.34  | 3.51E-01 | -2.94 | 7.69E-03 | -4.28 | 1.42E-04 |
| RAB27B       | RAB27B, member RAS oncogene family                        | -0.83 | 6.60E-01 | -1.14 | 2.61E-01 | <b>-2.84</b> | <b>4.80E-03</b> | -0.31 | 8.83E-01 | -2.00 | 4.30E-02 | -1.70 | 7.62E-02 |

**Co-expressed genes (Up- or down-regulated in all day 4, 10 GDF5-induced hMSCs and tenocytes)**

|                 |                                          |       |          |       |          |       |          |       |          |       |          |       |          |
|-----------------|------------------------------------------|-------|----------|-------|----------|-------|----------|-------|----------|-------|----------|-------|----------|
| <b>ITGA8</b>    | <b>integrin, alpha 8</b>                 | -1.86 | 5.42E-03 | -2.99 | 2.63E-06 | -3.06 | 3.72E-06 | -1.14 | 6.34E-02 | -1.20 | 3.13E-02 | -0.06 | 9.57E-01 |
| <b>NEFM</b>     | <b>neurofilament, medium polypeptide</b> | -2.23 | 3.53E-02 | -2.55 | 1.45E-03 | -2.44 | 5.04E-03 | -0.32 | 8.51E-01 | -0.22 | 8.94E-01 | 0.11  | 9.52E-01 |
| C7orf69         | chromosome 7 open reading frame 69       | -1.32 | 3.08E-02 | -1.26 | 5.29E-03 | -1.57 | 2.02E-03 | 0.05  | 9.69E-01 | -0.26 | 7.39E-01 | -0.31 | 6.57E-01 |
| ACAN            | aggrecan                                 | -1.46 | 1.03E-02 | -2.22 | 1.32E-05 | -1.37 | 4.24E-03 | -0.76 | 1.65E-01 | 0.09  | 9.24E-01 | 0.85  | 6.15E-02 |
| STC1            | stanniocalcin 1                          | -1.49 | 1.17E-02 | -1.45 | 1.58E-03 | -1.07 | 3.12E-02 | 0.04  | 9.75E-01 | 0.42  | 5.09E-01 | 0.38  | 5.43E-01 |
| ENO2            | enolase 2 (gamma, neuronal)              | -1.30 | 2.22E-03 | -1.69 | 1.32E-05 | -1.02 | 5.41E-03 | -0.39 | 4.17E-01 | 0.28  | 5.63E-01 | 0.68  | 4.84E-02 |
| <b>CCL2</b>     | <b>chemokine (C-C motif) ligand 2</b>    | 1.35  | 4.35E-03 | 2.07  | 3.34E-06 | 1.82  | 3.89E-05 | 0.73  | 1.02E-01 | 0.48  | 2.94E-01 | -0.25 | 6.52E-01 |
| <b>ARHGAP29</b> | <b>Rho GTPase activating protein 29</b>  | 1.10  | 1.30E-02 | 1.03  | 2.66E-03 | 1.94  | 6.10E-06 | -0.07 | 9.36E-01 | 0.85  | 2.10E-02 | 0.92  | 8.74E-03 |
| PODXL           | podocalyxin-like                         | -1.69 | 1.26E-02 | -1.92 | 4.07E-04 | 2.01  | 6.39E-04 | -0.23 | 8.37E-01 | 3.70  | 1.91E-07 | 3.93  | 5.75E-08 |

---
