# Supplementary material for: Identification of Pathways Mediating Growth Differentiation Factor5-Induced Tenogenic Differentiation in Human Bone Marrow Stromal Cells
Source: PubMed Central journal article supplement (PMC4631504; doi:10.1371/journal.pone.0140869), 2015-11-03
Supplement: pone.0140869.s011.pdf [file pone.0140869.s011.pdf]

**S7 Table. List of Genes Modulated in hMSCs by GDF5 Treatment and Genes Modulated in Tenocytes (Total: 873 genes)**

| Gene Symbol | Day 4 GDF5-induction (G2 vs G1) |                | Day 10 GDF5-induction (G3 vs G1) |                | Tenocytes (G4 vs G1) |                | Day 10 vs Day 4 GDF5-induction (G3 vs G2) |                | Tenocytes vs Day 4 GDF5-Induction (G4 vs G2) |                | Tenocytes vs Day 10 GDF5-Induction (G4 vs G3) |                |
|-------------|---------------------------------|----------------|----------------------------------|----------------|----------------------|----------------|-------------------------------------------|----------------|----------------------------------------------|----------------|-----------------------------------------------|----------------|
|             | LR                              | p-value (corr) | LR                               | p-value (corr) | LR                   | p-value (corr) | LR                                        | p-value (corr) | LR                                           | p-value (corr) | LR                                            | p-value (corr) |
| ABCA8       | -0.28                           | 8.16E-01       | -0.56                            | 2.92E-01       | -2.02                | 2.28E-04       | -0.28                                     | 7.53E-01       | -1.74                                        | 8.87E-04       | -1.46                                         | 2.94E-03       |
| ABCC9       | -0.75                           | 4.16E-01       | -1.24                            | 1.95E-02       | -1.10                | 6.60E-02       | -0.50                                     | 5.77E-01       | -0.35                                        | 6.88E-01       | 0.15                                          | 8.88E-01       |
| ACAN        | -1.46                           | 1.03E-02       | -2.22                            | 1.32E-05       | -1.37                | 4.24E-03       | -0.76                                     | 1.65E-01       | 0.09                                         | 9.24E-01       | 0.85                                          | 6.15E-02       |
| ACAT2       | 1.37                            | 2.41E-02       | 1.16                             | 1.16E-02       | 0.82                 | 1.19E-01       | -0.21                                     | 8.23E-01       | -0.55                                        | 3.58E-01       | -0.33                                         | 6.28E-01       |
| ACSS3       | -0.08                           | 9.58E-01       | -0.65                            | 1.18E-01       | -1.87                | 8.53E-05       | -0.58                                     | 2.88E-01       | -1.79                                        | 1.11E-04       | -1.22                                         | 3.43E-03       |
| ACTA2       | 0.23                            | 7.63E-01       | 0.00                             | 9.98E-01       | -2.07                | 9.38E-07       | -0.23                                     | 6.96E-01       | -2.30                                        | 1.64E-07       | -2.07                                         | 5.28E-07       |
| ACTA2       | 0.40                            | 6.14E-01       | -0.12                            | 8.63E-01       | -1.01                | 1.90E-02       | -0.52                                     | 3.43E-01       | -1.41                                        | 1.18E-03       | -0.89                                         | 2.80E-02       |
| ACTC1       | -0.69                           | 7.10E-01       | -0.81                            | 4.32E-01       | 1.41                 | 1.48E-01       | -0.12                                     | 9.60E-01       | 2.10                                         | 2.04E-02       | 2.22                                          | 9.97E-03       |
| ACVR2A      | 0.95                            | 2.51E-01       | 1.15                             | 3.03E-02       | -2.16                | 4.06E-04       | 0.20                                      | 8.65E-01       | -3.11                                        | 3.65E-06       | -3.31                                         | 1.07E-06       |
| ADAM23      | 0.36                            | 8.14E-01       | 0.69                             | 3.18E-01       | 2.33                 | 6.20E-04       | 0.33                                      | 7.82E-01       | 1.98                                         | 2.56E-03       | 1.65                                          | 7.72E-03       |
| ADAMTS12    | 0.51                            | 6.57E-01       | 1.51                             | 5.95E-03       | -0.17                | 8.80E-01       | 1.00                                      | 1.45E-01       | -0.68                                        | 3.32E-01       | -1.68                                         | 3.33E-03       |
| ADAMTS2     | -0.02                           | 9.89E-01       | 0.22                             | 6.73E-01       | -0.93                | 1.98E-02       | 0.25                                      | 7.13E-01       | -0.91                                        | 2.12E-02       | -1.15                                         | 2.40E-03       |
| ADAMTS9     | 0.67                            | 8.75E-03       | 0.99                             | 1.40E-05       | -0.48                | 2.38E-02       | 0.32                                      | 1.98E-01       | -1.15                                        | 3.27E-06       | -1.48                                         | 5.75E-08       |
| ADAMTSL1    | -0.28                           | 6.63E-01       | -0.75                            | 1.24E-02       | 0.61                 | 7.02E-02       | -0.48                                     | 2.26E-01       | 0.89                                         | 6.89E-03       | 1.37                                          | 6.15E-05       |
| ADAMTSL1    | -0.19                           | 8.51E-01       | -1.02                            | 5.53E-03       | 0.74                 | 7.38E-02       | -0.83                                     | 5.91E-02       | 0.93                                         | 2.00E-02       | 1.75                                          | 3.21E-05       |
| ADAMTSL3    | -0.01                           | 9.93E-01       | 0.03                             | 9.42E-01       | 1.88                 | 4.09E-08       | 0.04                                      | 9.45E-01       | 1.89                                         | 3.05E-08       | 1.84                                          | 3.67E-08       |
| AGPAT9      | 0.08                            | 9.24E-01       | -0.03                            | 9.55E-01       | 1.02                 | 7.16E-04       | -0.11                                     | 8.43E-01       | 0.94                                         | 1.44E-03       | 1.05                                          | 2.83E-04       |
| AHNAK2      | 0.12                            | 9.67E-01       | -0.31                            | 8.08E-01       | 1.89                 | 2.65E-02       | -0.43                                     | 7.79E-01       | 1.77                                         | 3.53E-02       | 2.21                                          | 6.03E-03       |
| AHR         | 0.33                            | 3.21E-01       | 0.24                             | 3.12E-01       | -0.70                | 2.38E-03       | -0.09                                     | 8.39E-01       | -1.03                                        | 2.78E-05       | -0.94                                         | 5.57E-05       |
| AIM1        | 0.25                            | 7.80E-01       | 1.03                             | 5.65E-03       | 2.23                 | 3.72E-06       | 0.78                                      | 8.41E-02       | 1.98                                         | 1.31E-05       | 1.20                                          | 2.14E-03       |
| AK5         | -0.41                           | 7.95E-01       | -0.75                            | 3.09E-01       | 0.83                 | 3.11E-01       | -0.34                                     | 7.94E-01       | 1.24                                         | 8.25E-02       | 1.58                                          | 1.69E-02       |
| AKAP6       | -0.50                           | 5.68E-01       | -0.61                            | 2.08E-01       | 0.97                 | 5.14E-02       | -0.11                                     | 9.19E-01       | 1.47                                         | 2.69E-03       | 1.58                                          | 8.78E-04       |
| ALDH18A1    | 0.18                            | 7.48E-01       | 0.65                             | 6.91E-03       | -0.37                | 1.97E-01       | 0.47                                      | 1.12E-01       | -0.55                                        | 3.54E-02       | -1.02                                         | 1.34E-04       |
| ALDH1B1     | 0.38                            | 6.29E-01       | 0.23                             | 6.74E-01       | -0.79                | 6.34E-02       | -0.14                                     | 8.68E-01       | -1.17                                        | 4.85E-03       | -1.02                                         | 9.23E-03       |
| ALDOC       | -0.52                           | 1.89E-01       | -1.04                            | 2.24E-04       | -0.80                | 6.40E-03       | -0.52                                     | 1.05E-01       | -0.28                                        | 4.46E-01       | 0.25                                          | 4.81E-01       |
| ALPK2       | 0.10                            | 9.56E-01       | 0.26                             | 7.06E-01       | -1.19                | 1.85E-02       | 0.16                                      | 8.77E-01       | -1.29                                        | 1.02E-02       | -1.45                                         | 2.54E-03       |
| AMIGO2      | -1.13                           | 1.16E-01       | -0.32                            | 6.52E-01       | -1.50                | 6.40E-03       | 0.81                                      | 2.12E-01       | -0.37                                        | 6.36E-01       | -1.18                                         | 2.20E-02       |

|           |       |          |       |          |       |          |       |          |       |          |       |          |
|-----------|-------|----------|-------|----------|-------|----------|-------|----------|-------|----------|-------|----------|
| ANGPTL1   | 0.94  | 2.96E-01 | 2.39  | 9.68E-05 | 0.22  | 8.46E-01 | 1.45  | 2.61E-02 | -0.72 | 3.10E-01 | -2.17 | 3.61E-04 |
| ANGPTL2   | 0.08  | 9.76E-01 | -0.35 | 7.14E-01 | 1.45  | 3.98E-02 | -0.43 | 7.18E-01 | 1.37  | 4.90E-02 | 1.80  | 6.40E-03 |
| ANGPTL5   | -0.03 | 9.94E-01 | -0.23 | 8.51E-01 | 2.85  | 3.26E-04 | -0.20 | 9.04E-01 | 2.88  | 2.29E-04 | 3.08  | 6.63E-05 |
| ANGPTL7   | 0.06  | 9.90E-01 | -0.09 | 9.60E-01 | 2.45  | 1.74E-02 | -0.15 | 9.56E-01 | 2.40  | 1.86E-02 | 2.54  | 8.58E-03 |
| ANK3      | 0.42  | 6.51E-01 | 0.46  | 3.99E-01 | -3.59 | 4.09E-08 | 0.04  | 9.80E-01 | -4.01 | 4.57E-09 | -4.05 | 3.80E-09 |
| ANKFN1    | -0.03 | 9.88E-01 | -0.34 | 5.49E-01 | -1.04 | 2.61E-02 | -0.31 | 6.88E-01 | -1.02 | 2.79E-02 | -0.71 | 1.26E-01 |
| ANKRD1    | -1.02 | 6.25E-01 | 0.03  | 9.90E-01 | -3.41 | 2.81E-03 | 1.05  | 5.19E-01 | -2.39 | 3.12E-02 | -3.44 | 1.37E-03 |
| ANKRD37   | -0.79 | 2.18E-01 | -0.70 | 1.10E-01 | -1.27 | 5.98E-03 | 0.09  | 9.34E-01 | -0.48 | 3.80E-01 | -0.57 | 2.37E-01 |
| ANKRD5    | 0.07  | 9.62E-01 | -0.30 | 5.77E-01 | -0.94 | 3.36E-02 | -0.37 | 5.82E-01 | -1.01 | 2.06E-02 | -0.64 | 1.48E-01 |
| ANLN      | -1.61 | 2.29E-01 | -2.68 | 2.37E-03 | 0.17  | 9.35E-01 | -1.07 | 4.01E-01 | 1.78  | 6.39E-02 | 2.84  | 1.81E-03 |
| ANXA3     | 0.04  | 9.78E-01 | 0.13  | 8.50E-01 | 1.26  | 4.30E-03 | 0.09  | 9.32E-01 | 1.22  | 4.89E-03 | 1.13  | 6.18E-03 |
| AOX1      | -0.42 | 7.90E-01 | -0.97 | 1.62E-01 | 0.73  | 4.05E-01 | -0.55 | 6.18E-01 | 1.15  | 1.18E-01 | 1.70  | 1.10E-02 |
| AP1S2     | -0.30 | 6.10E-01 | -0.46 | 1.37E-01 | 1.24  | 2.55E-04 | -0.16 | 7.83E-01 | 1.54  | 1.35E-05 | 1.70  | 2.89E-06 |
| AP3M2     | -0.29 | 6.78E-01 | -0.40 | 2.69E-01 | -1.05 | 3.76E-03 | -0.12 | 8.78E-01 | -0.76 | 3.16E-02 | -0.64 | 5.81E-02 |
| APOBEC3B  | -0.57 | 3.33E-01 | -1.11 | 2.36E-03 | -0.43 | 3.60E-01 | -0.54 | 2.58E-01 | 0.13  | 8.46E-01 | 0.67  | 7.51E-02 |
| APOL1     | -0.14 | 9.24E-01 | 1.37  | 2.43E-03 | -2.03 | 1.18E-04 | 1.51  | 3.73E-03 | -1.89 | 2.12E-04 | -3.40 | 5.75E-08 |
| ARHGAP11A | -0.68 | 5.28E-01 | -1.69 | 3.27E-03 | 0.82  | 2.42E-01 | -1.01 | 1.59E-01 | 1.50  | 1.53E-02 | 2.51  | 8.76E-05 |
| ARHGAP11B | -0.72 | 2.76E-01 | -1.04 | 1.19E-02 | 0.32  | 6.13E-01 | -0.32 | 6.60E-01 | 1.04  | 2.06E-02 | 1.36  | 1.74E-03 |
| ARHGAP28  | 1.36  | 1.42E-01 | 1.22  | 5.77E-02 | -0.43 | 6.72E-01 | -0.14 | 9.32E-01 | -1.80 | 9.33E-03 | -1.66 | 1.11E-02 |
| ARHGAP29  | 1.10  | 1.30E-02 | 1.03  | 2.66E-03 | 1.94  | 6.10E-06 | -0.07 | 9.36E-01 | 0.85  | 2.10E-02 | 0.92  | 8.74E-03 |
| ARL15     | 0.24  | 7.34E-01 | 0.58  | 7.01E-02 | -0.55 | 1.31E-01 | 0.34  | 4.93E-01 | -0.79 | 2.00E-02 | -1.13 | 7.57E-04 |
| ARL4C     | -0.07 | 9.74E-01 | 0.58  | 3.71E-01 | -1.15 | 5.78E-02 | 0.64  | 4.22E-01 | -1.08 | 7.30E-02 | -1.72 | 2.40E-03 |
| ARMC4     | -0.15 | 9.22E-01 | -0.04 | 9.65E-01 | 1.36  | 5.80E-03 | 0.11  | 9.26E-01 | 1.51  | 2.12E-03 | 1.40  | 2.63E-03 |
| ARRDC3    | 0.06  | 9.59E-01 | -0.48 | 1.67E-01 | 0.82  | 2.10E-02 | -0.54 | 1.94E-01 | 0.76  | 3.07E-02 | 1.30  | 2.43E-04 |
| ARRDC4    | 0.44  | 3.04E-01 | 0.40  | 1.62E-01 | -1.27 | 7.96E-05 | -0.04 | 9.60E-01 | -1.72 | 1.30E-06 | -1.68 | 1.18E-06 |
| AS3MT     | -0.41 | 4.16E-01 | -1.07 | 4.05E-04 | -0.48 | 1.53E-01 | -0.67 | 5.07E-02 | -0.08 | 8.95E-01 | 0.59  | 5.07E-02 |
| ASPM      | -1.19 | 3.42E-01 | -2.37 | 2.26E-03 | 0.77  | 4.74E-01 | -1.18 | 2.42E-01 | 1.96  | 1.83E-02 | 3.14  | 1.93E-04 |
| ATAD2     | -0.27 | 8.28E-01 | -0.66 | 1.93E-01 | 0.36  | 6.20E-01 | -0.39 | 6.20E-01 | 0.63  | 2.79E-01 | 1.02  | 3.52E-02 |
| ATAD5     | -0.24 | 8.69E-01 | -0.35 | 6.19E-01 | 0.96  | 9.49E-02 | -0.11 | 9.34E-01 | 1.20  | 2.91E-02 | 1.31  | 1.21E-02 |
| ATP13A3   | -0.42 | 3.10E-01 | -0.30 | 3.06E-01 | -1.17 | 1.29E-04 | 0.12  | 8.31E-01 | -0.75 | 7.63E-03 | -0.87 | 1.45E-03 |
| ATP1B1    | -0.01 | 9.98E-01 | 0.41  | 5.23E-01 | -0.60 | 3.42E-01 | 0.41  | 6.16E-01 | -0.60 | 3.40E-01 | -1.01 | 4.63E-02 |
| AURKA     | -1.13 | 4.19E-01 | -1.82 | 2.47E-02 | 0.09  | 9.64E-01 | -0.69 | 6.13E-01 | 1.22  | 2.05E-01 | 1.91  | 2.20E-02 |
| B3GALT2   | 0.16  | 9.24E-01 | -0.88 | 9.83E-02 | -1.40 | 1.24E-02 | -1.04 | 9.22E-02 | -1.56 | 4.85E-03 | -0.52 | 4.26E-01 |
| B4GALT5   | 0.13  | 9.09E-01 | 0.12  | 8.38E-01 | 1.15  | 2.28E-03 | -0.01 | 9.94E-01 | 1.03  | 5.11E-03 | 1.03  | 3.25E-03 |

|           |       |          |       |          |       |          |       |          |       |          |       |          |
|-----------|-------|----------|-------|----------|-------|----------|-------|----------|-------|----------|-------|----------|
| BARD1     | -0.28 | 7.09E-01 | -0.95 | 5.05E-03 | 0.66  | 8.54E-02 | -0.67 | 1.06E-01 | 0.94  | 1.10E-02 | 1.60  | 3.47E-05 |
| BAZ1A     | -0.12 | 8.20E-01 | -0.02 | 9.62E-01 | 0.97  | 1.12E-04 | 0.10  | 8.12E-01 | 1.09  | 1.81E-05 | 0.99  | 4.08E-05 |
| BDKRB1    | -0.85 | 4.91E-01 | -1.75 | 9.28E-03 | 1.29  | 9.07E-02 | -0.90 | 3.43E-01 | 2.14  | 3.58E-03 | 3.04  | 6.46E-05 |
| BDKRB2    | 0.07  | 9.71E-01 | -0.63 | 2.65E-01 | 0.51  | 4.71E-01 | -0.70 | 3.16E-01 | 0.44  | 5.52E-01 | 1.15  | 2.87E-02 |
| BDNF      | -0.60 | 1.39E-01 | -0.99 | 5.67E-04 | -1.03 | 1.02E-03 | -0.39 | 3.01E-01 | -0.43 | 1.86E-01 | -0.04 | 9.50E-01 |
| BEND6     | 0.83  | 1.42E-01 | 0.66  | 1.02E-01 | 1.36  | 1.75E-03 | -0.17 | 8.36E-01 | 0.53  | 2.62E-01 | 0.70  | 8.63E-02 |
| BEX1      | 0.31  | 9.24E-01 | 0.44  | 7.72E-01 | -2.47 | 1.74E-02 | 0.13  | 9.60E-01 | -2.78 | 6.87E-03 | -2.91 | 3.16E-03 |
| BHMT2     | 0.57  | 5.42E-01 | 0.90  | 6.80E-02 | -1.36 | 1.07E-02 | 0.34  | 7.05E-01 | -1.92 | 4.25E-04 | -2.26 | 4.19E-05 |
| BIRC3     | 0.44  | 5.70E-01 | 0.13  | 8.54E-01 | 1.24  | 4.47E-03 | -0.31 | 6.57E-01 | 0.80  | 6.41E-02 | 1.11  | 6.36E-03 |
| BIRC5     | -1.28 | 3.75E-01 | -2.09 | 1.45E-02 | 0.05  | 9.81E-01 | -0.82 | 5.65E-01 | 1.33  | 1.89E-01 | 2.15  | 1.53E-02 |
| BNC1      | -0.05 | 9.68E-01 | 0.48  | 1.72E-01 | 1.20  | 1.27E-03 | 0.53  | 2.12E-01 | 1.25  | 6.75E-04 | 0.72  | 3.52E-02 |
| BPGM      | 0.26  | 5.75E-01 | 0.63  | 7.62E-03 | -0.61 | 1.82E-02 | 0.37  | 2.34E-01 | -0.87 | 9.21E-04 | -1.24 | 1.01E-05 |
| BRCA2     | -0.36 | 8.18E-01 | 0.20  | 8.54E-01 | 1.08  | 1.26E-01 | 0.56  | 5.82E-01 | 1.45  | 3.02E-02 | 0.88  | 2.05E-01 |
| BST2      | 0.02  | 9.93E-01 | 1.00  | 2.60E-03 | -0.20 | 7.27E-01 | 0.99  | 9.42E-03 | -0.21 | 6.95E-01 | -1.20 | 6.78E-04 |
| BTN3A3    | 0.30  | 7.02E-01 | 0.74  | 3.73E-02 | -0.30 | 5.64E-01 | 0.44  | 3.86E-01 | -0.60 | 1.40E-01 | -1.04 | 4.50E-03 |
| BUB1B     | -1.37 | 3.39E-01 | -1.99 | 2.28E-02 | 0.40  | 8.05E-01 | -0.62 | 6.96E-01 | 1.77  | 6.70E-02 | 2.39  | 8.10E-03 |
| C10orf116 | -0.15 | 7.74E-01 | -0.37 | 1.11E-01 | 0.74  | 2.80E-03 | -0.21 | 5.54E-01 | 0.89  | 3.54E-04 | 1.11  | 1.76E-05 |
| C11orf87  | 0.45  | 5.47E-01 | 0.37  | 4.46E-01 | -0.98 | 2.34E-02 | -0.08 | 9.33E-01 | -1.43 | 1.03E-03 | -1.35 | 1.15E-03 |
| C13orf33  | 0.79  | 1.33E-01 | 0.46  | 2.56E-01 | 1.22  | 2.51E-03 | -0.34 | 5.80E-01 | 0.43  | 3.57E-01 | 0.77  | 4.11E-02 |
| C14orf106 | -0.34 | 4.84E-01 | -0.29 | 3.50E-01 | 0.87  | 3.13E-03 | 0.05  | 9.47E-01 | 1.21  | 8.71E-05 | 1.16  | 8.89E-05 |
| C14orf145 | -0.18 | 9.03E-01 | -0.47 | 4.04E-01 | 0.75  | 1.73E-01 | -0.29 | 7.45E-01 | 0.93  | 7.04E-02 | 1.22  | 1.09E-02 |
| C16orf87  | 0.32  | 7.02E-01 | 0.76  | 4.94E-02 | -0.44 | 3.91E-01 | 0.44  | 4.42E-01 | -0.76 | 7.30E-02 | -1.20 | 2.64E-03 |
| C18orf54  | 0.32  | 7.51E-01 | -0.16 | 8.26E-01 | 0.87  | 7.15E-02 | -0.48 | 4.68E-01 | 0.55  | 3.12E-01 | 1.03  | 2.04E-02 |
| C1orf21   | -0.02 | 9.88E-01 | -0.78 | 1.27E-02 | 0.55  | 1.23E-01 | -0.76 | 3.90E-02 | 0.58  | 1.03E-01 | 1.33  | 1.29E-04 |
| C1orf54   | -0.14 | 9.00E-01 | -1.28 | 4.53E-04 | -2.33 | 6.61E-07 | -1.14 | 5.58E-03 | -2.19 | 1.52E-06 | -1.05 | 3.78E-03 |
| C1QTNF3   | 0.93  | 2.39E-01 | 2.58  | 1.66E-05 | 0.37  | 6.50E-01 | 1.64  | 6.03E-03 | -0.56 | 4.09E-01 | -2.21 | 1.07E-04 |
| C21orf7   | 0.52  | 5.59E-01 | 0.33  | 6.06E-01 | -1.31 | 9.01E-03 | -0.19 | 8.46E-01 | -1.83 | 3.85E-04 | -1.64 | 7.89E-04 |
| C3        | 0.98  | 5.49E-01 | 0.78  | 4.65E-01 | 2.20  | 1.83E-02 | -0.20 | 9.26E-01 | 1.22  | 2.33E-01 | 1.43  | 1.21E-01 |
| C4orf31   | 0.54  | 7.83E-01 | 0.01  | 9.98E-01 | -2.66 | 3.17E-03 | -0.54 | 7.18E-01 | -3.20 | 4.25E-04 | -2.66 | 1.67E-03 |
| C5        | 0.20  | 8.15E-01 | -0.65 | 5.81E-02 | 0.82  | 2.80E-02 | -0.86 | 3.00E-02 | 0.62  | 1.07E-01 | 1.47  | 1.01E-04 |
| C5orf13   | 0.36  | 6.93E-01 | 0.35  | 5.27E-01 | -0.73 | 1.36E-01 | -0.01 | 9.91E-01 | -1.09 | 1.71E-02 | -1.08 | 1.32E-02 |
| C5orf30   | 0.11  | 9.38E-01 | 0.02  | 9.81E-01 | 1.24  | 4.41E-03 | -0.09 | 9.32E-01 | 1.14  | 7.91E-03 | 1.22  | 2.89E-03 |
| C5orf36   | 0.66  | 9.56E-02 | 0.93  | 1.08E-03 | -0.11 | 8.48E-01 | 0.28  | 5.42E-01 | -0.76 | 1.15E-02 | -1.04 | 5.30E-04 |
| C5orf36   | 0.62  | 1.51E-01 | 1.01  | 8.69E-04 | -0.10 | 8.72E-01 | 0.39  | 3.51E-01 | -0.72 | 2.43E-02 | -1.10 | 4.92E-04 |

|          |       |          |       |          |       |          |       |          |       |          |       |          |
|----------|-------|----------|-------|----------|-------|----------|-------|----------|-------|----------|-------|----------|
| C6orf138 | 1.05  | 1.46E-01 | 0.56  | 3.24E-01 | -1.25 | 2.08E-02 | -0.49 | 5.42E-01 | -2.30 | 6.99E-05 | -1.82 | 6.06E-04 |
| C7orf58  | -0.13 | 9.68E-01 | -0.32 | 8.40E-01 | 1.58  | 1.36E-01 | -0.19 | 9.37E-01 | 1.71  | 9.47E-02 | 1.90  | 4.53E-02 |
| C7orf69  | -1.32 | 3.08E-02 | -1.26 | 5.29E-03 | -1.57 | 2.02E-03 | 0.05  | 9.69E-01 | -0.26 | 7.39E-01 | -0.31 | 6.57E-01 |
| C8orf84  | 0.00  | 9.99E-01 | -0.17 | 8.81E-01 | -1.52 | 2.34E-02 | -0.17 | 9.11E-01 | -1.52 | 2.12E-02 | -1.35 | 3.18E-02 |
| C9orf21  | 0.03  | 9.78E-01 | 0.50  | 5.73E-02 | 1.09  | 2.75E-04 | 0.47  | 1.44E-01 | 1.06  | 2.90E-04 | 0.59  | 2.63E-02 |
| CAB39L   | 0.81  | 2.29E-01 | 1.06  | 1.43E-02 | 0.49  | 4.04E-01 | 0.26  | 7.58E-01 | -0.32 | 6.41E-01 | -0.57 | 2.59E-01 |
| CACHD1   | -0.25 | 8.02E-01 | -0.07 | 9.30E-01 | 1.07  | 1.53E-02 | 0.19  | 8.25E-01 | 1.33  | 2.64E-03 | 1.14  | 6.38E-03 |
| CACNB2   | 0.19  | 8.67E-01 | -0.05 | 9.51E-01 | 1.25  | 3.24E-03 | -0.23 | 7.50E-01 | 1.07  | 1.01E-02 | 1.30  | 1.24E-03 |
| CACNB4   | 0.44  | 7.29E-01 | 1.32  | 1.73E-02 | 1.13  | 6.92E-02 | 0.88  | 2.23E-01 | 0.69  | 3.28E-01 | -0.19 | 8.52E-01 |
| CADM1    | 0.14  | 9.26E-01 | 1.03  | 1.86E-02 | -0.11 | 9.07E-01 | 0.89  | 9.28E-02 | -0.25 | 7.35E-01 | -1.14 | 1.13E-02 |
| CALCRL   | 0.56  | 5.43E-01 | 0.53  | 3.45E-01 | -1.20 | 2.24E-02 | -0.03 | 9.84E-01 | -1.76 | 9.42E-04 | -1.73 | 7.23E-04 |
| CAMK2N1  | 0.57  | 5.53E-01 | 0.46  | 4.70E-01 | 1.42  | 1.03E-02 | -0.12 | 9.27E-01 | 0.84  | 1.45E-01 | 0.96  | 6.92E-02 |
| CAPG     | -0.35 | 7.30E-01 | -0.64 | 1.84E-01 | 1.20  | 1.50E-02 | -0.29 | 7.27E-01 | 1.55  | 1.72E-03 | 1.84  | 1.94E-04 |
| CASC5    | -1.40 | 3.04E-01 | -2.24 | 8.75E-03 | 0.45  | 7.67E-01 | -0.84 | 5.49E-01 | 1.85  | 4.85E-02 | 2.69  | 2.63E-03 |
| CBLB     | -0.65 | 3.13E-02 | -1.00 | 6.63E-05 | -0.46 | 6.95E-02 | -0.35 | 2.50E-01 | 0.19  | 5.61E-01 | 0.54  | 2.05E-02 |
| CCBE1    | -0.63 | 4.65E-01 | -0.85 | 9.06E-02 | 0.73  | 2.07E-01 | -0.22 | 8.35E-01 | 1.37  | 9.50E-03 | 1.58  | 1.82E-03 |
| CCDC18   | -0.27 | 6.29E-01 | -0.22 | 5.55E-01 | 1.30  | 7.46E-05 | 0.06  | 9.37E-01 | 1.57  | 4.83E-06 | 1.52  | 5.46E-06 |
| CCDC81   | 0.80  | 1.73E-01 | 0.81  | 4.27E-02 | -0.44 | 4.14E-01 | 0.01  | 9.92E-01 | -1.23 | 4.09E-03 | -1.24 | 2.56E-03 |
| CCL11    | 0.22  | 9.15E-01 | 2.00  | 1.65E-03 | 0.07  | 9.66E-01 | 1.78  | 1.36E-02 | -0.15 | 9.08E-01 | -1.93 | 2.94E-03 |
| CCL2     | 1.35  | 4.35E-03 | 2.07  | 3.34E-06 | 1.82  | 3.89E-05 | 0.73  | 1.02E-01 | 0.48  | 2.94E-01 | -0.25 | 6.52E-01 |
| CCL26    | -0.09 | 9.60E-01 | 2.89  | 2.22E-06 | -0.14 | 8.94E-01 | 2.98  | 1.36E-05 | -0.05 | 9.64E-01 | -3.03 | 1.06E-06 |
| CCNA2    | -1.21 | 3.36E-01 | -1.76 | 2.29E-02 | 0.05  | 9.78E-01 | -0.54 | 7.02E-01 | 1.27  | 1.57E-01 | 1.81  | 2.30E-02 |
| CCND2    | 0.45  | 8.30E-01 | 0.82  | 3.93E-01 | -1.32 | 1.61E-01 | 0.37  | 8.27E-01 | -1.77 | 4.28E-02 | -2.14 | 9.49E-03 |
| CD109    | 0.18  | 8.23E-01 | 0.05  | 9.31E-01 | 1.09  | 1.54E-03 | -0.13 | 8.47E-01 | 0.91  | 5.93E-03 | 1.04  | 1.24E-03 |
| CD200    | 0.40  | 6.76E-01 | 0.27  | 6.84E-01 | -0.70 | 1.96E-01 | -0.13 | 9.02E-01 | -1.10 | 2.45E-02 | -0.97 | 3.86E-02 |
| CD248    | 0.38  | 2.51E-01 | 0.49  | 2.22E-02 | -1.54 | 2.29E-07 | 0.11  | 8.08E-01 | -1.92 | 4.57E-09 | -2.02 | 2.28E-09 |
| CD36     | 0.63  | 7.72E-01 | 0.74  | 5.26E-01 | -2.54 | 9.75E-03 | 0.11  | 9.65E-01 | -3.16 | 1.37E-03 | -3.28 | 6.33E-04 |
| CD55     | -0.01 | 9.98E-01 | 0.02  | 9.89E-01 | 1.40  | 3.94E-02 | 0.02  | 9.91E-01 | 1.41  | 3.54E-02 | 1.39  | 2.93E-02 |
| CD68     | -0.48 | 4.82E-01 | -1.29 | 9.02E-04 | 0.04  | 9.62E-01 | -0.81 | 7.62E-02 | 0.53  | 2.52E-01 | 1.33  | 8.97E-04 |
| CD9      | 0.19  | 8.89E-01 | 0.35  | 5.50E-01 | 1.01  | 3.85E-02 | 0.16  | 8.77E-01 | 0.82  | 9.93E-02 | 0.66  | 1.80E-01 |
| CDC42EP3 | -0.08 | 9.54E-01 | -0.33 | 4.55E-01 | -1.44 | 3.87E-04 | -0.25 | 6.95E-01 | -1.36 | 5.37E-04 | -1.11 | 2.46E-03 |
| CDC45    | -0.46 | 7.03E-01 | -0.55 | 4.07E-01 | 0.79  | 2.41E-01 | -0.09 | 9.53E-01 | 1.25  | 3.66E-02 | 1.34  | 1.77E-02 |
| CDC6     | 0.24  | 8.69E-01 | 1.03  | 4.35E-02 | 0.35  | 6.70E-01 | 0.79  | 2.36E-01 | 0.11  | 9.23E-01 | -0.68 | 2.46E-01 |
| CDCA2    | -0.49 | 7.04E-01 | -1.02 | 9.15E-02 | 0.86  | 2.26E-01 | -0.53 | 5.85E-01 | 1.35  | 3.36E-02 | 1.88  | 2.11E-03 |

|        |       |          |       |          |       |          |       |          |       |          |       |          |
|--------|-------|----------|-------|----------|-------|----------|-------|----------|-------|----------|-------|----------|
| CDCA7L | -0.44 | 5.56E-01 | -0.01 | 9.87E-01 | 0.79  | 6.90E-02 | 0.43  | 4.75E-01 | 1.23  | 3.59E-03 | 0.80  | 4.62E-02 |
| CDCP1  | -0.66 | 5.25E-01 | -0.95 | 9.59E-02 | 0.20  | 8.54E-01 | -0.29 | 7.92E-01 | 0.86  | 1.81E-01 | 1.15  | 4.31E-02 |
| CDH1   | 0.41  | 5.74E-01 | 1.12  | 2.81E-03 | -0.26 | 6.57E-01 | 0.71  | 1.20E-01 | -0.67 | 1.10E-01 | -1.38 | 5.37E-04 |
| CDH6   | -0.14 | 9.58E-01 | -0.04 | 9.79E-01 | -2.20 | 5.95E-03 | 0.10  | 9.60E-01 | -2.06 | 9.07E-03 | -2.16 | 4.09E-03 |
| CDK1   | -0.26 | 8.70E-01 | -0.43 | 5.47E-01 | 0.83  | 2.06E-01 | -0.17 | 8.93E-01 | 1.09  | 7.14E-02 | 1.26  | 2.45E-02 |
| CDK6   | 0.42  | 5.22E-01 | 1.07  | 2.69E-03 | -0.07 | 9.31E-01 | 0.65  | 1.42E-01 | -0.50 | 2.48E-01 | -1.14 | 2.06E-03 |
| CDKN3  | -1.17 | 2.96E-01 | -2.23 | 1.80E-03 | 0.23  | 8.76E-01 | -1.06 | 2.58E-01 | 1.40  | 7.29E-02 | 2.46  | 9.75E-04 |
| CDRT1  | -0.29 | 7.60E-01 | 1.00  | 1.29E-02 | -0.66 | 1.69E-01 | 1.29  | 6.36E-03 | -0.37 | 5.31E-01 | -1.66 | 1.94E-04 |
| CENPE  | -0.64 | 6.38E-01 | -0.91 | 2.05E-01 | 1.11  | 1.52E-01 | -0.27 | 8.52E-01 | 1.75  | 1.46E-02 | 2.02  | 3.34E-03 |
| CENPF  | -1.73 | 1.16E-01 | -2.21 | 3.96E-03 | 0.53  | 6.64E-01 | -0.48 | 7.37E-01 | 2.26  | 6.37E-03 | 2.74  | 7.64E-04 |
| CENPJ  | -0.05 | 9.70E-01 | 0.49  | 2.68E-01 | 1.02  | 1.88E-02 | 0.54  | 3.18E-01 | 1.07  | 1.21E-02 | 0.53  | 2.50E-01 |
| CENPK  | -0.32 | 8.68E-01 | -0.59 | 4.83E-01 | 1.34  | 7.12E-02 | -0.27 | 8.51E-01 | 1.66  | 2.12E-02 | 1.93  | 5.08E-03 |
| CENPW  | -0.51 | 5.85E-01 | -0.75 | 1.34E-01 | 0.32  | 6.72E-01 | -0.24 | 8.03E-01 | 0.83  | 1.22E-01 | 1.07  | 2.80E-02 |
| CEP135 | -0.36 | 3.57E-01 | -0.24 | 4.07E-01 | 0.77  | 3.84E-03 | 0.12  | 7.95E-01 | 1.13  | 6.05E-05 | 1.01  | 1.41E-04 |
| CEP55  | -1.12 | 3.98E-01 | -1.83 | 1.84E-02 | 0.64  | 5.87E-01 | -0.71 | 5.82E-01 | 1.75  | 3.84E-02 | 2.47  | 2.40E-03 |
| CERCAM | 0.09  | 9.03E-01 | 0.52  | 3.01E-02 | -0.93 | 6.09E-04 | 0.43  | 1.54E-01 | -1.02 | 1.80E-04 | -1.45 | 1.56E-06 |
| CFH    | 0.46  | 3.14E-01 | 0.61  | 3.41E-02 | -0.44 | 1.99E-01 | 0.15  | 7.99E-01 | -0.90 | 3.74E-03 | -1.05 | 6.23E-04 |
| CH25H  | 0.69  | 4.13E-01 | 0.30  | 6.77E-01 | 1.77  | 1.33E-03 | -0.39 | 6.43E-01 | 1.08  | 4.26E-02 | 1.47  | 3.73E-03 |
| CHAF1B | -0.43 | 5.39E-01 | -0.61 | 1.13E-01 | 0.48  | 3.15E-01 | -0.18 | 8.14E-01 | 0.91  | 2.33E-02 | 1.09  | 4.56E-03 |
| CHI3L1 | 0.21  | 9.73E-01 | -1.45 | 4.87E-01 | 2.53  | 1.99E-01 | -1.67 | 5.28E-01 | 2.32  | 2.45E-01 | 3.99  | 1.85E-02 |
| CHMP1B | -0.43 | 4.44E-01 | -0.66 | 3.95E-02 | 0.60  | 1.01E-01 | -0.23 | 6.85E-01 | 1.02  | 3.28E-03 | 1.26  | 2.96E-04 |
| CHN1   | 0.21  | 9.01E-01 | 0.43  | 5.43E-01 | -1.30 | 2.57E-02 | 0.21  | 8.56E-01 | -1.52 | 8.67E-03 | -1.73 | 1.90E-03 |
| CHODL  | -0.05 | 9.34E-01 | 0.05  | 8.87E-01 | 1.36  | 2.96E-07 | 0.10  | 7.86E-01 | 1.42  | 1.38E-07 | 1.31  | 2.52E-07 |
| CHRD1  | 0.52  | 5.97E-01 | 1.38  | 4.97E-03 | 3.33  | 5.50E-07 | 0.86  | 1.63E-01 | 2.82  | 4.83E-06 | 1.96  | 2.66E-04 |
| CIT    | -0.11 | 9.62E-01 | -1.17 | 8.95E-02 | 0.82  | 3.48E-01 | -1.06 | 2.23E-01 | 0.93  | 2.52E-01 | 1.99  | 4.09E-03 |
| CKAP2  | -0.30 | 7.31E-01 | -0.66 | 1.01E-01 | 0.37  | 4.89E-01 | -0.35 | 5.80E-01 | 0.68  | 1.22E-01 | 1.03  | 9.28E-03 |
| CKAP2L | -0.86 | 6.10E-01 | -1.49 | 8.53E-02 | 0.89  | 4.45E-01 | -0.63 | 6.76E-01 | 1.75  | 5.79E-02 | 2.38  | 6.28E-03 |
| CKS2   | -0.61 | 6.34E-01 | -1.24 | 4.94E-02 | -0.05 | 9.73E-01 | -0.63 | 5.30E-01 | 0.56  | 5.36E-01 | 1.19  | 7.03E-02 |
| CLDN11 | 0.09  | 9.78E-01 | -0.16 | 9.18E-01 | 1.99  | 2.72E-02 | -0.25 | 8.98E-01 | 1.90  | 3.26E-02 | 2.15  | 1.08E-02 |
| CLGN   | -0.14 | 9.51E-01 | -0.70 | 3.19E-01 | 3.47  | 6.42E-06 | -0.56 | 5.81E-01 | 3.61  | 3.27E-06 | 4.17  | 2.39E-07 |
| CLSPN  | -0.93 | 5.74E-01 | -1.26 | 1.64E-01 | 0.65  | 6.15E-01 | -0.33 | 8.61E-01 | 1.58  | 9.42E-02 | 1.91  | 2.79E-02 |
| CLU    | 0.55  | 8.09E-01 | -0.07 | 9.69E-01 | 3.14  | 1.92E-03 | -0.62 | 7.07E-01 | 2.59  | 8.34E-03 | 3.21  | 8.22E-04 |
| CMAH   | 0.91  | 1.11E-01 | 0.73  | 7.33E-02 | -0.24 | 7.21E-01 | -0.18 | 8.31E-01 | -1.15 | 7.72E-03 | -0.97 | 1.77E-02 |
| CMKLR1 | 1.99  | 1.08E-02 | 2.49  | 1.12E-04 | -0.39 | 6.87E-01 | 0.50  | 6.21E-01 | -2.38 | 3.77E-04 | -2.88 | 2.59E-05 |

|            |       |          |       |          |       |          |       |          |       |          |       |          |
|------------|-------|----------|-------|----------|-------|----------|-------|----------|-------|----------|-------|----------|
| CNKS2R2    | -0.21 | 8.31E-01 | -0.02 | 9.75E-01 | 2.70  | 1.94E-07 | 0.18  | 8.08E-01 | 2.91  | 4.36E-08 | 2.72  | 8.47E-08 |
| CNN1       | 1.12  | 1.33E-01 | 0.81  | 1.34E-01 | -0.96 | 9.97E-02 | -0.31 | 7.47E-01 | -2.08 | 3.31E-04 | -1.77 | 1.10E-03 |
| CNTN3      | -0.10 | 9.54E-01 | -0.04 | 9.68E-01 | 1.58  | 3.13E-03 | 0.06  | 9.62E-01 | 1.68  | 1.46E-03 | 1.62  | 1.33E-03 |
| COBLL1     | 0.33  | 3.44E-01 | 1.22  | 2.68E-06 | 0.53  | 2.19E-02 | 0.89  | 5.90E-04 | 0.20  | 4.92E-01 | -0.69 | 1.71E-03 |
| COG6       | 0.16  | 7.44E-01 | 0.73  | 1.06E-03 | -0.41 | 9.76E-02 | 0.56  | 2.52E-02 | -0.57 | 1.51E-02 | -1.13 | 1.07E-05 |
| COL11A1    | 0.45  | 7.55E-01 | 0.65  | 3.72E-01 | -1.08 | 1.27E-01 | 0.20  | 8.90E-01 | -1.53 | 2.16E-02 | -1.73 | 6.54E-03 |
| COL14A1    | 0.91  | 7.57E-02 | 1.37  | 3.70E-04 | 0.94  | 1.90E-02 | 0.46  | 3.83E-01 | 0.03  | 9.72E-01 | -0.43 | 3.36E-01 |
| COL15A1    | 0.41  | 7.89E-01 | 1.31  | 3.69E-02 | 0.41  | 6.93E-01 | 0.90  | 2.88E-01 | 0.00  | 9.99E-01 | -0.90 | 2.00E-01 |
| COL1A1     | 0.43  | 5.28E-01 | 0.98  | 6.96E-03 | -0.26 | 6.56E-01 | 0.55  | 2.62E-01 | -0.69 | 8.91E-02 | -1.24 | 1.25E-03 |
| COL3A1     | 0.88  | 1.54E-02 | 1.74  | 1.14E-06 | -0.23 | 5.74E-01 | 0.85  | 8.38E-03 | -1.12 | 3.66E-04 | -1.97 | 1.38E-07 |
| COL4A1     | -0.18 | 9.41E-01 | 0.18  | 8.88E-01 | -2.11 | 7.12E-03 | 0.37  | 7.98E-01 | -1.93 | 1.25E-02 | -2.30 | 2.10E-03 |
| COL4A2     | -0.19 | 9.18E-01 | 0.01  | 9.93E-01 | -1.46 | 1.48E-02 | 0.20  | 8.74E-01 | -1.27 | 3.17E-02 | -1.47 | 9.01E-03 |
| COL5A2     | 0.51  | 1.77E-01 | 1.29  | 1.66E-05 | -0.32 | 3.40E-01 | 0.78  | 9.30E-03 | -0.83 | 3.06E-03 | -1.61 | 1.06E-06 |
| COL6A1     | 0.45  | 3.88E-01 | 1.32  | 9.34E-05 | 0.26  | 5.72E-01 | 0.87  | 1.52E-02 | -0.19 | 7.10E-01 | -1.06 | 1.17E-03 |
| COLEC12    | 0.39  | 7.93E-01 | 0.13  | 9.05E-01 | 2.11  | 1.78E-03 | -0.26 | 8.44E-01 | 1.72  | 8.50E-03 | 1.98  | 1.70E-03 |
| COMP       | 0.52  | 7.65E-01 | 1.69  | 2.06E-02 | 0.48  | 6.93E-01 | 1.17  | 2.20E-01 | -0.05 | 9.79E-01 | -1.21 | 1.26E-01 |
| COP22      | 0.27  | 5.40E-01 | 0.35  | 1.64E-01 | -0.72 | 5.34E-03 | 0.07  | 8.93E-01 | -0.99 | 1.99E-04 | -1.06 | 5.39E-05 |
| CPA4       | -0.94 | 3.30E-01 | -1.42 | 1.62E-02 | -0.91 | 2.03E-01 | -0.48 | 6.36E-01 | 0.03  | 9.83E-01 | 0.51  | 5.29E-01 |
| CPE        | 0.67  | 5.93E-01 | 1.62  | 9.76E-03 | -0.62 | 4.78E-01 | 0.95  | 2.58E-01 | -1.29 | 6.12E-02 | -2.24 | 8.11E-04 |
| CPXM2      | 0.03  | 9.93E-01 | 0.11  | 9.26E-01 | 2.43  | 1.16E-03 | 0.09  | 9.64E-01 | 2.41  | 1.06E-03 | 2.32  | 9.50E-04 |
| CRABP2     | 1.43  | 1.89E-01 | 2.37  | 1.39E-03 | 1.27  | 1.29E-01 | 0.95  | 3.59E-01 | -0.15 | 9.23E-01 | -1.10 | 1.75E-01 |
| CRISPLD1   | 0.29  | 9.07E-01 | 0.83  | 3.62E-01 | -0.95 | 3.45E-01 | 0.53  | 7.05E-01 | -1.24 | 1.67E-01 | -1.77 | 2.52E-02 |
| CSGALNACT1 | 0.13  | 9.37E-01 | -0.33 | 6.05E-01 | 0.68  | 2.34E-01 | -0.46 | 5.46E-01 | 0.55  | 3.62E-01 | 1.01  | 3.63E-02 |
| CSRP1      | 0.30  | 8.05E-01 | 0.23  | 7.59E-01 | -1.11 | 3.44E-02 | -0.07 | 9.60E-01 | -1.41 | 6.53E-03 | -1.34 | 6.60E-03 |
| CSRP2      | 0.37  | 7.19E-01 | 1.38  | 3.08E-03 | -0.87 | 9.68E-02 | 1.01  | 7.02E-02 | -1.25 | 1.30E-02 | -2.25 | 2.56E-05 |
| CTSC       | -0.10 | 9.32E-01 | 0.06  | 9.26E-01 | 3.28  | 1.52E-09 | 0.16  | 8.25E-01 | 3.38  | 8.08E-10 | 3.22  | 2.22E-09 |
| CTSD       | -0.47 | 5.54E-01 | -0.58 | 1.91E-01 | -1.51 | 1.14E-03 | -0.11 | 9.12E-01 | -1.05 | 1.89E-02 | -0.93 | 2.75E-02 |
| CXCL1      | 0.11  | 9.12E-01 | 0.50  | 1.14E-01 | 1.52  | 4.11E-05 | 0.39  | 3.64E-01 | 1.41  | 7.82E-05 | 1.01  | 1.58E-03 |
| CXCL12     | -0.12 | 9.31E-01 | -0.17 | 7.97E-01 | -1.09 | 1.27E-02 | -0.05 | 9.65E-01 | -0.97 | 2.44E-02 | -0.92 | 2.49E-02 |
| CXCL16     | -0.47 | 4.90E-01 | -0.24 | 6.56E-01 | -1.26 | 2.84E-03 | 0.23  | 7.42E-01 | -0.78 | 5.90E-02 | -1.01 | 8.97E-03 |
| CXCL2      | -0.03 | 9.88E-01 | -0.15 | 8.70E-01 | 1.99  | 6.38E-04 | -0.12 | 9.29E-01 | 2.02  | 4.49E-04 | 2.14  | 1.55E-04 |
| CYB5R1     | -0.06 | 9.54E-01 | -0.01 | 9.89E-01 | -1.00 | 1.90E-03 | 0.05  | 9.44E-01 | -0.94 | 2.75E-03 | -1.00 | 1.08E-03 |
| CYGB       | -0.99 | 5.17E-02 | -0.44 | 2.96E-01 | -1.62 | 1.93E-04 | 0.54  | 2.74E-01 | -0.63 | 1.36E-01 | -1.18 | 2.34E-03 |
| CYorf15A   | -0.07 | 9.53E-01 | -0.07 | 9.06E-01 | 1.31  | 4.02E-04 | 0.00  | 9.98E-01 | 1.39  | 1.80E-04 | 1.38  | 1.15E-04 |

|         |       |          |       |          |       |          |       |          |       |          |       |          |
|---------|-------|----------|-------|----------|-------|----------|-------|----------|-------|----------|-------|----------|
| CYP19A1 | -0.12 | 9.33E-01 | -0.16 | 8.15E-01 | 1.04  | 2.39E-02 | -0.04 | 9.73E-01 | 1.16  | 1.08E-02 | 1.20  | 5.58E-03 |
| DAAM1   | 0.73  | 1.30E-04 | 0.95  | 1.14E-06 | -0.12 | 5.80E-01 | 0.21  | 3.08E-01 | -0.86 | 5.06E-06 | -1.07 | 1.38E-07 |
| DACT1   | -0.05 | 9.87E-01 | 0.15  | 8.98E-01 | -1.75 | 1.42E-02 | 0.20  | 8.98E-01 | -1.70 | 1.56E-02 | -1.90 | 4.84E-03 |
| DAPK1   | 0.31  | 7.86E-01 | -0.32 | 6.30E-01 | -1.73 | 1.16E-03 | -0.63 | 3.39E-01 | -2.05 | 1.65E-04 | -1.42 | 3.88E-03 |
| DCBLD1  | -0.26 | 7.16E-01 | 0.44  | 2.02E-01 | -0.82 | 1.89E-02 | 0.70  | 6.65E-02 | -0.56 | 1.21E-01 | -1.26 | 2.81E-04 |
| DCUN1D3 | 0.52  | 9.79E-02 | 0.70  | 2.08E-03 | -0.51 | 3.86E-02 | 0.18  | 6.55E-01 | -1.03 | 7.52E-05 | -1.21 | 6.81E-06 |
| DDIT4   | -0.68 | 2.95E-01 | -1.12 | 5.67E-03 | -0.52 | 3.22E-01 | -0.44 | 4.83E-01 | 0.16  | 8.31E-01 | 0.60  | 1.84E-01 |
| DDIT4L  | 0.14  | 8.63E-01 | -0.19 | 6.24E-01 | 1.36  | 6.27E-05 | -0.33 | 4.28E-01 | 1.22  | 1.76E-04 | 1.56  | 5.59E-06 |
| DDX3Y   | 0.14  | 9.62E-01 | 0.12  | 9.39E-01 | 4.24  | 3.45E-05 | -0.02 | 9.94E-01 | 4.10  | 4.14E-05 | 4.12  | 2.34E-05 |
| DDX43   | 0.17  | 8.84E-01 | 0.15  | 8.07E-01 | 1.06  | 1.08E-02 | -0.01 | 9.91E-01 | 0.89  | 3.05E-02 | 0.91  | 2.04E-02 |
| DDX58   | 0.67  | 4.18E-01 | 1.99  | 1.40E-04 | 0.46  | 5.05E-01 | 1.32  | 1.88E-02 | -0.22 | 8.07E-01 | -1.53 | 2.44E-03 |
| DDX60   | 0.26  | 8.29E-01 | 1.54  | 1.10E-03 | 0.29  | 7.13E-01 | 1.28  | 1.66E-02 | 0.02  | 9.83E-01 | -1.26 | 8.37E-03 |
| DDX60L  | 0.01  | 9.98E-01 | 1.14  | 1.31E-02 | 0.41  | 5.50E-01 | 1.13  | 3.53E-02 | 0.40  | 5.59E-01 | -0.73 | 1.48E-01 |
| DEPDC6  | 0.15  | 9.62E-01 | 0.04  | 9.84E-01 | -3.35 | 7.16E-04 | -0.11 | 9.65E-01 | -3.49 | 3.80E-04 | -3.38 | 3.44E-04 |
| DGKH    | -0.22 | 6.69E-01 | -0.20 | 5.11E-01 | 1.05  | 1.95E-04 | 0.01  | 9.87E-01 | 1.26  | 1.36E-05 | 1.25  | 1.10E-05 |
| DGKI    | -0.11 | 9.34E-01 | 0.54  | 2.24E-01 | 0.89  | 4.95E-02 | 0.66  | 2.12E-01 | 1.00  | 2.33E-02 | 0.34  | 5.45E-01 |
| DHFR    | -0.75 | 3.86E-01 | -1.22 | 1.72E-02 | -0.11 | 9.28E-01 | -0.47 | 5.83E-01 | 0.64  | 3.25E-01 | 1.11  | 3.61E-02 |
| DHRS3   | -0.79 | 1.96E-01 | -1.70 | 1.21E-04 | 0.08  | 9.33E-01 | -0.91 | 6.24E-02 | 0.87  | 5.07E-02 | 1.79  | 9.46E-05 |
| DKK1    | -1.22 | 3.81E-01 | -1.73 | 3.87E-02 | -1.06 | 3.25E-01 | -0.51 | 7.45E-01 | 0.17  | 9.28E-01 | 0.68  | 5.66E-01 |
| DLEU2   | -0.07 | 9.56E-01 | -0.30 | 4.97E-01 | 1.39  | 5.19E-04 | -0.23 | 7.23E-01 | 1.46  | 2.30E-04 | 1.69  | 2.59E-05 |
| DLGAP5  | -1.80 | 1.56E-01 | -2.99 | 8.20E-04 | -0.02 | 9.94E-01 | -1.19 | 3.23E-01 | 1.78  | 6.28E-02 | 2.97  | 1.18E-03 |
| DLX3    | -1.06 | 2.20E-01 | -1.26 | 2.66E-02 | -1.14 | 7.33E-02 | -0.19 | 8.83E-01 | -0.07 | 9.55E-01 | 0.12  | 9.18E-01 |
| DLX5    | -0.64 | 6.51E-01 | -0.39 | 7.00E-01 | -1.55 | 4.08E-02 | 0.25  | 8.75E-01 | -0.91 | 2.83E-01 | -1.15 | 1.17E-01 |
| DMD     | 0.32  | 7.79E-01 | 0.11  | 8.98E-01 | -1.03 | 4.91E-02 | -0.21 | 8.32E-01 | -1.35 | 8.40E-03 | -1.14 | 1.89E-02 |
| DNM1    | -0.12 | 8.94E-01 | -0.05 | 9.19E-01 | 0.89  | 4.32E-03 | 0.06  | 9.30E-01 | 1.00  | 1.21E-03 | 0.94  | 1.42E-03 |
| DOCK11  | -0.47 | 3.00E-01 | -0.69 | 1.45E-02 | 0.78  | 1.23E-02 | -0.22 | 6.56E-01 | 1.24  | 1.41E-04 | 1.47  | 1.17E-05 |
| DOK6    | 0.26  | 6.37E-01 | 0.66  | 1.40E-02 | -0.43 | 1.74E-01 | 0.39  | 2.74E-01 | -0.69 | 1.71E-02 | -1.09 | 2.17E-04 |
| DSG2    | -0.42 | 5.99E-01 | -0.40 | 4.20E-01 | 1.96  | 5.36E-05 | 0.03  | 9.84E-01 | 2.38  | 3.29E-06 | 2.36  | 2.65E-06 |
| DTX3L   | 0.22  | 8.36E-01 | 1.16  | 3.94E-03 | 0.40  | 4.79E-01 | 0.94  | 4.52E-02 | 0.18  | 8.08E-01 | -0.76 | 7.05E-02 |
| DUSP10  | -0.63 | 2.83E-01 | -1.14 | 2.29E-03 | -2.50 | 5.50E-07 | -0.51 | 3.14E-01 | -1.88 | 2.22E-05 | -1.36 | 5.87E-04 |
| DYNC2H1 | -0.53 | 3.54E-01 | -1.04 | 2.69E-03 | -0.43 | 3.36E-01 | -0.51 | 2.64E-01 | 0.10  | 8.87E-01 | 0.61  | 9.43E-02 |
| E2F8    | -0.22 | 8.77E-01 | -0.36 | 5.81E-01 | 0.78  | 1.65E-01 | -0.14 | 9.08E-01 | 1.00  | 5.63E-02 | 1.14  | 2.08E-02 |
| EBP     | 0.79  | 2.08E-01 | 0.53  | 2.43E-01 | -0.35 | 5.71E-01 | -0.25 | 7.45E-01 | -1.13 | 1.12E-02 | -0.88 | 3.89E-02 |
| EDN1    | -0.12 | 9.52E-01 | -1.49 | 4.17E-03 | -1.16 | 4.32E-02 | -1.37 | 2.22E-02 | -1.04 | 6.89E-02 | 0.33  | 6.83E-01 |

|          |       |          |       |          |       |          |       |          |       |          |       |          |
|----------|-------|----------|-------|----------|-------|----------|-------|----------|-------|----------|-------|----------|
| EDNRA    | 0.23  | 9.22E-01 | 0.38  | 7.12E-01 | -1.53 | 4.46E-02 | 0.16  | 9.30E-01 | -1.76 | 1.87E-02 | -1.91 | 7.22E-03 |
| EFHD1    | 0.03  | 9.89E-01 | 0.44  | 5.16E-01 | -0.92 | 1.30E-01 | 0.41  | 6.58E-01 | -0.95 | 1.09E-01 | -1.36 | 1.17E-02 |
| EFTUD1   | -0.55 | 4.15E-01 | -0.09 | 8.96E-01 | 0.48  | 3.46E-01 | 0.46  | 4.35E-01 | 1.04  | 1.51E-02 | 0.58  | 1.91E-01 |
| EGR2     | 1.52  | 9.61E-02 | 1.37  | 3.50E-02 | -0.92 | 2.46E-01 | -0.15 | 9.27E-01 | -2.44 | 7.05E-04 | -2.28 | 8.59E-04 |
| EIF1AY   | 0.02  | 9.97E-01 | 0.02  | 9.92E-01 | 4.49  | 2.58E-05 | 0.00  | 1.00E+00 | 4.47  | 1.98E-05 | 4.47  | 1.32E-05 |
| ELK3     | -0.19 | 8.11E-01 | -0.07 | 9.05E-01 | 0.82  | 1.56E-02 | 0.12  | 8.62E-01 | 1.01  | 2.84E-03 | 0.89  | 5.58E-03 |
| ELMO1    | 0.36  | 6.63E-01 | 0.06  | 9.32E-01 | 1.08  | 1.20E-02 | -0.29 | 6.73E-01 | 0.72  | 1.01E-01 | 1.01  | 1.16E-02 |
| ELTD1    | 0.00  | 9.99E-01 | 0.14  | 9.04E-01 | -1.66 | 2.01E-02 | 0.15  | 9.30E-01 | -1.66 | 1.88E-02 | -1.81 | 7.26E-03 |
| EMB      | 0.01  | 9.98E-01 | 0.36  | 2.84E-01 | -1.26 | 2.36E-04 | 0.35  | 4.18E-01 | -1.27 | 1.81E-04 | -1.62 | 5.59E-06 |
| EMP2     | -0.40 | 2.92E-01 | -1.00 | 9.68E-05 | 0.63  | 1.53E-02 | -0.61 | 2.71E-02 | 1.03  | 1.67E-04 | 1.63  | 2.18E-07 |
| ENO2     | -1.30 | 2.22E-03 | -1.69 | 1.32E-05 | -1.02 | 5.41E-03 | -0.39 | 4.17E-01 | 0.28  | 5.63E-01 | 0.68  | 4.84E-02 |
| ENOX1    | 0.59  | 5.27E-01 | 1.05  | 3.28E-02 | 0.68  | 2.65E-01 | 0.47  | 5.67E-01 | 0.09  | 9.32E-01 | -0.37 | 6.04E-01 |
| ENPP4    | -0.04 | 9.78E-01 | 0.20  | 6.74E-01 | -0.86 | 1.81E-02 | 0.24  | 6.88E-01 | -0.83 | 2.18E-02 | -1.07 | 2.16E-03 |
| ENTPD1   | 0.46  | 6.38E-01 | 0.42  | 4.78E-01 | -0.56 | 3.72E-01 | -0.04 | 9.81E-01 | -1.01 | 4.90E-02 | -0.98 | 4.52E-02 |
| ENTPD7   | 0.23  | 7.95E-01 | 1.31  | 5.17E-04 | 0.10  | 8.94E-01 | 1.08  | 1.02E-02 | -0.13 | 8.53E-01 | -1.21 | 1.56E-03 |
| EPB41L4A | 0.23  | 8.20E-01 | -0.01 | 9.86E-01 | 1.57  | 6.09E-04 | -0.25 | 7.42E-01 | 1.34  | 2.42E-03 | 1.58  | 2.92E-04 |
| EPGN     | 0.47  | 7.87E-01 | 2.32  | 1.39E-03 | 2.88  | 4.26E-04 | 1.84  | 2.52E-02 | 2.41  | 2.05E-03 | 0.56  | 5.81E-01 |
| EPHA3    | -0.07 | 9.81E-01 | 0.91  | 2.24E-01 | -1.67 | 2.57E-02 | 0.97  | 2.93E-01 | -1.60 | 2.98E-02 | -2.58 | 4.47E-04 |
| EPHB1    | -0.33 | 5.74E-01 | -0.28 | 4.38E-01 | 1.16  | 6.09E-04 | 0.04  | 9.60E-01 | 1.49  | 2.64E-05 | 1.44  | 2.48E-05 |
| EPSTI1   | 0.20  | 8.64E-01 | 1.82  | 5.39E-05 | 0.28  | 6.62E-01 | 1.63  | 1.07E-03 | 0.08  | 9.23E-01 | -1.54 | 4.10E-04 |
| ERCC6    | 0.67  | 1.79E-01 | 1.51  | 5.91E-05 | -1.03 | 5.98E-03 | 0.84  | 3.38E-02 | -1.70 | 2.62E-05 | -2.53 | 6.68E-08 |
| ERG      | -0.39 | 8.08E-01 | -0.55 | 4.99E-01 | 1.66  | 1.77E-02 | -0.16 | 9.19E-01 | 2.05  | 3.17E-03 | 2.21  | 1.04E-03 |
| ERMN     | 0.56  | 5.42E-01 | 1.90  | 1.86E-04 | -0.65 | 2.72E-01 | 1.35  | 1.39E-02 | -1.21 | 1.92E-02 | -2.55 | 7.17E-06 |
| ERRFI1   | -0.42 | 4.60E-01 | -1.39 | 7.32E-05 | -0.36 | 4.04E-01 | -0.97 | 8.85E-03 | 0.06  | 9.32E-01 | 1.03  | 1.94E-03 |
| ESCO2    | -0.25 | 9.12E-01 | -0.28 | 7.98E-01 | 1.18  | 1.31E-01 | -0.04 | 9.86E-01 | 1.42  | 5.48E-02 | 1.46  | 3.61E-02 |
| ESM1     | -0.35 | 8.24E-01 | -1.11 | 7.82E-02 | 1.42  | 3.51E-02 | -0.76 | 4.00E-01 | 1.78  | 7.63E-03 | 2.53  | 1.77E-04 |
| ETS1     | -0.47 | 2.63E-01 | -0.68 | 1.14E-02 | 0.42  | 1.94E-01 | -0.20 | 6.68E-01 | 0.89  | 2.49E-03 | 1.09  | 2.09E-04 |
| ETS2     | -0.13 | 9.34E-01 | -0.36 | 5.45E-01 | 1.74  | 6.35E-04 | -0.23 | 7.99E-01 | 1.87  | 2.45E-04 | 2.10  | 3.94E-05 |
| ETV1     | -0.05 | 9.87E-01 | -0.20 | 8.70E-01 | 1.75  | 2.20E-02 | -0.16 | 9.31E-01 | 1.80  | 1.71E-02 | 1.96  | 6.64E-03 |
| EXOSC8   | -0.06 | 9.70E-01 | 0.26  | 6.52E-01 | 0.97  | 2.74E-02 | 0.31  | 6.56E-01 | 1.03  | 1.79E-02 | 0.72  | 9.40E-02 |
| EYA1     | 0.16  | 9.25E-01 | 0.01  | 9.95E-01 | -1.31 | 1.74E-02 | -0.15 | 8.98E-01 | -1.47 | 6.99E-03 | -1.32 | 1.07E-02 |
| EZH2     | -0.62 | 3.45E-01 | -0.51 | 2.60E-01 | 0.69  | 1.37E-01 | 0.12  | 9.03E-01 | 1.32  | 2.74E-03 | 1.20  | 4.09E-03 |
| F2RL2    | -0.94 | 2.43E-01 | -0.89 | 9.74E-02 | 0.95  | 1.06E-01 | 0.05  | 9.77E-01 | 1.89  | 1.02E-03 | 1.84  | 8.19E-04 |
| FADS1    | 1.11  | 1.11E-01 | 1.28  | 8.09E-03 | 0.86  | 1.23E-01 | 0.17  | 8.81E-01 | -0.25 | 7.68E-01 | -0.42 | 5.33E-01 |



|          |       |          |       |          |       |          |       |          |       |          |       |          |
|----------|-------|----------|-------|----------|-------|----------|-------|----------|-------|----------|-------|----------|
| FADS2    | 1.71  | 2.38E-02 | 1.75  | 2.40E-03 | 0.83  | 2.37E-01 | 0.05  | 9.79E-01 | -0.88 | 1.91E-01 | -0.93 | 1.36E-01 |
| FAM111B  | -1.26 | 3.61E-01 | -1.53 | 7.28E-02 | 0.61  | 6.42E-01 | -0.27 | 8.93E-01 | 1.87  | 3.89E-02 | 2.14  | 1.25E-02 |
| FAM129A  | -0.38 | 8.17E-01 | 0.03  | 9.84E-01 | 1.71  | 1.41E-02 | 0.41  | 7.34E-01 | 2.09  | 2.64E-03 | 1.68  | 1.01E-02 |
| FAM151B  | 0.38  | 4.52E-01 | 0.91  | 1.80E-03 | -0.69 | 2.79E-02 | 0.53  | 1.39E-01 | -1.07 | 7.66E-04 | -1.60 | 4.64E-06 |
| FAM180A  | -1.15 | 3.40E-03 | -0.81 | 7.43E-03 | 0.59  | 8.39E-02 | 0.34  | 4.65E-01 | 1.74  | 4.83E-06 | 1.40  | 4.90E-05 |
| FAM198B  | 0.49  | 5.58E-01 | 0.73  | 1.07E-01 | -0.77 | 1.23E-01 | 0.24  | 7.80E-01 | -1.26 | 7.54E-03 | -1.50 | 1.08E-03 |
| FAM20C   | -0.18 | 6.41E-01 | -0.23 | 2.81E-01 | 0.85  | 1.29E-04 | -0.05 | 9.17E-01 | 1.04  | 8.62E-06 | 1.08  | 3.50E-06 |
| FAM26E   | 0.35  | 6.10E-01 | 0.59  | 9.20E-02 | -1.23 | 1.28E-03 | 0.24  | 6.94E-01 | -1.58 | 6.99E-05 | -1.82 | 7.17E-06 |
| FAM49A   | -0.07 | 9.75E-01 | -0.14 | 8.96E-01 | 1.76  | 5.23E-03 | -0.07 | 9.69E-01 | 1.83  | 3.19E-03 | 1.89  | 1.52E-03 |
| FAM54A   | -0.84 | 5.11E-01 | -1.07 | 1.42E-01 | 1.00  | 2.39E-01 | -0.23 | 8.84E-01 | 1.84  | 1.42E-02 | 2.07  | 3.92E-03 |
| FAM69A   | 0.25  | 6.38E-01 | 0.25  | 4.28E-01 | -1.06 | 3.59E-04 | 0.00  | 1.00E+00 | -1.31 | 2.16E-05 | -1.31 | 1.45E-05 |
| FAM72D   | -0.48 | 6.45E-01 | -0.76 | 1.60E-01 | 0.60  | 3.68E-01 | -0.28 | 7.81E-01 | 1.08  | 5.07E-02 | 1.36  | 9.15E-03 |
| FAM72D   | -0.50 | 6.46E-01 | -0.79 | 1.67E-01 | 0.62  | 3.79E-01 | -0.28 | 7.88E-01 | 1.12  | 5.41E-02 | 1.41  | 1.01E-02 |
| FAM72D   | -0.55 | 5.99E-01 | -0.79 | 1.62E-01 | 0.63  | 3.66E-01 | -0.23 | 8.37E-01 | 1.18  | 3.92E-02 | 1.41  | 9.21E-03 |
| FAM72D   | -0.63 | 6.28E-01 | -0.81 | 2.52E-01 | 0.87  | 2.72E-01 | -0.18 | 9.09E-01 | 1.50  | 2.94E-02 | 1.68  | 1.02E-02 |
| FANCD2   | -0.26 | 8.48E-01 | -0.27 | 7.23E-01 | 0.74  | 2.14E-01 | -0.01 | 9.96E-01 | 1.00  | 6.70E-02 | 1.01  | 4.97E-02 |
| FANK1    | -0.04 | 9.67E-01 | -0.12 | 7.96E-01 | -1.47 | 1.69E-05 | -0.07 | 9.13E-01 | -1.43 | 1.53E-05 | -1.35 | 2.04E-05 |
| FBLN1    | -0.23 | 8.85E-01 | -0.58 | 3.50E-01 | 0.98  | 1.08E-01 | -0.35 | 7.26E-01 | 1.21  | 3.67E-02 | 1.56  | 4.84E-03 |
| FBLN2    | -0.01 | 9.95E-01 | -0.13 | 8.18E-01 | 0.88  | 1.46E-02 | -0.11 | 8.79E-01 | 0.89  | 1.21E-02 | 1.01  | 3.24E-03 |
| FBLN5    | 0.45  | 4.39E-01 | 0.74  | 2.89E-02 | -0.39 | 3.88E-01 | 0.28  | 6.19E-01 | -0.84 | 2.08E-02 | -1.12 | 1.46E-03 |
| FBXL5    | 1.00  | 2.05E-05 | 0.92  | 9.65E-06 | -0.18 | 4.68E-01 | -0.08 | 8.32E-01 | -1.18 | 5.42E-07 | -1.10 | 1.06E-06 |
| FBXO16   | 0.25  | 8.19E-01 | 0.74  | 8.62E-02 | -1.13 | 1.43E-02 | 0.50  | 4.25E-01 | -1.37 | 2.72E-03 | -1.87 | 7.34E-05 |
| FBXO5    | -0.39 | 7.37E-01 | -0.74 | 1.79E-01 | 1.13  | 4.43E-02 | -0.34 | 7.14E-01 | 1.52  | 5.81E-03 | 1.87  | 6.12E-04 |
| FDPS     | 1.24  | 3.76E-02 | 1.02  | 2.11E-02 | 0.06  | 9.54E-01 | -0.22 | 8.08E-01 | -1.17 | 1.42E-02 | -0.96 | 3.66E-02 |
| FERMT1   | -0.02 | 9.88E-01 | 0.17  | 6.11E-01 | 1.01  | 2.28E-04 | 0.18  | 6.63E-01 | 1.03  | 1.57E-04 | 0.85  | 7.55E-04 |
| FGD6     | -0.17 | 9.23E-01 | -0.40 | 5.65E-01 | 1.38  | 1.64E-02 | -0.23 | 8.37E-01 | 1.55  | 6.34E-03 | 1.78  | 1.25E-03 |
| FGF7     | 0.07  | 9.38E-01 | -0.21 | 5.39E-01 | -1.13 | 2.40E-04 | -0.28 | 4.92E-01 | -1.20 | 9.56E-05 | -0.91 | 1.06E-03 |
| FGL2     | -0.49 | 9.01E-01 | 2.42  | 5.03E-02 | 3.96  | 3.59E-03 | 2.91  | 4.20E-02 | 4.45  | 1.03E-03 | 1.54  | 2.89E-01 |
| FIBIN    | -0.03 | 9.87E-01 | -0.39 | 4.49E-01 | 0.72  | 1.38E-01 | -0.36 | 6.07E-01 | 0.75  | 1.14E-01 | 1.11  | 9.84E-03 |
| FIGN     | 0.13  | 8.87E-01 | 0.14  | 7.63E-01 | -1.43 | 7.59E-05 | 0.01  | 9.91E-01 | -1.56 | 1.81E-05 | -1.57 | 1.12E-05 |
| FILIP1   | 0.17  | 8.18E-01 | 1.22  | 1.02E-04 | -0.10 | 8.66E-01 | 1.05  | 2.38E-03 | -0.27 | 5.11E-01 | -1.32 | 5.34E-05 |
| FKBP14   | 0.51  | 5.22E-02 | 1.07  | 4.48E-06 | -0.15 | 6.23E-01 | 0.55  | 1.30E-02 | -0.66 | 1.89E-03 | -1.22 | 1.06E-06 |
| FLG      | 0.73  | 7.29E-01 | 1.70  | 7.49E-02 | -1.58 | 1.46E-01 | 0.97  | 5.11E-01 | -2.31 | 2.19E-02 | -3.28 | 8.99E-04 |
| FLJ39632 | -0.35 | 5.94E-01 | 0.05  | 9.30E-01 | -1.17 | 1.57E-03 | 0.40  | 4.02E-01 | -0.82 | 2.09E-02 | -1.22 | 5.30E-04 |

|          |       |          |       |          |       |          |       |          |       |          |       |          |
|----------|-------|----------|-------|----------|-------|----------|-------|----------|-------|----------|-------|----------|
| FLJ39632 | -0.33 | 6.19E-01 | 0.08  | 8.98E-01 | -1.08 | 2.98E-03 | 0.40  | 3.92E-01 | -0.75 | 3.36E-02 | -1.15 | 8.34E-04 |
| FLNB     | -0.37 | 6.38E-01 | -1.27 | 1.06E-03 | -1.04 | 1.24E-02 | -0.90 | 4.20E-02 | -0.67 | 1.19E-01 | 0.23  | 6.98E-01 |
| FLRT2    | -0.06 | 9.80E-01 | 0.18  | 8.67E-01 | 1.25  | 5.47E-02 | 0.23  | 8.56E-01 | 1.31  | 3.96E-02 | 1.08  | 8.15E-02 |
| FMN1     | -0.08 | 9.67E-01 | 0.36  | 6.07E-01 | 1.57  | 4.78E-03 | 0.43  | 6.10E-01 | 1.65  | 2.68E-03 | 1.22  | 1.86E-02 |
| FMNL2    | -0.16 | 8.00E-01 | -0.02 | 9.74E-01 | 1.30  | 2.22E-05 | 0.14  | 7.72E-01 | 1.46  | 3.65E-06 | 1.32  | 8.46E-06 |
| FNIP2    | -0.30 | 8.47E-01 | 0.39  | 6.23E-01 | -1.20 | 5.75E-02 | 0.69  | 4.07E-01 | -0.90 | 1.74E-01 | -1.58 | 6.78E-03 |
| FOSL1    | -0.15 | 7.72E-01 | -0.39 | 7.96E-02 | 0.61  | 1.06E-02 | -0.24 | 4.72E-01 | 0.77  | 1.51E-03 | 1.01  | 5.04E-05 |
| FOXM1    | -0.80 | 3.50E-01 | -1.10 | 3.52E-02 | 0.81  | 1.95E-01 | -0.30 | 7.68E-01 | 1.61  | 4.43E-03 | 1.91  | 6.27E-04 |
| FOXN3    | -0.06 | 9.57E-01 | -0.53 | 1.08E-01 | 0.89  | 9.41E-03 | -0.46 | 2.72E-01 | 0.96  | 4.91E-03 | 1.42  | 5.96E-05 |
| FRMD4A   | 0.36  | 4.15E-01 | 0.41  | 1.32E-01 | -0.88 | 2.46E-03 | 0.05  | 9.45E-01 | -1.24 | 5.22E-05 | -1.29 | 1.92E-05 |
| FRMD4B   | 0.06  | 9.77E-01 | -0.11 | 9.18E-01 | 2.00  | 1.09E-03 | -0.17 | 8.98E-01 | 1.94  | 1.21E-03 | 2.11  | 3.35E-04 |
| FRMPD3   | -0.03 | 9.85E-01 | -0.12 | 8.61E-01 | 0.94  | 2.77E-02 | -0.09 | 9.28E-01 | 0.97  | 2.09E-02 | 1.06  | 8.15E-03 |
| FRRS1    | -0.06 | 9.63E-01 | -0.51 | 2.27E-01 | -1.29 | 2.66E-03 | -0.45 | 4.34E-01 | -1.23 | 3.33E-03 | -0.78 | 5.06E-02 |
| FRZB     | 0.22  | 8.70E-01 | -0.43 | 4.51E-01 | -0.82 | 1.21E-01 | -0.65 | 3.04E-01 | -1.04 | 3.81E-02 | -0.39 | 5.43E-01 |
| GABBR2   | 0.12  | 9.18E-01 | -0.04 | 9.57E-01 | 1.34  | 6.09E-04 | -0.15 | 8.34E-01 | 1.22  | 1.24E-03 | 1.38  | 2.41E-04 |
| GALNT13  | -0.02 | 9.93E-01 | 0.04  | 9.62E-01 | 1.80  | 5.70E-05 | 0.05  | 9.60E-01 | 1.82  | 3.92E-05 | 1.76  | 3.35E-05 |
| GAP43    | 1.07  | 1.07E-01 | 1.23  | 7.89E-03 | -0.14 | 8.88E-01 | 0.16  | 8.84E-01 | -1.21 | 1.62E-02 | -1.37 | 4.60E-03 |
| GCH1     | 0.15  | 9.54E-01 | 0.68  | 4.04E-01 | 1.51  | 4.39E-02 | 0.54  | 6.51E-01 | 1.37  | 6.88E-02 | 0.83  | 3.11E-01 |
| GCLC     | -0.06 | 9.57E-01 | 0.16  | 7.30E-01 | 1.24  | 3.94E-04 | 0.22  | 6.85E-01 | 1.30  | 1.86E-04 | 1.08  | 8.29E-04 |
| GCLM     | 0.83  | 8.17E-02 | 1.38  | 1.49E-04 | 1.18  | 1.92E-03 | 0.55  | 2.10E-01 | 0.34  | 4.59E-01 | -0.20 | 7.03E-01 |
| GCNT4    | 0.53  | 5.00E-01 | -0.45 | 3.68E-01 | -1.65 | 6.46E-04 | -0.98 | 5.06E-02 | -2.17 | 2.07E-05 | -1.19 | 6.58E-03 |
| GCOM1    | 0.03  | 9.87E-01 | -0.04 | 9.63E-01 | 1.17  | 5.48E-03 | -0.06 | 9.54E-01 | 1.14  | 5.74E-03 | 1.20  | 2.46E-03 |
| GDF15    | -0.52 | 4.17E-01 | -1.03 | 5.25E-03 | -0.48 | 3.15E-01 | -0.51 | 3.15E-01 | 0.04  | 9.60E-01 | 0.55  | 1.79E-01 |
| GFPT2    | 0.07  | 9.78E-01 | -0.33 | 7.51E-01 | 1.64  | 2.74E-02 | -0.41 | 7.51E-01 | 1.56  | 3.27E-02 | 1.97  | 4.86E-03 |
| GFRA1    | 0.37  | 7.74E-01 | 0.65  | 2.78E-01 | 2.29  | 2.28E-04 | 0.28  | 7.90E-01 | 1.92  | 1.14E-03 | 1.64  | 3.16E-03 |
| GK       | 0.12  | 9.30E-01 | 0.12  | 8.70E-01 | 1.03  | 2.58E-02 | 0.00  | 9.99E-01 | 0.90  | 4.89E-02 | 0.90  | 3.68E-02 |
| GLIPR2   | 0.73  | 1.61E-02 | 0.70  | 2.50E-03 | -0.60 | 1.78E-02 | -0.03 | 9.66E-01 | -1.33 | 4.25E-06 | -1.30 | 4.01E-06 |
| GLIS3    | -0.04 | 9.84E-01 | 0.23  | 7.67E-01 | 1.33  | 1.28E-02 | 0.27  | 7.77E-01 | 1.37  | 9.61E-03 | 1.10  | 2.83E-02 |
| GLRB     | 0.53  | 3.04E-01 | 1.04  | 1.66E-03 | 0.24  | 6.38E-01 | 0.51  | 2.33E-01 | -0.29 | 5.35E-01 | -0.80 | 1.68E-02 |
| GLT8D2   | 0.59  | 4.09E-01 | 0.62  | 1.64E-01 | 1.07  | 1.89E-02 | 0.03  | 9.82E-01 | 0.48  | 3.73E-01 | 0.45  | 3.87E-01 |
| GLUL     | -0.09 | 8.96E-01 | -0.54 | 1.60E-02 | 0.62  | 1.23E-02 | -0.45 | 1.04E-01 | 0.71  | 3.63E-03 | 1.16  | 1.30E-05 |
| GLUL     | -0.21 | 7.86E-01 | -0.82 | 1.01E-02 | 0.97  | 5.98E-03 | -0.61 | 1.24E-01 | 1.18  | 8.84E-04 | 1.79  | 4.64E-06 |
| GLYATL2  | -0.12 | 8.95E-01 | -0.37 | 2.52E-01 | 0.85  | 7.47E-03 | -0.25 | 6.10E-01 | 0.97  | 2.17E-03 | 1.22  | 1.39E-04 |
| GMFG     | -0.90 | 1.54E-01 | -1.65 | 2.99E-04 | -2.07 | 6.27E-05 | -0.75 | 1.70E-01 | -1.17 | 1.21E-02 | -0.42 | 4.52E-01 |

|           |       |          |       |          |       |          |       |          |       |          |       |          |
|-----------|-------|----------|-------|----------|-------|----------|-------|----------|-------|----------|-------|----------|
| GNPDA1    | -0.76 | 1.69E-01 | -1.04 | 5.71E-03 | -0.13 | 8.62E-01 | -0.28 | 6.85E-01 | 0.63  | 1.48E-01 | 0.90  | 1.98E-02 |
| GPR126    | -0.10 | 9.59E-01 | 0.04  | 9.69E-01 | 2.10  | 4.41E-04 | 0.14  | 9.13E-01 | 2.20  | 2.12E-04 | 2.06  | 2.79E-04 |
| GPR137C   | -0.15 | 9.09E-01 | -0.12 | 8.67E-01 | 0.99  | 2.37E-02 | 0.03  | 9.82E-01 | 1.14  | 8.66E-03 | 1.11  | 7.10E-03 |
| GPR155    | 0.22  | 8.55E-01 | 1.07  | 1.35E-02 | -0.23 | 7.67E-01 | 0.85  | 1.12E-01 | -0.45 | 4.50E-01 | -1.30 | 4.03E-03 |
| GPRC5A    | -0.28 | 8.33E-01 | -1.84 | 4.69E-04 | 0.55  | 4.24E-01 | -1.56 | 8.28E-03 | 0.83  | 1.55E-01 | 2.38  | 3.47E-05 |
| GPX7      | 0.48  | 3.88E-01 | 0.74  | 2.30E-02 | -0.42 | 3.18E-01 | 0.27  | 6.35E-01 | -0.89 | 1.17E-02 | -1.16 | 8.45E-04 |
| GRB14     | 0.50  | 5.00E-01 | 1.38  | 7.73E-04 | 0.56  | 2.56E-01 | 0.89  | 6.22E-02 | 0.07  | 9.41E-01 | -0.82 | 4.69E-02 |
| GREM2     | -0.57 | 4.16E-01 | -0.72 | 8.68E-02 | 1.01  | 2.40E-02 | -0.15 | 8.70E-01 | 1.57  | 5.37E-04 | 1.72  | 1.31E-04 |
| GRIA3     | -0.02 | 9.87E-01 | 0.51  | 8.52E-02 | -0.69 | 2.72E-02 | 0.53  | 1.37E-01 | -0.67 | 2.96E-02 | -1.20 | 1.44E-04 |
| GRIK2     | 0.01  | 9.98E-01 | 0.38  | 7.31E-01 | -1.52 | 5.51E-02 | 0.36  | 8.01E-01 | -1.53 | 4.91E-02 | -1.90 | 9.76E-03 |
| GSTM3     | 0.52  | 2.13E-01 | 0.27  | 4.09E-01 | -1.11 | 4.06E-04 | -0.24 | 5.91E-01 | -1.62 | 3.22E-06 | -1.38 | 1.52E-05 |
| GSTP1     | -0.11 | 9.14E-01 | -0.12 | 8.14E-01 | -1.01 | 4.00E-03 | -0.01 | 9.91E-01 | -0.90 | 9.05E-03 | -0.88 | 6.78E-03 |
| GUCY1B3   | 1.18  | 2.13E-01 | 1.90  | 2.43E-03 | -0.82 | 2.95E-01 | 0.72  | 4.33E-01 | -2.00 | 3.14E-03 | -2.72 | 8.89E-05 |
| GXYLT2    | 0.77  | 1.97E-01 | 0.87  | 2.82E-02 | -0.76 | 8.82E-02 | 0.10  | 9.17E-01 | -1.52 | 5.58E-04 | -1.63 | 1.82E-04 |
| GYPC      | -0.12 | 9.22E-01 | -0.76 | 4.27E-02 | 0.58  | 1.92E-01 | -0.63 | 1.77E-01 | 0.70  | 9.18E-02 | 1.33  | 7.48E-04 |
| HELLS     | -0.91 | 3.85E-01 | -0.79 | 2.51E-01 | 0.78  | 3.28E-01 | 0.11  | 9.45E-01 | 1.69  | 1.20E-02 | 1.57  | 1.36E-02 |
| HERC6     | 0.15  | 9.49E-01 | 3.02  | 3.10E-05 | 0.09  | 9.55E-01 | 2.87  | 3.81E-04 | -0.06 | 9.65E-01 | -2.93 | 5.22E-05 |
| HEY2      | 0.53  | 5.85E-01 | 0.78  | 1.38E-01 | -0.38 | 6.23E-01 | 0.24  | 8.11E-01 | -0.91 | 1.03E-01 | -1.15 | 2.36E-02 |
| HGF       | 0.60  | 6.94E-01 | 0.22  | 8.57E-01 | -1.59 | 3.89E-02 | -0.37 | 7.87E-01 | -2.18 | 3.87E-03 | -1.81 | 1.14E-02 |
| HHIP      | -0.40 | 7.78E-01 | -0.43 | 5.94E-01 | 1.23  | 6.29E-02 | -0.03 | 9.89E-01 | 1.63  | 1.10E-02 | 1.66  | 6.74E-03 |
| HIST1H1A  | -0.57 | 7.04E-01 | -0.94 | 2.08E-01 | 0.48  | 6.67E-01 | -0.37 | 7.88E-01 | 1.05  | 1.96E-01 | 1.42  | 4.67E-02 |
| HIST1H1D  | -0.49 | 6.23E-01 | -0.83 | 1.03E-01 | 1.20  | 2.67E-02 | -0.34 | 7.04E-01 | 1.69  | 1.79E-03 | 2.03  | 1.73E-04 |
| HIST1H1E  | -0.68 | 2.18E-01 | -0.96 | 7.56E-03 | 0.33  | 5.19E-01 | -0.28 | 6.60E-01 | 1.01  | 9.76E-03 | 1.29  | 7.70E-04 |
| HIST1H2BH | -0.36 | 7.88E-01 | -0.60 | 3.41E-01 | 0.80  | 2.31E-01 | -0.24 | 8.34E-01 | 1.16  | 5.32E-02 | 1.40  | 1.25E-02 |
| HIST1H3B  | -0.46 | 8.06E-01 | -0.63 | 5.17E-01 | 1.17  | 1.86E-01 | -0.16 | 9.32E-01 | 1.64  | 4.48E-02 | 1.80  | 1.90E-02 |
| HIST1H3I  | -1.11 | 1.27E-01 | -1.87 | 3.79E-04 | 0.42  | 5.70E-01 | -0.76 | 2.52E-01 | 1.53  | 4.81E-03 | 2.29  | 5.27E-05 |
| HIST1H4C  | -0.62 | 4.99E-01 | -1.16 | 1.98E-02 | 0.27  | 7.55E-01 | -0.54 | 4.89E-01 | 0.89  | 1.14E-01 | 1.43  | 5.58E-03 |
| HIST2H2AB | -0.15 | 8.83E-01 | -0.51 | 1.49E-01 | 0.56  | 1.54E-01 | -0.36 | 4.87E-01 | 0.71  | 5.34E-02 | 1.07  | 2.20E-03 |
| HJURP     | -0.88 | 3.57E-01 | -1.14 | 5.06E-02 | 0.31  | 7.62E-01 | -0.26 | 8.32E-01 | 1.19  | 6.06E-02 | 1.44  | 1.46E-02 |
| HLA-DMA   | 0.13  | 8.46E-01 | -0.39 | 1.40E-01 | -0.93 | 9.22E-04 | -0.52 | 8.22E-02 | -1.06 | 1.86E-04 | -0.54 | 3.40E-02 |
| HLA-DMA   | 0.13  | 8.46E-01 | -0.39 | 1.40E-01 | -0.93 | 9.22E-04 | -0.52 | 8.22E-02 | -1.06 | 1.86E-04 | -0.54 | 3.40E-02 |
| HLA-DPB1  | -0.49 | 5.70E-01 | -0.65 | 1.73E-01 | -1.02 | 3.66E-02 | -0.16 | 8.77E-01 | -0.53 | 3.54E-01 | -0.37 | 5.47E-01 |
| HMGB2     | -0.57 | 4.30E-01 | -1.60 | 2.57E-04 | 0.45  | 4.20E-01 | -1.04 | 3.12E-02 | 1.02  | 2.28E-02 | 2.06  | 1.92E-05 |
| HMGCR     | 1.27  | 9.04E-02 | 1.41  | 7.44E-03 | 0.38  | 6.51E-01 | 0.14  | 9.17E-01 | -0.89 | 1.43E-01 | -1.03 | 6.32E-02 |

|         |       |          |       |          |       |          |       |          |       |          |       |          |
|---------|-------|----------|-------|----------|-------|----------|-------|----------|-------|----------|-------|----------|
| HMGCS1  | 1.67  | 5.38E-02 | 1.96  | 2.24E-03 | 0.63  | 4.75E-01 | 0.29  | 8.26E-01 | -1.04 | 1.56E-01 | -1.33 | 4.22E-02 |
| HMMR    | -1.54 | 2.26E-01 | -2.22 | 7.41E-03 | 0.45  | 7.55E-01 | -0.67 | 6.40E-01 | 2.00  | 2.64E-02 | 2.67  | 2.14E-03 |
| HMOX1   | -1.73 | 1.89E-02 | -2.21 | 2.12E-04 | 0.57  | 4.61E-01 | -0.48 | 6.10E-01 | 2.30  | 2.73E-04 | 2.78  | 1.84E-05 |
| HNMT    | 0.03  | 9.85E-01 | -0.44 | 1.87E-01 | -1.34 | 1.97E-04 | -0.46 | 2.57E-01 | -1.37 | 1.24E-04 | -0.90 | 4.68E-03 |
| HSD17B6 | 1.08  | 1.77E-01 | 0.86  | 1.32E-01 | -2.35 | 2.00E-04 | -0.22 | 8.54E-01 | -3.43 | 1.30E-06 | -3.21 | 2.27E-06 |
| HSPC159 | 0.66  | 2.02E-01 | 1.04  | 2.59E-03 | 0.41  | 3.63E-01 | 0.38  | 4.65E-01 | -0.25 | 6.40E-01 | -0.63 | 8.05E-02 |
| HTR2A   | 0.43  | 8.43E-01 | 2.58  | 1.73E-03 | -1.31 | 1.69E-01 | 2.14  | 2.21E-02 | -1.75 | 4.85E-02 | -3.89 | 2.91E-05 |
| ICAM1   | -0.16 | 9.21E-01 | -0.25 | 7.27E-01 | 0.82  | 1.32E-01 | -0.10 | 9.37E-01 | 0.98  | 5.96E-02 | 1.07  | 2.75E-02 |
| ID2     | -1.05 | 5.06E-04 | -1.51 | 1.14E-06 | 0.41  | 1.40E-01 | -0.47 | 1.08E-01 | 1.45  | 2.20E-06 | 1.92  | 2.41E-08 |
| ID3     | -1.57 | 9.01E-05 | -1.38 | 5.62E-05 | 0.07  | 9.21E-01 | 0.19  | 7.42E-01 | 1.64  | 1.22E-05 | 1.45  | 3.74E-05 |
| IDI1    | 0.94  | 7.07E-02 | 1.02  | 6.15E-03 | 0.43  | 3.90E-01 | 0.07  | 9.39E-01 | -0.52 | 2.56E-01 | -0.59 | 1.50E-01 |
| IER3    | 1.05  | 1.67E-02 | 1.04  | 1.96E-03 | 0.05  | 9.51E-01 | -0.01 | 9.96E-01 | -1.00 | 5.56E-03 | -0.99 | 3.92E-03 |
| IFI27   | -0.32 | 7.93E-01 | 1.30  | 8.84E-03 | -0.96 | 8.59E-02 | 1.62  | 5.58E-03 | -0.64 | 3.06E-01 | -2.26 | 5.79E-05 |
| IFI30   | -0.79 | 4.31E-01 | -1.20 | 3.83E-02 | -1.88 | 3.37E-03 | -0.41 | 6.94E-01 | -1.09 | 8.95E-02 | -0.68 | 3.32E-01 |
| IFI44   | 0.32  | 7.87E-01 | 2.45  | 1.66E-05 | 0.65  | 2.95E-01 | 2.13  | 5.79E-04 | 0.32  | 6.82E-01 | -1.80 | 6.09E-04 |
| IFI44L  | 0.24  | 9.25E-01 | 2.54  | 1.23E-03 | 0.58  | 6.30E-01 | 2.29  | 9.53E-03 | 0.34  | 8.11E-01 | -1.96 | 1.30E-02 |
| IFI6    | 0.49  | 3.37E-01 | 2.21  | 3.11E-07 | -0.24 | 6.28E-01 | 1.72  | 3.08E-05 | -0.73 | 3.24E-02 | -2.44 | 3.89E-08 |
| IFIH1   | 0.10  | 9.61E-01 | 1.65  | 4.65E-03 | -0.02 | 9.89E-01 | 1.54  | 2.19E-02 | -0.12 | 9.22E-01 | -1.67 | 5.55E-03 |
| IFIT1   | -0.04 | 9.93E-01 | 2.58  | 7.82E-03 | 0.28  | 8.96E-01 | 2.62  | 2.00E-02 | 0.32  | 8.67E-01 | -2.30 | 2.16E-02 |
| IFIT3   | 0.20  | 9.41E-01 | 1.94  | 1.03E-02 | 0.51  | 6.82E-01 | 1.74  | 5.20E-02 | 0.31  | 8.25E-01 | -1.43 | 7.31E-02 |
| IFITM1  | -0.50 | 7.03E-01 | 1.63  | 6.40E-03 | -0.93 | 1.95E-01 | 2.14  | 2.92E-03 | -0.43 | 6.51E-01 | -2.56 | 1.23E-04 |
| IGFBP6  | -0.17 | 7.36E-01 | -1.08 | 2.31E-05 | 0.21  | 5.02E-01 | -0.91 | 8.99E-04 | 0.38  | 1.30E-01 | 1.29  | 2.89E-06 |
| IGJ     | -0.09 | 9.64E-01 | -0.54 | 4.03E-01 | 1.22  | 3.87E-02 | -0.45 | 6.14E-01 | 1.30  | 2.41E-02 | 1.76  | 1.69E-03 |
| IGSF10  | -0.07 | 9.73E-01 | -0.10 | 9.23E-01 | 1.23  | 3.09E-02 | -0.03 | 9.87E-01 | 1.29  | 2.08E-02 | 1.32  | 1.27E-02 |
| IL1R1   | -0.19 | 9.15E-01 | -0.51 | 4.39E-01 | 1.04  | 8.28E-02 | -0.32 | 7.51E-01 | 1.22  | 3.40E-02 | 1.54  | 5.07E-03 |
| IL1RAP  | 0.61  | 3.00E-01 | 1.39  | 3.54E-04 | 0.57  | 2.01E-01 | 0.78  | 7.94E-02 | -0.05 | 9.56E-01 | -0.82 | 3.03E-02 |
| IL7R    | -2.08 | 8.20E-02 | -2.74 | 1.51E-03 | -2.08 | 2.62E-02 | -0.66 | 6.58E-01 | 0.00  | 9.99E-01 | 0.67  | 5.87E-01 |
| IL8     | 0.05  | 9.78E-01 | 0.30  | 6.66E-01 | 1.14  | 2.90E-02 | 0.25  | 7.97E-01 | 1.09  | 3.47E-02 | 0.85  | 9.53E-02 |
| INA     | 0.83  | 1.55E-01 | 0.88  | 2.88E-02 | -0.78 | 8.25E-02 | 0.04  | 9.71E-01 | -1.62 | 3.54E-04 | -1.66 | 1.69E-04 |
| INSIG2  | -0.10 | 9.01E-01 | 0.32  | 2.13E-01 | -1.72 | 2.29E-07 | 0.42  | 1.61E-01 | -1.62 | 4.41E-07 | -2.05 | 7.82E-09 |
| ITGA10  | -0.26 | 8.12E-01 | -0.48 | 3.37E-01 | 0.73  | 1.48E-01 | -0.22 | 7.99E-01 | 0.99  | 3.48E-02 | 1.22  | 6.68E-03 |
| ITGA2   | 0.31  | 7.67E-01 | 0.70  | 1.28E-01 | 2.02  | 9.65E-05 | 0.39  | 5.92E-01 | 1.71  | 4.76E-04 | 1.32  | 3.56E-03 |
| ITGA4   | 0.49  | 4.29E-01 | 0.46  | 2.46E-01 | -2.09 | 5.17E-06 | -0.03 | 9.78E-01 | -2.58 | 1.87E-07 | -2.55 | 1.38E-07 |
| ITGA6   | 0.17  | 8.67E-01 | -0.25 | 5.93E-01 | 1.27  | 1.25E-03 | -0.42 | 4.06E-01 | 1.10  | 3.63E-03 | 1.52  | 9.24E-05 |

|          |       |          |       |          |       |          |       |          |       |          |       |          |
|----------|-------|----------|-------|----------|-------|----------|-------|----------|-------|----------|-------|----------|
| ITGA8    | -1.86 | 5.42E-03 | -2.99 | 2.63E-06 | -3.06 | 3.72E-06 | -1.14 | 6.34E-02 | -1.20 | 3.13E-02 | -0.06 | 9.57E-01 |
| ITIH5    | 0.70  | 4.34E-01 | 1.33  | 9.73E-03 | -0.68 | 2.97E-01 | 0.63  | 4.07E-01 | -1.39 | 1.33E-02 | -2.02 | 3.32E-04 |
| JAG1     | 0.46  | 6.41E-01 | 0.80  | 1.14E-01 | -1.54 | 4.12E-03 | 0.34  | 7.05E-01 | -2.00 | 2.67E-04 | -2.34 | 2.68E-05 |
| JAM2     | 0.54  | 6.45E-01 | 0.26  | 7.85E-01 | -0.91 | 1.84E-01 | -0.29 | 8.07E-01 | -1.46 | 1.98E-02 | -1.17 | 5.17E-02 |
| KAL1     | 0.71  | 3.75E-01 | 2.17  | 5.39E-05 | -2.28 | 7.12E-05 | 1.46  | 9.30E-03 | -2.99 | 1.62E-06 | -4.45 | 3.04E-09 |
| KCNA1    | -0.06 | 9.63E-01 | -0.11 | 8.59E-01 | 1.27  | 1.02E-03 | -0.05 | 9.59E-01 | 1.32  | 5.26E-04 | 1.37  | 2.32E-04 |
| KCND2    | -0.50 | 5.61E-01 | -0.64 | 1.82E-01 | -1.17 | 1.74E-02 | -0.14 | 8.95E-01 | -0.66 | 2.13E-01 | -0.52 | 3.38E-01 |
| KCNE4    | -0.01 | 9.98E-01 | 0.44  | 3.30E-01 | -1.18 | 5.90E-03 | 0.45  | 4.41E-01 | -1.17 | 5.41E-03 | -1.62 | 1.57E-04 |
| KCNH1    | -0.91 | 2.40E-01 | -0.94 | 6.66E-02 | -2.22 | 1.61E-04 | -0.03 | 9.87E-01 | -1.31 | 1.59E-02 | -1.28 | 1.28E-02 |
| KCNJ2    | -0.34 | 6.45E-01 | -0.57 | 1.34E-01 | 1.20  | 2.62E-03 | -0.23 | 7.35E-01 | 1.54  | 1.75E-04 | 1.77  | 2.04E-05 |
| KCNMB1   | 0.63  | 3.91E-01 | 0.38  | 5.00E-01 | -1.12 | 1.94E-02 | -0.25 | 7.62E-01 | -1.76 | 3.80E-04 | -1.50 | 1.16E-03 |
| KGFLP1   | 0.17  | 8.53E-01 | -0.13 | 8.14E-01 | -1.03 | 4.80E-03 | -0.30 | 5.90E-01 | -1.20 | 1.04E-03 | -0.90 | 8.10E-03 |
| KGFLP1   | 0.17  | 8.53E-01 | -0.13 | 8.14E-01 | -1.03 | 4.80E-03 | -0.30 | 5.90E-01 | -1.20 | 1.04E-03 | -0.90 | 8.10E-03 |
| KGFLP1   | 0.17  | 8.53E-01 | -0.13 | 8.14E-01 | -1.03 | 4.80E-03 | -0.30 | 5.90E-01 | -1.20 | 1.04E-03 | -0.90 | 8.10E-03 |
| KGFLP1   | 0.19  | 7.60E-01 | -0.08 | 8.60E-01 | -0.91 | 1.92E-03 | -0.27 | 5.15E-01 | -1.10 | 2.29E-04 | -0.83 | 2.46E-03 |
| KHDRBS3  | 0.24  | 8.43E-01 | 0.10  | 9.04E-01 | -1.13 | 2.14E-02 | -0.14 | 8.95E-01 | -1.36 | 4.81E-03 | -1.22 | 7.76E-03 |
| KIAA0101 | -1.48 | 1.77E-01 | -2.04 | 5.88E-03 | -0.10 | 9.54E-01 | -0.56 | 6.74E-01 | 1.38  | 9.86E-02 | 1.94  | 1.13E-02 |
| KIAA1524 | -0.35 | 7.25E-01 | -0.45 | 3.96E-01 | 1.07  | 2.84E-02 | -0.10 | 9.30E-01 | 1.42  | 3.28E-03 | 1.52  | 1.15E-03 |
| KIF11    | -0.93 | 4.24E-01 | -1.24 | 6.89E-02 | 0.72  | 4.32E-01 | -0.32 | 8.19E-01 | 1.64  | 2.34E-02 | 1.96  | 4.73E-03 |
| KIF14    | -0.70 | 4.91E-01 | -0.89 | 1.32E-01 | 1.04  | 1.03E-01 | -0.18 | 8.89E-01 | 1.74  | 4.12E-03 | 1.92  | 1.11E-03 |
| KIF15    | -0.48 | 7.58E-01 | -0.61 | 4.70E-01 | 0.87  | 3.03E-01 | -0.12 | 9.45E-01 | 1.36  | 6.55E-02 | 1.48  | 3.18E-02 |
| KIF18A   | -0.93 | 4.34E-01 | -1.12 | 1.20E-01 | 0.48  | 6.61E-01 | -0.18 | 9.15E-01 | 1.41  | 6.02E-02 | 1.60  | 2.34E-02 |
| KIF20A   | -1.44 | 2.41E-01 | -2.55 | 1.60E-03 | 0.09  | 9.65E-01 | -1.11 | 3.09E-01 | 1.52  | 8.52E-02 | 2.63  | 1.57E-03 |
| KIF20B   | -0.52 | 6.89E-01 | -0.82 | 2.12E-01 | 0.98  | 1.69E-01 | -0.30 | 8.09E-01 | 1.50  | 2.15E-02 | 1.80  | 4.03E-03 |
| KIF4A    | -1.27 | 1.55E-01 | -1.53 | 1.17E-02 | 0.23  | 8.52E-01 | -0.26 | 8.44E-01 | 1.50  | 2.35E-02 | 1.76  | 5.40E-03 |
| KITLG    | -0.30 | 8.30E-01 | 0.20  | 8.27E-01 | 1.18  | 4.61E-02 | 0.50  | 5.75E-01 | 1.48  | 1.07E-02 | 0.98  | 8.15E-02 |
| KLF12    | -0.20 | 7.16E-01 | -0.38 | 1.34E-01 | -1.17 | 5.94E-05 | -0.19 | 6.63E-01 | -0.97 | 3.77E-04 | -0.79 | 1.95E-03 |
| KLHL13   | -0.81 | 2.12E-02 | -1.09 | 1.44E-04 | -1.31 | 4.11E-05 | -0.28 | 5.07E-01 | -0.51 | 8.66E-02 | -0.23 | 5.29E-01 |
| KLHL24   | -0.58 | 4.55E-01 | -1.09 | 1.26E-02 | -1.01 | 3.84E-02 | -0.51 | 4.38E-01 | -0.42 | 4.96E-01 | 0.09  | 9.27E-01 |
| KNTC1    | -0.27 | 8.18E-01 | -0.29 | 6.59E-01 | 0.79  | 1.42E-01 | -0.02 | 9.88E-01 | 1.06  | 3.44E-02 | 1.09  | 2.28E-02 |
| KRT14    | 0.90  | 4.67E-01 | 2.87  | 1.31E-04 | 0.47  | 6.74E-01 | 1.97  | 1.39E-02 | -0.43 | 7.09E-01 | -2.40 | 1.08E-03 |
| KRT16    | 1.20  | 2.75E-01 | 2.52  | 4.75E-04 | -0.29 | 8.24E-01 | 1.32  | 1.20E-01 | -1.49 | 4.85E-02 | -2.81 | 2.09E-04 |
| KRT16P3  | 0.55  | 3.32E-01 | 1.29  | 4.23E-04 | 0.16  | 8.02E-01 | 0.74  | 7.96E-02 | -0.39 | 4.06E-01 | -1.12 | 2.15E-03 |
| KRT17    | 0.30  | 6.86E-01 | 1.06  | 2.43E-03 | -0.04 | 9.62E-01 | 0.76  | 6.68E-02 | -0.34 | 4.79E-01 | -1.10 | 2.33E-03 |

|           |       |          |       |          |       |          |       |          |       |          |       |          |
|-----------|-------|----------|-------|----------|-------|----------|-------|----------|-------|----------|-------|----------|
| KRT18     | -0.08 | 9.64E-01 | 0.75  | 1.43E-01 | -0.56 | 3.88E-01 | 0.83  | 1.77E-01 | -0.48 | 4.75E-01 | -1.31 | 8.72E-03 |
| KRTAP1-1  | -0.96 | 1.73E-01 | -1.42 | 3.11E-03 | -1.65 | 2.03E-03 | -0.46 | 5.58E-01 | -0.69 | 2.31E-01 | -0.23 | 7.76E-01 |
| KRTAP1-1  | -0.65 | 1.56E-01 | -0.73 | 1.95E-02 | -1.11 | 1.58E-03 | -0.08 | 9.19E-01 | -0.46 | 2.16E-01 | -0.38 | 3.10E-01 |
| KRTAP1-1  | -0.65 | 1.56E-01 | -0.73 | 1.95E-02 | -1.11 | 1.58E-03 | -0.08 | 9.19E-01 | -0.46 | 2.16E-01 | -0.38 | 3.10E-01 |
| KRTAP1-5  | -1.05 | 3.12E-01 | -1.58 | 1.50E-02 | -2.02 | 5.01E-03 | -0.52 | 6.41E-01 | -0.97 | 2.10E-01 | -0.45 | 6.51E-01 |
| KRTAP1-5  | -1.05 | 3.12E-01 | -1.58 | 1.50E-02 | -2.02 | 5.01E-03 | -0.52 | 6.41E-01 | -0.97 | 2.10E-01 | -0.45 | 6.51E-01 |
| LAMA1     | -0.56 | 4.31E-01 | -0.32 | 5.54E-01 | 1.19  | 8.21E-03 | 0.24  | 7.60E-01 | 1.74  | 1.86E-04 | 1.51  | 5.78E-04 |
| LAMA2     | 0.57  | 5.81E-01 | 0.88  | 1.11E-01 | 1.50  | 9.44E-03 | 0.31  | 7.62E-01 | 0.93  | 1.20E-01 | 0.62  | 3.32E-01 |
| LAMC2     | 0.02  | 9.95E-01 | -0.03 | 9.83E-01 | 2.87  | 2.63E-04 | -0.05 | 9.81E-01 | 2.85  | 2.29E-04 | 2.90  | 1.19E-04 |
| LAPTM5    | -0.81 | 5.78E-01 | -1.56 | 3.87E-02 | 0.18  | 9.13E-01 | -0.74 | 5.39E-01 | 1.00  | 2.81E-01 | 1.74  | 2.37E-02 |
| LBH       | -0.75 | 1.52E-01 | -0.65 | 7.63E-02 | -1.08 | 6.33E-03 | 0.10  | 9.09E-01 | -0.33 | 5.28E-01 | -0.43 | 3.29E-01 |
| LEPR      | 0.03  | 9.85E-01 | -0.40 | 2.70E-01 | -1.53 | 6.61E-05 | -0.42 | 3.49E-01 | -1.56 | 4.29E-05 | -1.13 | 8.60E-04 |
| LEPREL1   | -0.39 | 7.33E-01 | -0.99 | 4.81E-02 | 1.18  | 3.00E-02 | -0.60 | 4.05E-01 | 1.57  | 3.57E-03 | 2.17  | 8.90E-05 |
| LGALS3BP  | 0.00  | 9.98E-01 | 0.73  | 5.78E-03 | -1.40 | 2.22E-05 | 0.74  | 1.67E-02 | -1.40 | 1.53E-05 | -2.14 | 2.73E-08 |
| LGI2      | 0.07  | 9.68E-01 | -0.03 | 9.72E-01 | 1.68  | 1.33E-03 | -0.10 | 9.32E-01 | 1.61  | 1.63E-03 | 1.72  | 5.78E-04 |
| LGR4      | 0.94  | 9.54E-03 | 1.63  | 2.53E-06 | 0.80  | 8.19E-03 | 0.69  | 3.20E-02 | -0.14 | 7.72E-01 | -0.83 | 3.86E-03 |
| LHFPL2    | -0.22 | 8.73E-01 | 0.27  | 6.96E-01 | 1.10  | 3.39E-02 | 0.49  | 5.08E-01 | 1.32  | 9.94E-03 | 0.83  | 1.00E-01 |
| LIMCH1    | 0.13  | 9.26E-01 | 0.39  | 4.81E-01 | -0.97 | 4.25E-02 | 0.25  | 7.62E-01 | -1.11 | 1.86E-02 | -1.36 | 2.63E-03 |
| LMNB1     | -1.12 | 2.40E-01 | -1.20 | 5.50E-02 | 0.72  | 3.84E-01 | -0.08 | 9.65E-01 | 1.84  | 6.08E-03 | 1.91  | 2.88E-03 |
| LMOD1     | 0.27  | 8.26E-01 | -0.36 | 5.65E-01 | -2.45 | 2.04E-05 | -0.62 | 3.39E-01 | -2.71 | 3.65E-06 | -2.09 | 6.10E-05 |
| LOC401097 | 0.79  | 6.73E-01 | 1.03  | 3.08E-01 | -0.81 | 5.30E-01 | 0.24  | 9.13E-01 | -1.60 | 1.10E-01 | -1.84 | 4.49E-02 |
| LOC402778 | 0.15  | 9.38E-01 | -0.03 | 9.79E-01 | -1.27 | 4.42E-02 | -0.19 | 8.90E-01 | -1.42 | 2.12E-02 | -1.24 | 3.57E-02 |
| LOC554202 | -0.10 | 9.36E-01 | -0.28 | 5.57E-01 | 1.16  | 3.58E-03 | -0.18 | 8.03E-01 | 1.26  | 1.44E-03 | 1.44  | 2.34E-04 |
| LOH3CR2A  | -0.42 | 7.84E-01 | 0.05  | 9.68E-01 | -1.33 | 5.62E-02 | 0.47  | 6.69E-01 | -0.91 | 2.27E-01 | -1.38 | 3.24E-02 |
| LOXL3     | -0.33 | 7.28E-01 | 0.81  | 5.50E-02 | 0.39  | 5.17E-01 | 1.14  | 1.83E-02 | 0.72  | 1.32E-01 | -0.42 | 4.34E-01 |
| LPAR1     | 0.02  | 9.78E-01 | -0.33 | 9.49E-02 | 0.76  | 5.19E-04 | -0.35 | 1.40E-01 | 0.74  | 5.37E-04 | 1.09  | 3.64E-06 |
| LPPR4     | 1.11  | 2.75E-01 | 1.87  | 3.70E-03 | -0.80 | 3.32E-01 | 0.76  | 4.21E-01 | -1.91 | 5.99E-03 | -2.68 | 1.57E-04 |
| LPXN      | -0.24 | 7.59E-01 | 0.18  | 7.30E-01 | 1.19  | 1.46E-03 | 0.41  | 3.90E-01 | 1.43  | 1.77E-04 | 1.02  | 3.28E-03 |
| LRCH2     | 0.41  | 6.53E-01 | 0.08  | 9.24E-01 | 1.09  | 2.38E-02 | -0.33 | 6.71E-01 | 0.68  | 1.88E-01 | 1.01  | 2.56E-02 |
| LRR32     | -0.50 | 2.83E-01 | 0.50  | 1.02E-01 | -1.33 | 1.18E-04 | 1.00  | 3.66E-03 | -0.83 | 8.84E-03 | -1.83 | 1.06E-06 |
| LRR49     | 0.37  | 7.23E-01 | -0.29 | 6.66E-01 | 1.17  | 2.20E-02 | -0.66 | 2.96E-01 | 0.80  | 1.34E-01 | 1.46  | 2.60E-03 |
| LRRCC1    | 0.18  | 8.27E-01 | -0.07 | 9.09E-01 | 1.06  | 2.67E-03 | -0.25 | 6.57E-01 | 0.88  | 1.03E-02 | 1.13  | 8.01E-04 |
| LRRFIP1   | -0.16 | 9.20E-01 | 0.97  | 4.08E-02 | 0.98  | 6.33E-02 | 1.13  | 4.13E-02 | 1.14  | 2.64E-02 | 0.01  | 9.96E-01 |
| LRRFIP1   | 0.18  | 9.30E-01 | 1.61  | 6.44E-03 | 1.26  | 5.61E-02 | 1.44  | 3.83E-02 | 1.09  | 1.05E-01 | -0.35 | 7.12E-01 |

|         |       |          |       |          |       |          |       |          |       |          |       |          |
|---------|-------|----------|-------|----------|-------|----------|-------|----------|-------|----------|-------|----------|
| LRRFIP1 | 0.16  | 9.41E-01 | 1.39  | 2.98E-02 | 1.27  | 7.50E-02 | 1.22  | 1.19E-01 | 1.11  | 1.28E-01 | -0.12 | 9.32E-01 |
| LRRN3   | 0.20  | 9.13E-01 | 1.57  | 5.85E-03 | -0.02 | 9.89E-01 | 1.36  | 4.17E-02 | -0.23 | 8.33E-01 | -1.59 | 7.09E-03 |
| LSAMP   | 0.44  | 5.18E-01 | -0.37 | 3.90E-01 | -1.74 | 6.27E-05 | -0.81 | 6.04E-02 | -2.18 | 2.84E-06 | -1.37 | 4.61E-04 |
| LY6E    | 0.11  | 9.31E-01 | 1.28  | 8.51E-04 | -0.26 | 6.71E-01 | 1.17  | 7.24E-03 | -0.37 | 4.85E-01 | -1.54 | 1.84E-04 |
| LY75    | 0.03  | 9.85E-01 | -0.09 | 9.08E-01 | 1.00  | 2.45E-02 | -0.12 | 9.02E-01 | 0.96  | 2.77E-02 | 1.08  | 9.24E-03 |
| LYN     | -0.35 | 7.50E-01 | -0.01 | 9.91E-01 | -1.17 | 2.34E-02 | 0.34  | 6.92E-01 | -0.82 | 1.24E-01 | -1.16 | 1.66E-02 |
| LYPD6B  | -0.23 | 8.52E-01 | -0.92 | 4.19E-02 | -1.82 | 4.04E-04 | -0.68 | 2.48E-01 | -1.59 | 1.30E-03 | -0.90 | 5.17E-02 |
| MAFB    | -0.32 | 8.64E-01 | -0.42 | 6.55E-01 | 1.32  | 7.33E-02 | -0.10 | 9.59E-01 | 1.64  | 2.12E-02 | 1.74  | 1.02E-02 |
| MAGI1   | -0.67 | 5.38E-02 | -0.87 | 9.03E-04 | -1.20 | 8.07E-05 | -0.20 | 6.64E-01 | -0.52 | 6.21E-02 | -0.33 | 2.74E-01 |
| MALL    | -0.45 | 7.20E-01 | -1.08 | 5.42E-02 | 1.32  | 3.10E-02 | -0.64 | 4.45E-01 | 1.76  | 3.48E-03 | 2.40  | 1.05E-04 |
| MAP3K5  | -0.36 | 5.70E-01 | -0.90 | 5.25E-03 | 0.19  | 7.31E-01 | -0.54 | 1.90E-01 | 0.55  | 1.39E-01 | 1.09  | 1.36E-03 |
| MAPK10  | 0.44  | 6.12E-01 | 0.13  | 8.67E-01 | -0.65 | 2.12E-01 | -0.31 | 6.88E-01 | -1.10 | 1.95E-02 | -0.78 | 8.81E-02 |
| MAT2A   | -0.01 | 9.93E-01 | -0.66 | 9.57E-03 | 0.37  | 2.34E-01 | -0.65 | 2.90E-02 | 0.38  | 2.08E-01 | 1.03  | 2.32E-04 |
| MBOAT1  | -0.18 | 8.91E-01 | -0.17 | 7.99E-01 | 1.35  | 3.13E-03 | 0.00  | 9.97E-01 | 1.53  | 8.26E-04 | 1.53  | 5.43E-04 |
| MBOAT2  | -0.05 | 9.58E-01 | -0.75 | 4.10E-03 | 0.78  | 6.76E-03 | -0.70 | 2.05E-02 | 0.83  | 3.47E-03 | 1.53  | 2.63E-06 |
| MCM4    | -0.29 | 7.59E-01 | -0.09 | 9.02E-01 | 0.83  | 6.06E-02 | 0.20  | 8.09E-01 | 1.12  | 9.76E-03 | 0.92  | 2.43E-02 |
| MCM7    | -0.86 | 2.96E-01 | -0.91 | 8.57E-02 | 0.44  | 5.60E-01 | -0.05 | 9.71E-01 | 1.30  | 1.97E-02 | 1.36  | 1.04E-02 |
| MCM8    | -0.36 | 7.84E-01 | -0.06 | 9.55E-01 | 0.80  | 2.19E-01 | 0.30  | 7.74E-01 | 1.16  | 4.80E-02 | 0.86  | 1.43E-01 |
| MEOX2   | 0.97  | 4.17E-01 | 0.54  | 5.63E-01 | 3.51  | 3.30E-05 | -0.44 | 7.39E-01 | 2.54  | 9.87E-04 | 2.98  | 1.16E-04 |
| MEST    | -0.02 | 9.92E-01 | 0.06  | 9.38E-01 | -1.23 | 3.61E-03 | 0.08  | 9.38E-01 | -1.21 | 3.43E-03 | -1.28 | 1.30E-03 |
| MFAP4   | 1.25  | 1.46E-01 | 2.08  | 6.28E-04 | 0.86  | 2.30E-01 | 0.83  | 3.03E-01 | -0.39 | 6.78E-01 | -1.22 | 4.48E-02 |
| MIR622  | -0.21 | 8.88E-01 | 0.49  | 3.93E-01 | -0.90 | 9.80E-02 | 0.70  | 2.79E-01 | -0.69 | 2.32E-01 | -1.39 | 5.14E-03 |
| MKI67   | -1.80 | 1.29E-01 | -2.55 | 2.05E-03 | 0.49  | 7.22E-01 | -0.75 | 5.79E-01 | 2.29  | 9.78E-03 | 3.04  | 5.19E-04 |
| MKX     | 0.32  | 7.63E-01 | 0.09  | 9.14E-01 | 2.00  | 1.35E-04 | -0.23 | 7.99E-01 | 1.68  | 6.86E-04 | 1.91  | 1.12E-04 |
| MME     | -0.99 | 6.46E-01 | 0.02  | 9.92E-01 | 2.45  | 3.53E-02 | 1.02  | 5.58E-01 | 3.44  | 2.81E-03 | 2.43  | 2.57E-02 |
| MMP19   | 0.31  | 3.32E-01 | 0.46  | 2.03E-02 | -1.33 | 6.40E-07 | 0.15  | 6.81E-01 | -1.64 | 1.85E-08 | -1.79 | 3.80E-09 |
| MMP3    | -0.04 | 9.87E-01 | -0.21 | 8.48E-01 | 1.34  | 5.81E-02 | -0.17 | 9.14E-01 | 1.38  | 4.65E-02 | 1.55  | 1.75E-02 |
| MND1    | -0.76 | 3.73E-01 | -0.46 | 4.74E-01 | 0.65  | 3.24E-01 | 0.30  | 7.59E-01 | 1.41  | 1.11E-02 | 1.11  | 3.59E-02 |
| MOXD1   | 0.02  | 9.96E-01 | -0.04 | 9.68E-01 | 3.07  | 5.04E-06 | -0.06 | 9.70E-01 | 3.06  | 4.22E-06 | 3.12  | 2.38E-06 |
| MPP7    | 0.37  | 6.69E-01 | 0.23  | 7.08E-01 | 1.19  | 7.87E-03 | -0.14 | 8.83E-01 | 0.82  | 6.60E-02 | 0.96  | 2.12E-02 |
| MRVI1   | 0.23  | 7.46E-01 | -0.15 | 7.63E-01 | -0.78 | 2.09E-02 | -0.38 | 4.01E-01 | -1.00 | 2.64E-03 | -0.63 | 4.73E-02 |
| MSC     | 0.05  | 9.82E-01 | 1.10  | 4.35E-02 | -0.61 | 4.03E-01 | 1.05  | 1.14E-01 | -0.66 | 3.42E-01 | -1.70 | 2.49E-03 |
| MSX2    | 0.08  | 9.70E-01 | 0.79  | 2.21E-01 | -0.59 | 4.74E-01 | 0.71  | 4.12E-01 | -0.67 | 3.87E-01 | -1.38 | 2.28E-02 |
| MT1E    | -0.57 | 2.85E-02 | -0.92 | 3.48E-05 | 0.08  | 8.34E-01 | -0.35 | 1.61E-01 | 0.65  | 2.40E-03 | 1.00  | 1.45E-05 |

|            |       |          |       |          |       |          |       |          |       |          |       |          |
|------------|-------|----------|-------|----------|-------|----------|-------|----------|-------|----------|-------|----------|
| MT1X       | -1.00 | 3.63E-02 | -0.65 | 7.27E-02 | 0.60  | 1.49E-01 | 0.35  | 5.50E-01 | 1.60  | 1.06E-04 | 1.25  | 8.99E-04 |
| MT2A       | -1.34 | 2.05E-05 | -0.75 | 1.35E-03 | 0.34  | 2.27E-01 | 0.59  | 2.54E-02 | 1.67  | 1.38E-07 | 1.08  | 3.42E-05 |
| MT2A       | -1.34 | 2.05E-05 | -0.79 | 8.36E-04 | 0.37  | 1.81E-01 | 0.55  | 4.21E-02 | 1.71  | 1.38E-07 | 1.16  | 1.71E-05 |
| MT2A       | -1.27 | 2.13E-05 | -0.74 | 1.34E-03 | 0.40  | 1.31E-01 | 0.53  | 4.80E-02 | 1.67  | 1.38E-07 | 1.14  | 1.72E-05 |
| MTSS1      | -1.22 | 1.11E-01 | -1.99 | 4.00E-04 | -0.32 | 7.30E-01 | -0.77 | 2.94E-01 | 0.91  | 1.41E-01 | 1.67  | 2.74E-03 |
| MURC       | 0.04  | 9.79E-01 | 1.01  | 5.96E-03 | 0.12  | 8.70E-01 | 0.97  | 2.27E-02 | 0.08  | 9.15E-01 | -0.88 | 1.95E-02 |
| MX1        | 0.18  | 9.58E-01 | 3.35  | 5.01E-04 | 0.22  | 9.19E-01 | 3.17  | 3.50E-03 | 0.04  | 9.88E-01 | -3.14 | 1.29E-03 |
| MX2        | 0.28  | 9.20E-01 | 2.40  | 3.94E-03 | -0.55 | 6.81E-01 | 2.12  | 2.75E-02 | -0.83 | 4.71E-01 | -2.95 | 8.19E-04 |
| MXRA5      | 1.18  | 5.06E-01 | 2.23  | 2.03E-02 | 1.88  | 8.40E-02 | 1.05  | 4.83E-01 | 0.69  | 6.46E-01 | -0.36 | 8.38E-01 |
| MYEF2      | -0.05 | 9.75E-01 | -0.70 | 6.36E-02 | 0.31  | 5.70E-01 | -0.65 | 1.59E-01 | 0.36  | 4.91E-01 | 1.01  | 8.11E-03 |
| MYH10      | 0.02  | 9.86E-01 | -0.38 | 1.84E-01 | 0.78  | 8.03E-03 | -0.40 | 2.58E-01 | 0.76  | 8.97E-03 | 1.17  | 9.84E-05 |
| MYH11      | 1.53  | 1.78E-01 | 2.36  | 2.39E-03 | -0.05 | 9.79E-01 | 0.83  | 4.84E-01 | -1.58 | 6.22E-02 | -2.41 | 2.61E-03 |
| MYL9       | -0.01 | 9.92E-01 | -0.15 | 7.19E-01 | -1.76 | 1.15E-06 | -0.13 | 8.12E-01 | -1.74 | 1.18E-06 | -1.61 | 2.38E-06 |
| MYPN       | -0.81 | 5.48E-01 | -1.41 | 4.67E-02 | -0.72 | 4.59E-01 | -0.60 | 6.12E-01 | 0.09  | 9.55E-01 | 0.69  | 4.53E-01 |
| N4BP2      | -0.01 | 9.94E-01 | -0.13 | 8.33E-01 | 0.93  | 1.57E-02 | -0.11 | 8.93E-01 | 0.94  | 1.30E-02 | 1.06  | 3.81E-03 |
| NALCN      | -0.07 | 9.61E-01 | -0.32 | 5.70E-01 | -1.22 | 7.91E-03 | -0.24 | 7.63E-01 | -1.14 | 1.13E-02 | -0.90 | 3.60E-02 |
| NAMPT      | -0.35 | 6.37E-01 | -0.36 | 4.21E-01 | 0.93  | 1.90E-02 | 0.00  | 9.97E-01 | 1.29  | 1.34E-03 | 1.29  | 8.30E-04 |
| NAMPT      | -0.26 | 7.44E-01 | -0.31 | 4.79E-01 | 0.94  | 1.36E-02 | -0.05 | 9.62E-01 | 1.21  | 1.67E-03 | 1.26  | 7.49E-04 |
| NAP1L3     | 0.61  | 2.41E-01 | 1.01  | 2.79E-03 | -0.19 | 7.43E-01 | 0.40  | 4.14E-01 | -0.80 | 2.82E-02 | -1.20 | 7.81E-04 |
| NASP       | -0.36 | 6.02E-01 | -0.13 | 8.24E-01 | 0.77  | 4.74E-02 | 0.23  | 7.19E-01 | 1.13  | 3.00E-03 | 0.90  | 1.23E-02 |
| NAV2       | -1.14 | 1.22E-02 | -1.30 | 3.89E-04 | 0.80  | 3.92E-02 | -0.16 | 8.29E-01 | 1.94  | 7.02E-06 | 2.10  | 1.90E-06 |
| NCALD      | 0.07  | 9.24E-01 | 0.10  | 7.92E-01 | 1.40  | 2.72E-06 | 0.03  | 9.70E-01 | 1.33  | 4.19E-06 | 1.30  | 3.65E-06 |
| NCAM1      | 0.44  | 7.79E-01 | -0.14 | 9.08E-01 | 1.47  | 3.93E-02 | -0.58 | 5.92E-01 | 1.03  | 1.71E-01 | 1.61  | 1.56E-02 |
| NCAM2      | -0.20 | 9.08E-01 | 0.41  | 5.48E-01 | -2.46 | 7.75E-05 | 0.61  | 4.32E-01 | -2.26 | 1.65E-04 | -2.87 | 5.54E-06 |
| NCAPG      | -1.20 | 3.20E-01 | -2.12 | 4.89E-03 | 0.58  | 6.15E-01 | -0.92 | 4.06E-01 | 1.79  | 2.86E-02 | 2.70  | 7.64E-04 |
| NCAPG2     | -0.51 | 6.19E-01 | -0.66 | 2.33E-01 | 0.45  | 5.41E-01 | -0.15 | 8.98E-01 | 0.96  | 8.80E-02 | 1.11  | 3.22E-02 |
| NCAPH      | -0.63 | 6.85E-01 | -0.91 | 2.53E-01 | 0.77  | 4.31E-01 | -0.29 | 8.56E-01 | 1.40  | 8.00E-02 | 1.69  | 2.25E-02 |
| NCKAP5     | 0.61  | 4.70E-01 | 0.21  | 7.85E-01 | -0.66 | 2.52E-01 | -0.40 | 6.14E-01 | -1.27 | 1.24E-02 | -0.87 | 7.87E-02 |
| NCRNA00188 | -0.37 | 2.38E-01 | -1.10 | 5.06E-06 | -0.40 | 7.38E-02 | -0.73 | 2.38E-03 | -0.04 | 9.38E-01 | 0.70  | 1.05E-03 |
| NDC80      | -0.80 | 5.62E-01 | -1.35 | 6.08E-02 | 0.76  | 4.30E-01 | -0.55 | 6.57E-01 | 1.56  | 4.35E-02 | 2.11  | 4.03E-03 |
| NDRG1      | -0.39 | 5.76E-01 | -0.52 | 1.83E-01 | 0.60  | 1.54E-01 | -0.12 | 8.84E-01 | 0.99  | 1.10E-02 | 1.12  | 2.92E-03 |
| NDST1      | 0.32  | 4.65E-01 | 0.69  | 4.84E-03 | -0.41 | 1.45E-01 | 0.37  | 2.56E-01 | -0.73 | 5.71E-03 | -1.10 | 6.15E-05 |
| NEDD4L     | -0.09 | 9.71E-01 | -0.66 | 4.12E-01 | 0.74  | 4.08E-01 | -0.57 | 6.10E-01 | 0.84  | 3.25E-01 | 1.41  | 4.15E-02 |
| NEFM       | -2.23 | 3.53E-02 | -2.55 | 1.45E-03 | -2.44 | 5.04E-03 | -0.32 | 8.51E-01 | -0.22 | 8.94E-01 | 0.11  | 9.52E-01 |



|        |       |          |       |          |       |          |       |          |       |          |       |          |
|--------|-------|----------|-------|----------|-------|----------|-------|----------|-------|----------|-------|----------|
| NEIL3  | -0.36 | 7.48E-01 | -0.86 | 9.06E-02 | 0.47  | 4.92E-01 | -0.49 | 5.31E-01 | 0.84  | 1.35E-01 | 1.33  | 8.38E-03 |
| NEK10  | -0.93 | 2.96E-01 | -1.68 | 2.84E-03 | -0.43 | 6.22E-01 | -0.75 | 3.40E-01 | 0.50  | 5.31E-01 | 1.25  | 2.96E-02 |
| NEK2   | -0.91 | 3.12E-01 | -1.21 | 3.29E-02 | 0.27  | 8.01E-01 | -0.30 | 7.95E-01 | 1.18  | 5.71E-02 | 1.47  | 1.11E-02 |
| NEK6   | -0.31 | 2.90E-01 | -0.23 | 2.84E-01 | -1.09 | 4.72E-06 | 0.09  | 8.22E-01 | -0.78 | 2.43E-04 | -0.86 | 4.38E-05 |
| NEK7   | 0.27  | 8.01E-01 | 0.34  | 5.60E-01 | -0.71 | 1.65E-01 | 0.06  | 9.59E-01 | -0.98 | 3.74E-02 | -1.04 | 1.93E-02 |
| NFATC2 | 1.00  | 3.03E-01 | 1.55  | 1.08E-02 | 0.76  | 3.35E-01 | 0.54  | 5.92E-01 | -0.24 | 8.33E-01 | -0.78 | 2.75E-01 |
| NFIA   | 0.42  | 6.23E-01 | 0.34  | 5.43E-01 | 1.20  | 9.44E-03 | -0.09 | 9.37E-01 | 0.78  | 1.01E-01 | 0.87  | 4.86E-02 |
| NFIB   | 0.61  | 6.28E-01 | 0.77  | 2.67E-01 | 2.81  | 1.20E-04 | 0.16  | 9.20E-01 | 2.20  | 1.30E-03 | 2.05  | 1.65E-03 |
| NFKBIA | -0.35 | 6.09E-01 | -0.33 | 4.28E-01 | 1.09  | 3.62E-03 | 0.02  | 9.86E-01 | 1.44  | 1.93E-04 | 1.42  | 1.42E-04 |
| NHSL1  | 0.09  | 9.54E-01 | 0.20  | 7.54E-01 | 1.50  | 1.41E-03 | 0.11  | 9.12E-01 | 1.41  | 2.07E-03 | 1.30  | 2.84E-03 |
| NLGN1  | 0.25  | 8.82E-01 | -0.38 | 6.19E-01 | 2.38  | 2.28E-04 | -0.63 | 4.46E-01 | 2.13  | 5.71E-04 | 2.77  | 1.83E-05 |
| NLRP10 | 0.19  | 8.37E-01 | 0.91  | 8.69E-03 | -0.21 | 7.17E-01 | 0.72  | 8.64E-02 | -0.40 | 3.77E-01 | -1.12 | 2.09E-03 |
| NME5   | 0.28  | 6.38E-01 | -0.07 | 9.02E-01 | -1.07 | 1.09E-03 | -0.35 | 4.17E-01 | -1.35 | 6.99E-05 | -1.01 | 1.04E-03 |
| NMI    | 0.25  | 7.84E-01 | 1.18  | 1.74E-03 | 0.77  | 6.13E-02 | 0.93  | 3.10E-02 | 0.52  | 2.44E-01 | -0.41 | 3.83E-01 |
| NMT2   | -0.37 | 4.95E-01 | -1.08 | 4.97E-04 | -0.38 | 3.22E-01 | -0.71 | 4.21E-02 | -0.01 | 9.94E-01 | 0.70  | 2.20E-02 |
| NPC1   | -0.89 | 2.32E-01 | -0.84 | 9.18E-02 | 0.18  | 8.52E-01 | 0.05  | 9.73E-01 | 1.07  | 4.22E-02 | 1.02  | 4.08E-02 |
| NR2F2  | 0.16  | 8.18E-01 | 0.14  | 7.31E-01 | -1.17 | 1.58E-04 | -0.02 | 9.84E-01 | -1.33 | 2.56E-05 | -1.31 | 1.96E-05 |
| NR3C2  | 0.20  | 7.65E-01 | 0.48  | 1.12E-01 | 1.22  | 2.53E-04 | 0.27  | 5.67E-01 | 1.02  | 1.35E-03 | 0.74  | 1.17E-02 |
| NR4A1  | 0.22  | 7.02E-01 | -0.19 | 5.87E-01 | 0.98  | 7.81E-04 | -0.41 | 2.28E-01 | 0.77  | 6.19E-03 | 1.17  | 5.68E-05 |
| NR4A2  | -0.37 | 8.11E-01 | -0.28 | 7.73E-01 | 1.87  | 5.42E-03 | 0.09  | 9.59E-01 | 2.23  | 9.32E-04 | 2.15  | 8.70E-04 |
| NR4A3  | -0.19 | 8.64E-01 | -0.14 | 8.27E-01 | 1.17  | 5.75E-03 | 0.05  | 9.67E-01 | 1.35  | 1.35E-03 | 1.31  | 1.19E-03 |
| NRP2   | -0.30 | 8.12E-01 | -0.81 | 1.17E-01 | 1.11  | 4.28E-02 | -0.51 | 5.12E-01 | 1.41  | 8.94E-03 | 1.92  | 3.41E-04 |
| NTRK2  | 0.58  | 4.62E-01 | 1.00  | 2.30E-02 | -0.87 | 7.79E-02 | 0.42  | 5.59E-01 | -1.45 | 2.64E-03 | -1.87 | 1.29E-04 |
| NTRK3  | 0.60  | 3.04E-01 | 1.31  | 6.01E-04 | -0.38 | 4.55E-01 | 0.71  | 1.19E-01 | -0.98 | 1.36E-02 | -1.69 | 5.20E-05 |
| NUAK1  | -0.02 | 9.95E-01 | 0.17  | 8.52E-01 | -1.74 | 2.29E-03 | 0.19  | 8.73E-01 | -1.72 | 2.12E-03 | -1.91 | 5.16E-04 |
| NUF2   | -1.30 | 3.57E-01 | -1.64 | 5.96E-02 | 0.81  | 5.08E-01 | -0.33 | 8.61E-01 | 2.11  | 2.26E-02 | 2.45  | 5.72E-03 |
| NUSAP1 | -1.02 | 3.00E-01 | -1.73 | 5.11E-03 | 0.72  | 3.79E-01 | -0.70 | 4.50E-01 | 1.75  | 9.40E-03 | 2.45  | 2.76E-04 |
| OAS1   | 0.39  | 8.69E-01 | 2.99  | 4.91E-04 | 1.68  | 6.76E-02 | 2.60  | 7.05E-03 | 1.29  | 1.82E-01 | -1.31 | 1.48E-01 |
| OAS2   | 0.50  | 6.06E-01 | 2.57  | 8.22E-06 | -0.35 | 6.42E-01 | 2.07  | 5.90E-04 | -0.86 | 1.20E-01 | -2.92 | 1.78E-06 |
| OAS3   | 0.12  | 9.35E-01 | 1.70  | 2.22E-04 | 0.23  | 7.60E-01 | 1.58  | 2.28E-03 | 0.11  | 9.01E-01 | -1.47 | 1.22E-03 |
| ODZ3   | -0.17 | 9.32E-01 | 0.77  | 2.41E-01 | 1.65  | 1.14E-02 | 0.94  | 2.22E-01 | 1.82  | 4.81E-03 | 0.88  | 1.89E-01 |
| OGFRL1 | -0.25 | 5.82E-01 | -0.24 | 3.89E-01 | 1.17  | 2.93E-05 | 0.01  | 9.87E-01 | 1.42  | 1.82E-06 | 1.41  | 1.35E-06 |
| OGN    | 1.56  | 4.92E-01 | 1.36  | 3.47E-01 | 3.57  | 8.85E-03 | -0.20 | 9.56E-01 | 2.01  | 1.64E-01 | 2.21  | 9.50E-02 |
| OLFM2  | 0.54  | 2.30E-01 | 1.70  | 2.63E-06 | -0.23 | 6.01E-01 | 1.16  | 1.17E-03 | -0.77 | 1.46E-02 | -1.94 | 4.26E-07 |

|          |       |          |       |          |       |          |       |          |       |          |       |          |
|----------|-------|----------|-------|----------|-------|----------|-------|----------|-------|----------|-------|----------|
| OSTN     | 0.30  | 8.08E-01 | 1.20  | 1.28E-02 | -0.07 | 9.54E-01 | 0.90  | 1.33E-01 | -0.37 | 6.25E-01 | -1.27 | 1.10E-02 |
| OXTR     | 0.54  | 5.63E-01 | 0.80  | 1.14E-01 | -0.41 | 5.68E-01 | 0.26  | 7.89E-01 | -0.95 | 7.55E-02 | -1.21 | 1.50E-02 |
| P4HA2    | -0.38 | 4.19E-01 | 0.48  | 9.18E-02 | -0.61 | 4.27E-02 | 0.86  | 7.24E-03 | -0.23 | 5.66E-01 | -1.09 | 2.62E-04 |
| PAICS    | -0.65 | 1.48E-01 | -0.25 | 5.36E-01 | 0.55  | 1.18E-01 | 0.40  | 3.54E-01 | 1.20  | 4.94E-04 | 0.80  | 1.13E-02 |
| PALMD    | 1.04  | 3.45E-01 | 1.88  | 5.02E-03 | -1.02 | 2.07E-01 | 0.84  | 3.87E-01 | -2.06 | 4.71E-03 | -2.90 | 1.05E-04 |
| PAMR1    | 0.17  | 8.75E-01 | -1.40 | 2.98E-04 | 0.37  | 4.74E-01 | -1.57 | 5.90E-04 | 0.20  | 7.57E-01 | 1.77  | 2.75E-05 |
| PAPPA    | 0.00  | 9.99E-01 | 0.63  | 5.58E-02 | -1.51 | 9.37E-05 | 0.63  | 1.13E-01 | -1.51 | 7.36E-05 | -2.14 | 4.77E-07 |
| PAPPA    | -0.07 | 9.50E-01 | 0.43  | 1.64E-01 | -1.34 | 8.85E-05 | 0.49  | 1.74E-01 | -1.27 | 1.27E-04 | -1.76 | 1.30E-06 |
| PAPPA2   | -0.42 | 7.21E-01 | -0.20 | 8.21E-01 | 0.80  | 2.06E-01 | 0.22  | 8.45E-01 | 1.23  | 3.22E-02 | 1.00  | 7.08E-02 |
| PAPSS1   | 0.31  | 3.22E-01 | 0.29  | 1.64E-01 | -0.83 | 2.95E-04 | -0.02 | 9.72E-01 | -1.14 | 4.25E-06 | -1.12 | 3.80E-06 |
| PARP14   | 0.27  | 7.74E-01 | 1.44  | 3.96E-04 | 0.43  | 4.18E-01 | 1.17  | 9.30E-03 | 0.16  | 8.25E-01 | -1.01 | 1.10E-02 |
| PARP8    | 0.32  | 5.36E-01 | 0.38  | 1.90E-01 | -2.64 | 1.52E-09 | 0.06  | 9.27E-01 | -2.96 | 2.32E-10 | -3.02 | 2.63E-10 |
| PARP9    | 0.41  | 6.21E-01 | 1.80  | 6.12E-05 | 0.51  | 3.26E-01 | 1.39  | 3.43E-03 | 0.10  | 9.03E-01 | -1.29 | 2.36E-03 |
| PART1    | -0.09 | 9.18E-01 | -0.03 | 9.50E-01 | 1.35  | 2.04E-05 | 0.06  | 9.33E-01 | 1.43  | 6.21E-06 | 1.38  | 6.95E-06 |
| PBK      | -1.42 | 4.27E-01 | -2.35 | 2.27E-02 | 0.67  | 6.95E-01 | -0.93 | 5.91E-01 | 2.09  | 6.67E-02 | 3.02  | 4.85E-03 |
| PCDH10   | -0.16 | 9.31E-01 | 0.36  | 6.35E-01 | -1.16 | 5.48E-02 | 0.52  | 5.59E-01 | -1.00 | 1.01E-01 | -1.52 | 6.64E-03 |
| PCOLCE2  | 0.56  | 6.08E-01 | 0.48  | 4.93E-01 | 1.41  | 1.89E-02 | -0.09 | 9.57E-01 | 0.84  | 1.90E-01 | 0.93  | 1.14E-01 |
| PCSK1    | -0.50 | 5.94E-01 | -0.70 | 1.69E-01 | 1.68  | 1.59E-03 | -0.20 | 8.50E-01 | 2.19  | 7.82E-05 | 2.38  | 1.71E-05 |
| PCSK5    | 0.43  | 4.37E-02 | 1.32  | 2.05E-08 | -0.11 | 6.41E-01 | 0.90  | 1.76E-05 | -0.54 | 1.64E-03 | -1.44 | 3.04E-09 |
| PDCD1LG2 | -0.01 | 9.98E-01 | 0.91  | 8.40E-02 | -0.41 | 5.94E-01 | 0.92  | 1.50E-01 | -0.40 | 6.03E-01 | -1.32 | 1.17E-02 |
| PDE1C    | 0.07  | 9.60E-01 | -0.27 | 5.77E-01 | -1.04 | 9.41E-03 | -0.34 | 5.75E-01 | -1.10 | 5.16E-03 | -0.76 | 4.23E-02 |
| PDE3A    | -0.31 | 7.89E-01 | -0.39 | 5.33E-01 | -2.76 | 5.89E-06 | -0.08 | 9.55E-01 | -2.45 | 2.13E-05 | -2.37 | 2.06E-05 |
| PDE4B    | -0.25 | 8.56E-01 | 0.38  | 5.57E-01 | 0.88  | 1.20E-01 | 0.63  | 3.67E-01 | 1.13  | 3.48E-02 | 0.49  | 4.38E-01 |
| PDE5A    | -0.24 | 8.85E-01 | -1.44 | 8.82E-03 | -3.31 | 3.72E-06 | -1.19 | 7.04E-02 | -3.07 | 7.02E-06 | -1.87 | 1.26E-03 |
| PDGFRA   | -0.13 | 8.83E-01 | -0.56 | 4.94E-02 | 0.50  | 1.21E-01 | -0.43 | 2.44E-01 | 0.63  | 4.13E-02 | 1.06  | 4.74E-04 |
| PDGFRL   | 0.13  | 9.75E-01 | 0.16  | 9.37E-01 | 2.42  | 4.29E-02 | 0.03  | 9.92E-01 | 2.29  | 5.35E-02 | 2.26  | 4.38E-02 |
| PDLIM1   | 0.29  | 9.26E-01 | 0.43  | 7.74E-01 | -1.85 | 7.67E-02 | 0.14  | 9.58E-01 | -2.13 | 3.47E-02 | -2.27 | 1.75E-02 |
| PEG10    | 0.13  | 9.28E-01 | 0.18  | 7.96E-01 | 1.36  | 3.43E-03 | 0.05  | 9.65E-01 | 1.24  | 6.34E-03 | 1.19  | 6.13E-03 |
| PENK     | 0.19  | 7.24E-01 | -1.02 | 9.65E-05 | 0.01  | 9.83E-01 | -1.21 | 9.28E-05 | -0.18 | 6.34E-01 | 1.03  | 1.09E-04 |
| PHLDA1   | -0.07 | 9.59E-01 | -0.94 | 7.09E-03 | 0.07  | 9.36E-01 | -0.87 | 3.18E-02 | 0.13  | 8.45E-01 | 1.01  | 5.58E-03 |
| PIK3R3   | 1.33  | 5.42E-03 | 1.43  | 2.63E-04 | 0.74  | 7.20E-02 | 0.09  | 9.20E-01 | -0.59 | 1.68E-01 | -0.68 | 7.84E-02 |
| PITPNC1  | -0.60 | 2.34E-01 | -0.69 | 3.55E-02 | 1.19  | 1.27E-03 | -0.09 | 9.11E-01 | 1.79  | 8.62E-06 | 1.88  | 3.48E-06 |
| PLA2G16  | -0.72 | 3.04E-01 | -1.04 | 1.76E-02 | -1.43 | 3.51E-03 | -0.32 | 6.85E-01 | -0.71 | 1.64E-01 | -0.39 | 5.16E-01 |
| PLA2G4A  | 0.38  | 6.55E-01 | 1.09  | 7.09E-03 | 0.37  | 5.37E-01 | 0.71  | 1.62E-01 | -0.01 | 9.92E-01 | -0.72 | 9.37E-02 |

|          |       |          |       |          |       |          |       |          |       |          |       |          |
|----------|-------|----------|-------|----------|-------|----------|-------|----------|-------|----------|-------|----------|
| PLAU     | 0.71  | 2.67E-01 | 1.01  | 1.21E-02 | -0.06 | 9.50E-01 | 0.31  | 6.71E-01 | -0.77 | 8.95E-02 | -1.08 | 1.01E-02 |
| PLAUR    | -0.69 | 3.05E-01 | -0.41 | 4.26E-01 | 0.41  | 5.03E-01 | 0.28  | 7.25E-01 | 1.10  | 1.71E-02 | 0.82  | 6.63E-02 |
| PLBD1    | 0.33  | 5.26E-01 | 0.49  | 8.02E-02 | 1.06  | 6.75E-04 | 0.16  | 7.52E-01 | 0.73  | 1.40E-02 | 0.56  | 4.69E-02 |
| PLCE1    | 0.74  | 4.20E-01 | 0.86  | 1.24E-01 | 1.47  | 1.19E-02 | 0.12  | 9.30E-01 | 0.73  | 2.64E-01 | 0.61  | 3.57E-01 |
| PLCL2    | 0.32  | 7.65E-01 | -0.03 | 9.79E-01 | 1.10  | 2.35E-02 | -0.34 | 6.63E-01 | 0.79  | 1.18E-01 | 1.13  | 1.34E-02 |
| PLEKHH2  | 0.30  | 6.55E-01 | 0.74  | 2.20E-02 | 1.14  | 1.76E-03 | 0.44  | 3.32E-01 | 0.84  | 1.71E-02 | 0.40  | 3.08E-01 |
| PLIN2    | -1.26 | 5.59E-03 | -1.82 | 1.09E-05 | -0.04 | 9.66E-01 | -0.56 | 2.15E-01 | 1.22  | 1.55E-03 | 1.79  | 1.43E-05 |
| PLK1     | -1.13 | 2.93E-01 | -1.55 | 2.13E-02 | 0.07  | 9.68E-01 | -0.42 | 7.41E-01 | 1.20  | 1.18E-01 | 1.62  | 2.00E-02 |
| PLK2     | 0.48  | 4.93E-01 | -0.24 | 6.69E-01 | 1.21  | 4.36E-03 | -0.72 | 1.30E-01 | 0.73  | 8.80E-02 | 1.45  | 4.59E-04 |
| PLK4     | -0.43 | 8.55E-01 | -0.74 | 4.82E-01 | 1.18  | 2.52E-01 | -0.32 | 8.64E-01 | 1.61  | 8.51E-02 | 1.93  | 2.55E-02 |
| PLXDC1   | 1.17  | 4.13E-01 | 1.77  | 3.43E-02 | 0.54  | 6.97E-01 | 0.60  | 6.91E-01 | -0.64 | 6.20E-01 | -1.24 | 1.86E-01 |
| PLXND1   | -0.13 | 8.18E-01 | 0.01  | 9.73E-01 | -1.13 | 2.00E-05 | 0.14  | 7.22E-01 | -1.01 | 6.35E-05 | -1.15 | 7.17E-06 |
| PMAIP1   | -0.05 | 9.86E-01 | -0.11 | 9.24E-01 | 3.04  | 4.40E-05 | -0.06 | 9.73E-01 | 3.08  | 2.62E-05 | 3.15  | 1.36E-05 |
| PODN     | 0.21  | 8.98E-01 | 0.74  | 1.64E-01 | -0.97 | 8.35E-02 | 0.54  | 4.92E-01 | -1.18 | 2.98E-02 | -1.72 | 1.14E-03 |
| PODXL    | -1.69 | 1.26E-02 | -1.92 | 4.07E-04 | 2.01  | 6.39E-04 | -0.23 | 8.37E-01 | 3.70  | 1.91E-07 | 3.93  | 5.75E-08 |
| POLQ     | -0.37 | 7.06E-01 | -0.42 | 4.45E-01 | 0.62  | 2.65E-01 | -0.05 | 9.69E-01 | 0.99  | 4.26E-02 | 1.04  | 2.37E-02 |
| PPAP2B   | 0.03  | 9.84E-01 | -0.69 | 2.06E-02 | 0.85  | 9.44E-03 | -0.71 | 4.07E-02 | 0.82  | 1.11E-02 | 1.53  | 1.27E-05 |
| PPP1R14A | 0.31  | 8.23E-01 | 0.18  | 8.43E-01 | -1.09 | 6.89E-02 | -0.13 | 9.26E-01 | -1.40 | 1.58E-02 | -1.27 | 2.09E-02 |
| PPP2R3A  | -0.05 | 9.56E-01 | 1.12  | 2.26E-05 | 0.99  | 2.28E-04 | 1.17  | 9.28E-05 | 1.04  | 1.05E-04 | -0.14 | 7.10E-01 |
| PRC1     | -1.22 | 2.05E-01 | -2.14 | 1.04E-03 | 0.11  | 9.39E-01 | -0.92 | 2.85E-01 | 1.33  | 5.66E-02 | 2.25  | 8.60E-04 |
| PRELP    | 0.57  | 5.71E-01 | 0.23  | 7.80E-01 | 1.47  | 9.83E-03 | -0.34 | 7.25E-01 | 0.90  | 1.31E-01 | 1.24  | 2.07E-02 |
| PRG4     | 0.25  | 9.62E-01 | -0.89 | 6.73E-01 | 3.89  | 1.47E-02 | -1.14 | 6.56E-01 | 3.64  | 2.06E-02 | 4.78  | 1.69E-03 |
| PRICKLE1 | 0.12  | 9.01E-01 | 0.10  | 8.47E-01 | -2.50 | 1.24E-08 | -0.02 | 9.85E-01 | -2.62 | 4.57E-09 | -2.60 | 4.07E-09 |
| PRIM1    | -0.26 | 8.72E-01 | -0.39 | 6.16E-01 | 0.99  | 1.27E-01 | -0.13 | 9.30E-01 | 1.25  | 4.12E-02 | 1.38  | 1.72E-02 |
| PRKAB2   | 0.37  | 4.16E-01 | 0.23  | 4.95E-01 | -1.03 | 6.09E-04 | -0.14 | 7.93E-01 | -1.40 | 1.26E-05 | -1.26 | 3.08E-05 |
| PRR11    | -1.06 | 3.82E-01 | -1.68 | 1.96E-02 | 0.42  | 7.36E-01 | -0.62 | 6.09E-01 | 1.48  | 6.41E-02 | 2.10  | 5.10E-03 |
| PRSS35   | 0.29  | 4.64E-01 | 0.84  | 4.02E-04 | -0.20 | 5.51E-01 | 0.54  | 4.05E-02 | -0.49 | 4.55E-02 | -1.03 | 5.27E-05 |
| PRTFDC1  | -0.13 | 9.07E-01 | -0.38 | 3.32E-01 | 0.78  | 3.33E-02 | -0.25 | 6.75E-01 | 0.91  | 1.20E-02 | 1.16  | 1.05E-03 |
| PSG4     | -0.83 | 1.96E-01 | -1.30 | 2.66E-03 | -0.06 | 9.51E-01 | -0.47 | 4.81E-01 | 0.77  | 1.13E-01 | 1.23  | 5.37E-03 |
| PSG5     | -1.29 | 2.35E-01 | -2.27 | 1.54E-03 | -0.27 | 8.45E-01 | -0.98 | 3.15E-01 | 1.02  | 2.28E-01 | 2.00  | 6.13E-03 |
| PSG7     | -1.15 | 2.56E-01 | -1.66 | 9.89E-03 | -0.26 | 8.40E-01 | -0.51 | 6.48E-01 | 0.89  | 2.60E-01 | 1.41  | 3.57E-02 |
| PSIP1    | 0.07  | 9.53E-01 | -0.53 | 1.14E-01 | 1.04  | 3.73E-03 | -0.60 | 1.30E-01 | 0.96  | 5.71E-03 | 1.57  | 2.47E-05 |
| PTER     | -0.22 | 7.67E-01 | -0.51 | 1.11E-01 | 0.90  | 8.07E-03 | -0.29 | 5.61E-01 | 1.11  | 1.09E-03 | 1.41  | 5.30E-05 |
| PTGES    | -0.58 | 4.18E-01 | -0.75 | 7.86E-02 | -2.47 | 3.72E-06 | -0.17 | 8.51E-01 | -1.89 | 8.71E-05 | -1.72 | 1.63E-04 |

|          |       |          |       |          |       |          |       |          |       |          |       |          |
|----------|-------|----------|-------|----------|-------|----------|-------|----------|-------|----------|-------|----------|
| PTGFR    | 0.31  | 6.77E-01 | -0.17 | 7.51E-01 | 1.12  | 3.59E-03 | -0.48 | 3.17E-01 | 0.81  | 3.01E-02 | 1.29  | 5.19E-04 |
| PTGFRN   | 0.45  | 2.90E-01 | 0.15  | 7.05E-01 | 1.10  | 3.48E-04 | -0.30 | 4.65E-01 | 0.65  | 2.35E-02 | 0.95  | 8.04E-04 |
| PTPLAD2  | 0.29  | 6.41E-01 | -0.35 | 3.14E-01 | 0.84  | 1.08E-02 | -0.64 | 7.86E-02 | 0.55  | 1.04E-01 | 1.19  | 2.83E-04 |
| PTTG1    | -0.99 | 3.04E-01 | -1.56 | 9.18E-03 | 0.17  | 8.99E-01 | -0.58 | 5.64E-01 | 1.15  | 8.64E-02 | 1.73  | 5.58E-03 |
| PTX3     | -0.83 | 1.96E-01 | -1.42 | 1.14E-03 | -1.08 | 2.10E-02 | -0.59 | 3.16E-01 | -0.25 | 7.23E-01 | 0.34  | 5.81E-01 |
| RAB27B   | -0.83 | 6.60E-01 | -1.14 | 2.61E-01 | -2.84 | 4.80E-03 | -0.31 | 8.83E-01 | -2.00 | 4.30E-02 | -1.70 | 7.62E-02 |
| RAB38    | 0.12  | 8.70E-01 | 0.31  | 2.60E-01 | 1.89  | 9.40E-08 | 0.19  | 6.57E-01 | 1.78  | 1.87E-07 | 1.58  | 8.22E-07 |
| RAB3B    | -1.02 | 2.51E-01 | -1.85 | 1.44E-03 | -0.05 | 9.69E-01 | -0.83 | 2.81E-01 | 0.97  | 1.40E-01 | 1.80  | 2.52E-03 |
| RAC2     | -0.77 | 3.88E-01 | -1.55 | 3.44E-03 | -1.86 | 1.71E-03 | -0.79 | 2.67E-01 | -1.09 | 5.98E-02 | -0.31 | 7.16E-01 |
| RACGAP1  | -0.54 | 4.82E-01 | -0.93 | 2.77E-02 | 0.33  | 6.13E-01 | -0.39 | 5.77E-01 | 0.86  | 6.19E-02 | 1.25  | 4.03E-03 |
| RAD51AP1 | -0.67 | 7.02E-01 | -1.02 | 2.50E-01 | 0.79  | 4.81E-01 | -0.35 | 8.39E-01 | 1.46  | 1.05E-01 | 1.81  | 2.78E-02 |
| RALGPS2  | -0.17 | 8.86E-01 | -1.01 | 8.27E-03 | 0.56  | 2.37E-01 | -0.84 | 6.75E-02 | 0.73  | 9.22E-02 | 1.57  | 2.07E-04 |
| RANBP3L  | 0.65  | 5.89E-01 | 1.13  | 6.89E-02 | -0.25 | 8.34E-01 | 0.48  | 6.54E-01 | -0.90 | 2.16E-01 | -1.37 | 2.79E-02 |
| RASA4    | 0.68  | 2.82E-01 | 0.16  | 8.14E-01 | 1.77  | 1.42E-04 | -0.52 | 3.50E-01 | 1.09  | 1.09E-02 | 1.61  | 2.04E-04 |
| RASSF9   | 0.44  | 5.43E-01 | 0.45  | 2.97E-01 | -1.12 | 7.32E-03 | 0.01  | 9.94E-01 | -1.56 | 2.83E-04 | -1.57 | 1.70E-04 |
| RBL1     | -0.55 | 5.20E-01 | -0.71 | 1.42E-01 | 0.56  | 3.39E-01 | -0.16 | 8.79E-01 | 1.11  | 2.39E-02 | 1.27  | 6.79E-03 |
| RBM8A    | 0.56  | 3.81E-01 | 0.76  | 4.71E-02 | 1.06  | 1.04E-02 | 0.20  | 7.87E-01 | 0.51  | 2.77E-01 | 0.30  | 5.74E-01 |
| RBP4     | 0.21  | 8.40E-01 | 0.37  | 4.26E-01 | 4.23  | 1.95E-10 | 0.16  | 8.42E-01 | 4.03  | 3.89E-10 | 3.86  | 9.62E-10 |
| RCAN2    | 0.43  | 6.54E-01 | -0.28 | 6.86E-01 | -0.59 | 3.24E-01 | -0.71 | 2.52E-01 | -1.02 | 4.43E-02 | -0.31 | 6.59E-01 |
| RDH10    | 0.48  | 6.92E-01 | 1.31  | 1.83E-02 | 0.84  | 2.09E-01 | 0.83  | 2.64E-01 | 0.36  | 6.88E-01 | -0.47 | 5.48E-01 |
| REV3L    | 0.19  | 8.83E-01 | 0.10  | 8.96E-01 | 1.04  | 2.45E-02 | -0.09 | 9.36E-01 | 0.85  | 6.68E-02 | 0.94  | 3.07E-02 |
| RFC3     | -0.50 | 6.38E-01 | -0.38 | 5.79E-01 | 0.79  | 1.98E-01 | 0.11  | 9.31E-01 | 1.29  | 2.04E-02 | 1.17  | 2.64E-02 |
| RGNEF    | -0.35 | 5.44E-01 | -0.62 | 4.09E-02 | 0.43  | 2.45E-01 | -0.27 | 5.93E-01 | 0.78  | 1.68E-02 | 1.06  | 9.95E-04 |
| RGS2     | -0.27 | 7.88E-01 | -0.15 | 8.23E-01 | 1.58  | 5.72E-04 | 0.11  | 9.07E-01 | 1.85  | 7.91E-05 | 1.73  | 1.07E-04 |
| RHOJ     | 0.92  | 1.59E-01 | 1.02  | 2.26E-02 | 0.62  | 2.62E-01 | 0.10  | 9.32E-01 | -0.30 | 6.79E-01 | -0.40 | 5.16E-01 |
| RNF125   | 0.07  | 9.18E-01 | -0.11 | 7.10E-01 | 1.00  | 3.24E-05 | -0.18 | 5.91E-01 | 0.93  | 6.22E-05 | 1.11  | 4.28E-06 |
| RNF141   | -0.23 | 5.24E-01 | -0.54 | 5.32E-03 | -1.00 | 2.34E-05 | -0.30 | 2.27E-01 | -0.77 | 3.89E-04 | -0.47 | 1.89E-02 |
| RNF150   | 0.06  | 9.71E-01 | 0.19  | 7.90E-01 | -1.04 | 3.16E-02 | 0.13  | 9.00E-01 | -1.10 | 2.09E-02 | -1.23 | 6.78E-03 |
| RNF180   | -0.01 | 9.98E-01 | 0.19  | 7.45E-01 | -2.07 | 1.51E-05 | 0.20  | 7.95E-01 | -2.06 | 1.02E-05 | -2.26 | 2.30E-06 |
| RNF19B   | 0.51  | 2.32E-01 | 1.15  | 1.28E-04 | 0.86  | 5.34E-03 | 0.64  | 5.07E-02 | 0.34  | 3.30E-01 | -0.30 | 4.03E-01 |
| ROR1     | 0.57  | 6.35E-02 | 1.11  | 1.66E-05 | 0.29  | 3.09E-01 | 0.53  | 3.80E-02 | -0.28 | 3.07E-01 | -0.82 | 5.63E-04 |
| RPS4Y1   | -0.09 | 9.79E-01 | -0.04 | 9.83E-01 | 4.64  | 2.26E-05 | 0.05  | 9.86E-01 | 4.73  | 1.23E-05 | 4.68  | 9.54E-06 |
| RSAD2    | 0.06  | 9.76E-01 | 1.94  | 5.15E-04 | 0.13  | 9.14E-01 | 1.88  | 3.17E-03 | 0.07  | 9.54E-01 | -1.81 | 1.37E-03 |
| RUNX2    | -0.54 | 4.75E-01 | -0.51 | 2.86E-01 | -1.28 | 5.48E-03 | 0.03  | 9.81E-01 | -0.75 | 1.15E-01 | -0.78 | 7.77E-02 |

|          |       |          |       |          |       |          |       |          |       |          |       |          |
|----------|-------|----------|-------|----------|-------|----------|-------|----------|-------|----------|-------|----------|
| SAMD5    | 0.34  | 6.22E-01 | 0.55  | 1.21E-01 | -0.50 | 2.28E-01 | 0.21  | 7.42E-01 | -0.84 | 2.26E-02 | -1.05 | 2.98E-03 |
| SAMD9    | -0.06 | 9.68E-01 | 1.11  | 5.48E-03 | 0.22  | 7.59E-01 | 1.17  | 1.15E-02 | 0.27  | 6.67E-01 | -0.89 | 3.08E-02 |
| SAMD9L   | 0.47  | 2.82E-01 | 1.51  | 4.48E-06 | 0.51  | 9.89E-02 | 1.04  | 1.80E-03 | 0.04  | 9.42E-01 | -1.00 | 6.63E-04 |
| SATB2    | 0.13  | 9.32E-01 | 0.45  | 3.82E-01 | -1.07 | 2.53E-02 | 0.33  | 6.70E-01 | -1.20 | 1.13E-02 | -1.52 | 9.51E-04 |
| SBSN     | -1.09 | 1.89E-01 | -1.22 | 2.83E-02 | -0.03 | 9.85E-01 | -0.13 | 9.27E-01 | 1.06  | 8.63E-02 | 1.19  | 3.75E-02 |
| SC4MOL   | 1.30  | 1.28E-02 | 1.19  | 3.10E-03 | 0.36  | 5.41E-01 | -0.11 | 9.13E-01 | -0.94 | 3.01E-02 | -0.83 | 4.46E-02 |
| SC5DL    | 0.76  | 1.42E-01 | 1.03  | 4.03E-03 | 0.30  | 5.70E-01 | 0.26  | 6.77E-01 | -0.46 | 2.98E-01 | -0.73 | 4.93E-02 |
| SCARA3   | -0.15 | 8.83E-01 | -0.43 | 2.58E-01 | 2.00  | 4.85E-06 | -0.28 | 6.37E-01 | 2.16  | 1.46E-06 | 2.44  | 1.38E-07 |
| SCARNA9L | -0.28 | 7.66E-01 | -0.33 | 5.18E-01 | 0.83  | 5.54E-02 | -0.05 | 9.65E-01 | 1.11  | 9.01E-03 | 1.16  | 4.21E-03 |
| SCG2     | -0.36 | 2.48E-01 | 0.55  | 5.11E-03 | -0.48 | 2.86E-02 | 0.91  | 3.21E-04 | -0.12 | 7.14E-01 | -1.03 | 1.12E-05 |
| SCG5     | 0.07  | 9.61E-01 | -0.48 | 3.24E-01 | 0.53  | 3.25E-01 | -0.55 | 3.51E-01 | 0.46  | 4.14E-01 | 1.01  | 1.94E-02 |
| SCRG1    | 0.63  | 7.79E-01 | 1.52  | 1.18E-01 | 2.75  | 6.89E-03 | 0.89  | 5.62E-01 | 2.12  | 3.49E-02 | 1.23  | 2.51E-01 |
| SCUBE3   | -0.49 | 7.46E-01 | -0.17 | 8.91E-01 | -1.95 | 7.12E-03 | 0.33  | 8.08E-01 | -1.46 | 4.29E-02 | -1.78 | 8.62E-03 |
| SDC2     | 0.33  | 2.80E-01 | 0.61  | 1.68E-03 | -0.45 | 3.24E-02 | 0.28  | 2.70E-01 | -0.78 | 3.27E-04 | -1.06 | 5.09E-06 |
| SELENBP1 | 0.13  | 8.99E-01 | -0.41 | 2.39E-01 | -0.93 | 7.91E-03 | -0.54 | 1.78E-01 | -1.06 | 2.36E-03 | -0.52 | 1.36E-01 |
| SEMA3A   | 0.30  | 9.38E-01 | 0.75  | 6.43E-01 | -2.37 | 6.11E-02 | 0.45  | 8.59E-01 | -2.67 | 3.00E-02 | -3.11 | 7.79E-03 |
| SEPT6    | -0.08 | 9.20E-01 | -0.11 | 7.63E-01 | 1.24  | 2.26E-05 | -0.03 | 9.59E-01 | 1.32  | 7.02E-06 | 1.36  | 3.65E-06 |
| SEPW1    | 0.65  | 1.11E-01 | 0.23  | 5.27E-01 | -0.88 | 5.24E-03 | -0.42 | 2.78E-01 | -1.53 | 1.08E-05 | -1.11 | 3.15E-04 |
| SERPINB2 | -0.01 | 9.98E-01 | 1.32  | 2.39E-01 | -2.95 | 8.21E-03 | 1.34  | 3.51E-01 | -2.94 | 7.69E-03 | -4.28 | 1.42E-04 |
| SERPINF1 | 0.79  | 5.39E-01 | 1.28  | 6.18E-02 | 1.56  | 3.58E-02 | 0.49  | 6.88E-01 | 0.77  | 3.87E-01 | 0.28  | 8.14E-01 |
| SERTAD4  | 0.63  | 5.84E-01 | 0.83  | 1.89E-01 | -1.46 | 2.33E-02 | 0.20  | 8.83E-01 | -2.09 | 1.24E-03 | -2.29 | 3.16E-04 |
| SESN3    | 0.35  | 6.45E-01 | 0.05  | 9.47E-01 | -0.82 | 4.72E-02 | -0.30 | 6.33E-01 | -1.17 | 3.77E-03 | -0.86 | 2.37E-02 |
| SFRP2    | 0.25  | 9.23E-01 | 2.15  | 5.34E-03 | 1.68  | 4.99E-02 | 1.90  | 3.53E-02 | 1.43  | 1.00E-01 | -0.47 | 7.04E-01 |
| SGCD     | 0.54  | 2.43E-01 | 0.75  | 1.18E-02 | 1.04  | 2.00E-03 | 0.21  | 7.02E-01 | 0.50  | 1.51E-01 | 0.29  | 4.68E-01 |
| SGK1     | -0.11 | 8.26E-01 | -0.13 | 6.23E-01 | 0.92  | 4.97E-05 | -0.02 | 9.70E-01 | 1.03  | 8.62E-06 | 1.05  | 4.65E-06 |
| SGOL1    | -0.76 | 5.42E-01 | -0.87 | 2.30E-01 | 0.87  | 2.93E-01 | -0.10 | 9.57E-01 | 1.63  | 2.12E-02 | 1.73  | 1.01E-02 |
| SGOL2    | -0.26 | 8.30E-01 | -0.12 | 8.87E-01 | 0.90  | 8.47E-02 | 0.14  | 8.99E-01 | 1.16  | 2.09E-02 | 1.02  | 3.31E-02 |
| SH2D4A   | -0.77 | 1.57E-01 | -0.56 | 1.59E-01 | 0.27  | 6.41E-01 | 0.21  | 7.72E-01 | 1.04  | 9.94E-03 | 0.83  | 3.01E-02 |
| SH3BGR2  | 0.33  | 6.78E-01 | -0.08 | 9.08E-01 | -0.93 | 2.20E-02 | -0.41 | 4.74E-01 | -1.26 | 1.98E-03 | -0.85 | 2.56E-02 |
| SHOX     | 0.13  | 8.72E-01 | -0.06 | 9.10E-01 | 1.23  | 1.42E-04 | -0.19 | 7.12E-01 | 1.10  | 3.80E-04 | 1.29  | 3.94E-05 |
| SHOX     | 0.13  | 8.72E-01 | -0.06 | 9.10E-01 | 1.23  | 1.42E-04 | -0.19 | 7.12E-01 | 1.10  | 3.80E-04 | 1.29  | 3.94E-05 |
| SIDT2    | 0.05  | 9.61E-01 | 0.07  | 8.97E-01 | -1.28 | 1.18E-04 | 0.02  | 9.87E-01 | -1.33 | 6.14E-05 | -1.34 | 3.08E-05 |
| SIRPA    | -0.26 | 7.81E-01 | -0.29 | 5.76E-01 | 0.95  | 2.34E-02 | -0.03 | 9.82E-01 | 1.20  | 3.60E-03 | 1.23  | 1.99E-03 |
| SKA1     | -0.30 | 7.28E-01 | -0.49 | 2.35E-01 | 0.54  | 2.34E-01 | -0.19 | 7.95E-01 | 0.84  | 3.93E-02 | 1.03  | 7.41E-03 |

|             |       |          |       |          |       |          |       |          |       |          |       |          |
|-------------|-------|----------|-------|----------|-------|----------|-------|----------|-------|----------|-------|----------|
| SKA3        | -0.59 | 6.98E-01 | -1.11 | 1.29E-01 | 1.02  | 2.28E-01 | -0.52 | 6.73E-01 | 1.61  | 3.31E-02 | 2.13  | 3.24E-03 |
| SLC14A1     | -0.03 | 9.95E-01 | -3.03 | 4.19E-04 | -1.38 | 1.50E-01 | -3.00 | 2.34E-03 | -1.35 | 1.53E-01 | 1.65  | 5.37E-02 |
| SLC16A9     | 0.25  | 6.96E-01 | -0.09 | 8.58E-01 | 1.23  | 3.46E-04 | -0.35 | 4.32E-01 | 0.97  | 2.64E-03 | 1.32  | 7.34E-05 |
| SLC1A3      | 1.15  | 1.61E-01 | 1.46  | 8.99E-03 | 0.74  | 3.01E-01 | 0.31  | 7.81E-01 | -0.41 | 6.37E-01 | -0.72 | 2.75E-01 |
| SLC22A3     | -0.93 | 2.43E-01 | -0.55 | 3.65E-01 | -1.80 | 1.88E-03 | 0.38  | 6.83E-01 | -0.87 | 1.43E-01 | -1.25 | 1.87E-02 |
| SLC25A20    | -0.06 | 9.54E-01 | 0.31  | 3.65E-01 | -0.73 | 2.40E-02 | 0.38  | 3.66E-01 | -0.66 | 3.81E-02 | -1.04 | 8.48E-04 |
| SLC2A1      | -0.55 | 3.38E-01 | -0.19 | 7.32E-01 | -1.15 | 3.60E-03 | 0.37  | 5.11E-01 | -0.59 | 1.46E-01 | -0.96 | 8.49E-03 |
| SLC35F2     | -0.11 | 9.01E-01 | -0.16 | 6.97E-01 | 1.17  | 2.73E-04 | -0.05 | 9.48E-01 | 1.28  | 7.63E-05 | 1.33  | 2.98E-05 |
| SLC38A1     | -0.25 | 8.89E-01 | -0.25 | 7.88E-01 | 1.31  | 4.03E-02 | 0.00  | 9.98E-01 | 1.56  | 1.27E-02 | 1.56  | 8.74E-03 |
| SLC39A8     | -0.04 | 9.85E-01 | 0.73  | 9.94E-02 | 1.35  | 4.30E-03 | 0.77  | 1.52E-01 | 1.39  | 2.90E-03 | 0.62  | 1.96E-01 |
| SLC41A2     | 0.42  | 2.34E-01 | 1.01  | 7.32E-05 | 0.23  | 4.77E-01 | 0.59  | 2.90E-02 | -0.19 | 5.71E-01 | -0.78 | 1.32E-03 |
| SLC43A3     | -1.09 | 9.47E-02 | -1.77 | 2.74E-04 | 1.47  | 3.84E-03 | -0.68 | 2.69E-01 | 2.57  | 6.90E-06 | 3.25  | 1.45E-07 |
| SLC44A2     | 0.22  | 7.04E-01 | 0.36  | 2.08E-01 | -1.17 | 1.56E-04 | 0.14  | 7.88E-01 | -1.39 | 1.34E-05 | -1.54 | 2.89E-06 |
| SLC46A3     | 0.11  | 9.49E-01 | 0.39  | 5.18E-01 | -0.82 | 1.19E-01 | 0.28  | 7.51E-01 | -0.93 | 6.70E-02 | -1.21 | 1.07E-02 |
| SLC7A2      | -0.04 | 9.86E-01 | 0.02  | 9.85E-01 | 1.33  | 4.60E-02 | 0.07  | 9.69E-01 | 1.37  | 3.55E-02 | 1.31  | 3.56E-02 |
| SLC9A9      | 0.55  | 7.24E-01 | 0.01  | 9.96E-01 | 1.48  | 5.27E-02 | -0.54 | 6.54E-01 | 0.93  | 2.70E-01 | 1.48  | 3.84E-02 |
| SLIT2       | 0.27  | 8.74E-01 | 1.25  | 3.37E-02 | 1.67  | 9.54E-03 | 0.98  | 1.94E-01 | 1.40  | 2.84E-02 | 0.42  | 6.35E-01 |
| SLIT3       | 0.66  | 3.39E-01 | 1.14  | 6.87E-03 | 0.83  | 8.29E-02 | 0.48  | 4.52E-01 | 0.17  | 8.35E-01 | -0.32 | 6.13E-01 |
| SMAD3       | -0.19 | 7.24E-01 | -1.12 | 3.10E-05 | 0.05  | 9.25E-01 | -0.93 | 1.33E-03 | 0.24  | 4.61E-01 | 1.17  | 2.05E-05 |
| SMAD9       | -0.66 | 7.57E-02 | -0.65 | 1.28E-02 | 0.57  | 5.36E-02 | 0.00  | 9.97E-01 | 1.22  | 7.41E-05 | 1.22  | 4.71E-05 |
| SMC2        | -0.48 | 4.83E-01 | -0.31 | 5.28E-01 | 0.53  | 2.58E-01 | 0.17  | 8.31E-01 | 1.00  | 1.36E-02 | 0.84  | 3.13E-02 |
| SMC4        | -0.25 | 5.59E-01 | -0.22 | 4.15E-01 | 0.83  | 1.09E-03 | 0.03  | 9.61E-01 | 1.09  | 4.70E-05 | 1.06  | 3.94E-05 |
| SMOC2       | 0.64  | 8.24E-01 | 1.45  | 2.37E-01 | -1.49 | 2.89E-01 | 0.81  | 6.86E-01 | -2.13 | 8.69E-02 | -2.94 | 1.03E-02 |
| SNORA42     | -0.09 | 9.35E-01 | -0.69 | 2.96E-02 | -1.19 | 8.76E-04 | -0.60 | 1.22E-01 | -1.10 | 1.55E-03 | -0.50 | 1.48E-01 |
| SNORA5A     | -0.32 | 7.62E-01 | -0.37 | 5.26E-01 | -1.15 | 1.90E-02 | -0.05 | 9.71E-01 | -0.83 | 9.88E-02 | -0.78 | 1.02E-01 |
| SNORA75     | -0.56 | 5.01E-01 | -1.05 | 2.06E-02 | -1.98 | 1.95E-04 | -0.49 | 4.94E-01 | -1.42 | 3.98E-03 | -0.93 | 4.74E-02 |
| SNORD116-17 | 0.27  | 6.47E-01 | 0.01  | 9.86E-01 | -0.81 | 8.78E-03 | -0.25 | 5.88E-01 | -1.08 | 6.19E-04 | -0.82 | 4.91E-03 |
| SNORD116-17 | 0.27  | 6.47E-01 | 0.01  | 9.86E-01 | -0.81 | 8.78E-03 | -0.25 | 5.88E-01 | -1.08 | 6.19E-04 | -0.82 | 4.91E-03 |
| SNORD116-2  | 0.64  | 1.55E-01 | -0.12 | 8.22E-01 | -0.46 | 2.18E-01 | -0.76 | 3.47E-02 | -1.11 | 1.23E-03 | -0.35 | 3.73E-01 |
| SNORD116-3  | 0.53  | 2.63E-01 | 0.13  | 7.96E-01 | -0.87 | 7.97E-03 | -0.40 | 3.41E-01 | -1.40 | 6.89E-05 | -1.00 | 1.46E-03 |
| SNORD116-3  | 0.53  | 2.63E-01 | 0.13  | 7.96E-01 | -0.87 | 7.97E-03 | -0.40 | 3.41E-01 | -1.40 | 6.89E-05 | -1.00 | 1.46E-03 |
| SNORD116-5  | 0.62  | 3.03E-01 | 0.16  | 8.04E-01 | -0.78 | 6.52E-02 | -0.47 | 3.99E-01 | -1.40 | 8.83E-04 | -0.93 | 1.66E-02 |
| SNORD116-5  | 0.62  | 3.03E-01 | 0.16  | 8.04E-01 | -0.78 | 6.52E-02 | -0.47 | 3.99E-01 | -1.40 | 8.83E-04 | -0.93 | 1.66E-02 |
| SNORD116-6  | 0.28  | 7.44E-01 | -0.31 | 5.21E-01 | -0.89 | 2.85E-02 | -0.59 | 2.22E-01 | -1.17 | 3.61E-03 | -0.58 | 1.52E-01 |

|            |       |          |       |          |       |          |       |          |       |          |       |          |
|------------|-------|----------|-------|----------|-------|----------|-------|----------|-------|----------|-------|----------|
| SNORD116-8 | 0.38  | 5.32E-01 | -0.03 | 9.69E-01 | -1.13 | 1.54E-03 | -0.40 | 3.81E-01 | -1.51 | 5.89E-05 | -1.11 | 9.91E-04 |
| SNORD14C   | 0.00  | 9.98E-01 | -0.12 | 8.75E-01 | 0.96  | 3.11E-02 | -0.12 | 9.03E-01 | 0.96  | 2.94E-02 | 1.08  | 9.93E-03 |
| SNORD33    | 0.37  | 5.28E-01 | 0.22  | 5.99E-01 | -0.93 | 6.29E-03 | -0.15 | 8.21E-01 | -1.30 | 2.28E-04 | -1.16 | 5.22E-04 |
| SNORD49B   | -0.25 | 6.25E-01 | -1.08 | 9.98E-05 | 0.12  | 8.09E-01 | -0.82 | 5.78E-03 | 0.37  | 2.26E-01 | 1.20  | 3.94E-05 |
| SNORD82    | -0.26 | 7.93E-01 | -0.60 | 1.57E-01 | 0.72  | 1.15E-01 | -0.35 | 6.07E-01 | 0.98  | 2.36E-02 | 1.33  | 1.58E-03 |
| SOCS2      | -0.29 | 4.59E-01 | -0.89 | 1.49E-04 | 0.75  | 2.15E-03 | -0.61 | 1.67E-02 | 1.04  | 5.94E-05 | 1.64  | 6.58E-08 |
| SOD2       | -0.24 | 8.85E-01 | -0.41 | 5.88E-01 | 0.81  | 2.28E-01 | -0.16 | 9.02E-01 | 1.06  | 8.81E-02 | 1.22  | 3.30E-02 |
| SORBS2     | -0.04 | 9.53E-01 | -0.06 | 8.55E-01 | -2.23 | 1.95E-10 | -0.02 | 9.73E-01 | -2.19 | 2.32E-10 | -2.17 | 2.63E-10 |
| SORT1      | 0.07  | 9.54E-01 | -0.26 | 4.97E-01 | -1.86 | 2.38E-06 | -0.33 | 4.84E-01 | -1.93 | 1.18E-06 | -1.60 | 8.40E-06 |
| SP110      | -0.09 | 9.46E-01 | 1.07  | 2.76E-03 | 0.41  | 3.83E-01 | 1.16  | 5.45E-03 | 0.50  | 2.47E-01 | -0.66 | 7.84E-02 |
| SPAG5      | -0.62 | 6.17E-01 | -0.85 | 1.98E-01 | 0.65  | 4.41E-01 | -0.23 | 8.65E-01 | 1.27  | 5.91E-02 | 1.51  | 1.71E-02 |
| SPATA18    | 0.68  | 2.24E-02 | 0.54  | 1.57E-02 | -0.36 | 1.81E-01 | -0.14 | 7.48E-01 | -1.03 | 7.87E-05 | -0.90 | 2.55E-04 |
| SPC25      | -0.36 | 7.94E-01 | -0.56 | 4.12E-01 | 0.70  | 3.33E-01 | -0.20 | 8.79E-01 | 1.06  | 8.95E-02 | 1.26  | 2.92E-02 |
| SPICE1     | 0.09  | 9.06E-01 | 0.85  | 2.98E-04 | -0.27 | 3.62E-01 | 0.76  | 3.43E-03 | -0.35 | 1.74E-01 | -1.11 | 1.71E-05 |
| SPP1       | -0.12 | 9.61E-01 | 0.89  | 2.13E-01 | -0.77 | 3.76E-01 | 1.00  | 2.46E-01 | -0.65 | 4.74E-01 | -1.65 | 1.38E-02 |
| SPTLC3     | 0.28  | 8.68E-01 | -0.67 | 3.06E-01 | 0.81  | 2.52E-01 | -0.95 | 1.99E-01 | 0.53  | 5.15E-01 | 1.48  | 1.19E-02 |
| SQLE       | 1.10  | 1.02E-02 | 1.42  | 7.32E-05 | 0.55  | 1.49E-01 | 0.32  | 5.51E-01 | -0.55 | 1.36E-01 | -0.87 | 9.22E-03 |
| SRGN       | -0.12 | 9.64E-01 | -0.40 | 7.22E-01 | -4.41 | 3.72E-06 | -0.28 | 8.64E-01 | -4.29 | 4.22E-06 | -4.01 | 6.81E-06 |
| SRPX2      | 0.42  | 5.22E-01 | 0.13  | 8.21E-01 | -0.74 | 5.56E-02 | -0.29 | 6.30E-01 | -1.16 | 2.36E-03 | -0.87 | 1.47E-02 |
| ST8SIA1    | 0.91  | 3.44E-01 | 1.74  | 3.05E-03 | 0.49  | 5.71E-01 | 0.83  | 2.94E-01 | -0.41 | 6.51E-01 | -1.25 | 3.86E-02 |
| ST8SIA1    | 1.11  | 1.33E-01 | 1.83  | 4.91E-04 | 0.91  | 1.14E-01 | 0.72  | 2.89E-01 | -0.19 | 8.37E-01 | -0.92 | 8.49E-02 |
| STAMBPL1   | -0.09 | 9.30E-01 | -0.06 | 9.22E-01 | 1.68  | 1.86E-05 | 0.04  | 9.70E-01 | 1.77  | 6.02E-06 | 1.74  | 5.40E-06 |
| STARD4     | 1.15  | 1.75E-01 | 1.67  | 3.58E-03 | -0.36 | 7.04E-01 | 0.53  | 5.80E-01 | -1.51 | 1.48E-02 | -2.04 | 8.18E-04 |
| STAT4      | 0.36  | 7.40E-01 | 0.29  | 6.67E-01 | -1.37 | 8.17E-03 | -0.07 | 9.60E-01 | -1.72 | 9.42E-04 | -1.66 | 8.78E-04 |
| STC1       | -1.49 | 1.17E-02 | -1.45 | 1.58E-03 | -1.07 | 3.12E-02 | 0.04  | 9.75E-01 | 0.42  | 5.09E-01 | 0.38  | 5.43E-01 |
| STC2       | -0.96 | 1.57E-01 | -1.03 | 2.79E-02 | -1.40 | 6.37E-03 | -0.06 | 9.62E-01 | -0.44 | 5.10E-01 | -0.37 | 5.74E-01 |
| STEAP1     | -0.44 | 7.46E-01 | 0.17  | 8.72E-01 | 1.26  | 5.26E-02 | 0.61  | 5.13E-01 | 1.70  | 7.54E-03 | 1.09  | 7.68E-02 |
| STEAP2     | -0.17 | 9.27E-01 | -0.32 | 6.89E-01 | 1.52  | 1.20E-02 | -0.16 | 9.08E-01 | 1.68  | 4.81E-03 | 1.84  | 1.46E-03 |
| STEAP4     | -0.05 | 9.95E-01 | -2.00 | 1.55E-01 | 2.54  | 8.73E-02 | -1.95 | 2.71E-01 | 2.59  | 7.71E-02 | 4.54  | 1.12E-03 |
| STIL       | -0.29 | 8.19E-01 | -0.05 | 9.59E-01 | 0.81  | 1.64E-01 | 0.24  | 8.14E-01 | 1.10  | 4.14E-02 | 0.86  | 1.04E-01 |
| STK32B     | 0.22  | 9.01E-01 | 1.10  | 4.27E-02 | 0.21  | 8.43E-01 | 0.88  | 2.04E-01 | -0.01 | 9.98E-01 | -0.89 | 1.29E-01 |
| STMN1      | -0.85 | 2.62E-01 | -1.71 | 6.57E-04 | 0.02  | 9.88E-01 | -0.85 | 1.59E-01 | 0.87  | 1.11E-01 | 1.72  | 8.11E-04 |
| STYXL1     | -0.21 | 7.13E-01 | -0.69 | 6.63E-03 | -1.02 | 5.20E-04 | -0.48 | 1.26E-01 | -0.81 | 3.63E-03 | -0.33 | 2.82E-01 |
| SVIL       | 0.37  | 8.05E-01 | -0.32 | 7.21E-01 | 1.14  | 8.74E-02 | -0.69 | 4.34E-01 | 0.77  | 2.97E-01 | 1.46  | 1.66E-02 |

|          |       |          |       |          |       |          |       |          |       |          |       |          |
|----------|-------|----------|-------|----------|-------|----------|-------|----------|-------|----------|-------|----------|
| SYDE2    | 0.31  | 5.97E-01 | 0.26  | 4.95E-01 | -1.19 | 4.55E-04 | -0.05 | 9.45E-01 | -1.50 | 2.18E-05 | -1.45 | 2.28E-05 |
| SYNE2    | -0.42 | 2.43E-01 | 0.12  | 7.33E-01 | 1.01  | 2.14E-04 | 0.54  | 4.67E-02 | 1.43  | 2.07E-06 | 0.89  | 4.27E-04 |
| SYNPO2   | 0.32  | 5.37E-01 | 0.07  | 8.84E-01 | -0.85 | 4.18E-03 | -0.24 | 5.85E-01 | -1.17 | 1.59E-04 | -0.93 | 1.11E-03 |
| SYT14    | -1.13 | 2.58E-01 | -1.35 | 3.65E-02 | -0.49 | 6.22E-01 | -0.21 | 8.86E-01 | 0.64  | 4.69E-01 | 0.86  | 2.49E-01 |
| TACC3    | -0.42 | 7.53E-01 | -0.79 | 2.05E-01 | 0.58  | 4.62E-01 | -0.37 | 7.33E-01 | 1.00  | 1.21E-01 | 1.37  | 1.97E-02 |
| TAGLN    | 0.14  | 9.51E-01 | -0.29 | 7.77E-01 | -2.21 | 2.03E-03 | -0.44 | 7.12E-01 | -2.35 | 9.32E-04 | -1.92 | 3.88E-03 |
| TANC1    | 0.39  | 6.91E-01 | 0.53  | 3.10E-01 | -0.55 | 3.59E-01 | 0.14  | 8.99E-01 | -0.93 | 6.00E-02 | -1.07 | 2.12E-02 |
| TBC1D8   | -0.06 | 9.61E-01 | -0.30 | 5.03E-01 | 0.76  | 4.67E-02 | -0.24 | 7.10E-01 | 0.82  | 2.83E-02 | 1.06  | 3.24E-03 |
| TBC1D8B  | 0.00  | 9.98E-01 | 0.50  | 5.10E-02 | -0.50 | 7.82E-02 | 0.50  | 1.04E-01 | -0.50 | 7.58E-02 | -1.00 | 2.83E-04 |
| TBL1X    | -0.33 | 3.63E-01 | -0.83 | 2.98E-04 | 0.36  | 1.54E-01 | -0.50 | 4.88E-02 | 0.69  | 3.48E-03 | 1.19  | 5.58E-06 |
| TCP11L2  | -0.49 | 6.81E-01 | -1.62 | 3.63E-03 | 0.05  | 9.71E-01 | -1.13 | 9.16E-02 | 0.54  | 4.88E-01 | 1.67  | 3.76E-03 |
| TES      | 0.29  | 6.57E-01 | 0.50  | 1.39E-01 | -0.66 | 6.41E-02 | 0.20  | 7.33E-01 | -0.95 | 5.91E-03 | -1.16 | 6.89E-04 |
| TEX2     | 0.23  | 4.57E-01 | 1.11  | 1.14E-06 | -0.19 | 4.45E-01 | 0.87  | 1.22E-04 | -0.42 | 2.84E-02 | -1.30 | 9.36E-08 |
| TFPI     | -0.03 | 9.86E-01 | -0.25 | 6.89E-01 | -1.95 | 1.17E-04 | -0.22 | 7.99E-01 | -1.92 | 1.10E-04 | -1.70 | 2.71E-04 |
| TFRC     | -1.45 | 1.22E-03 | -0.76 | 2.96E-02 | -0.49 | 2.52E-01 | 0.69  | 1.10E-01 | 0.96  | 1.17E-02 | 0.27  | 5.95E-01 |
| TGFB2    | 0.50  | 4.54E-01 | -0.07 | 9.24E-01 | 0.98  | 1.85E-02 | -0.57 | 2.58E-01 | 0.48  | 3.21E-01 | 1.05  | 7.42E-03 |
| TGFB3    | 0.71  | 2.04E-01 | 0.84  | 2.31E-02 | 1.05  | 9.82E-03 | 0.13  | 8.80E-01 | 0.34  | 5.26E-01 | 0.21  | 7.26E-01 |
| TGM2     | -0.32 | 8.63E-01 | 0.35  | 7.14E-01 | -1.87 | 8.28E-03 | 0.67  | 5.09E-01 | -1.55 | 2.61E-02 | -2.22 | 1.08E-03 |
| THBS4    | 0.05  | 9.89E-01 | 0.30  | 8.11E-01 | 4.04  | 2.16E-05 | 0.26  | 8.85E-01 | 3.99  | 1.65E-05 | 3.73  | 2.54E-05 |
| THRB     | 0.21  | 7.65E-01 | 0.18  | 6.91E-01 | 1.80  | 3.72E-06 | -0.04 | 9.65E-01 | 1.58  | 1.36E-05 | 1.62  | 7.09E-06 |
| TIGD2    | -0.63 | 2.02E-02 | -0.73 | 5.77E-04 | -1.14 | 9.88E-06 | -0.10 | 8.11E-01 | -0.51 | 2.23E-02 | -0.41 | 5.72E-02 |
| TIPARP   | 1.11  | 3.40E-03 | 1.09  | 4.00E-04 | 0.23  | 6.00E-01 | -0.02 | 9.82E-01 | -0.87 | 5.99E-03 | -0.85 | 5.03E-03 |
| TJP2     | -0.10 | 8.95E-01 | 0.25  | 3.59E-01 | 1.15  | 4.97E-05 | 0.35  | 2.62E-01 | 1.25  | 1.25E-05 | 0.89  | 4.09E-04 |
| TLCD1    | 0.43  | 1.04E-01 | 1.13  | 1.56E-06 | 0.07  | 8.45E-01 | 0.70  | 1.80E-03 | -0.36 | 8.27E-02 | -1.06 | 3.50E-06 |
| TLR3     | 0.45  | 5.94E-01 | 1.00  | 1.84E-02 | 0.36  | 5.76E-01 | 0.55  | 3.66E-01 | -0.10 | 9.16E-01 | -0.65 | 1.72E-01 |
| TM4SF1   | 0.17  | 8.37E-01 | -0.45 | 1.99E-01 | 0.92  | 8.97E-03 | -0.62 | 1.15E-01 | 0.75  | 3.22E-02 | 1.37  | 1.25E-04 |
| TMCO7    | 0.29  | 7.35E-01 | 0.72  | 5.14E-02 | -0.94 | 2.02E-02 | 0.44  | 4.17E-01 | -1.22 | 2.41E-03 | -1.66 | 6.10E-05 |
| TMEM106A | -0.05 | 9.61E-01 | 0.54  | 9.58E-02 | -0.47 | 2.09E-01 | 0.59  | 1.23E-01 | -0.42 | 2.78E-01 | -1.01 | 1.99E-03 |
| TMEM117  | 0.45  | 2.39E-01 | 1.15  | 4.22E-05 | -0.03 | 9.61E-01 | 0.70  | 1.58E-02 | -0.48 | 8.17E-02 | -1.18 | 3.47E-05 |
| TMEM154  | 0.09  | 9.44E-01 | -0.23 | 6.45E-01 | 1.33  | 6.65E-04 | -0.31 | 5.88E-01 | 1.24  | 1.11E-03 | 1.56  | 6.10E-05 |
| TMEM195  | 0.09  | 8.98E-01 | 0.02  | 9.57E-01 | 1.97  | 8.15E-09 | -0.07 | 8.98E-01 | 1.88  | 1.54E-08 | 1.95  | 6.12E-09 |
| TMEM30B  | 0.28  | 7.79E-01 | 0.39  | 4.43E-01 | 1.03  | 2.19E-02 | 0.11  | 9.14E-01 | 0.75  | 1.03E-01 | 0.64  | 1.54E-01 |
| TMEM45A  | -0.17 | 7.02E-01 | 0.01  | 9.72E-01 | -0.99 | 5.70E-05 | 0.19  | 5.85E-01 | -0.82 | 3.80E-04 | -1.00 | 2.21E-05 |
| TMPO     | -0.04 | 9.82E-01 | -0.38 | 4.78E-01 | 0.67  | 1.82E-01 | -0.34 | 6.43E-01 | 0.71  | 1.45E-01 | 1.05  | 1.61E-02 |



|           |       |          |       |          |       |          |       |          |       |          |       |          |
|-----------|-------|----------|-------|----------|-------|----------|-------|----------|-------|----------|-------|----------|
| TNC       | 0.32  | 6.80E-01 | 1.06  | 3.04E-03 | 0.87  | 2.57E-02 | 0.75  | 8.07E-02 | 0.56  | 1.81E-01 | -0.19 | 7.46E-01 |
| TNFAIP6   | 0.19  | 9.24E-01 | 2.68  | 5.39E-05 | 1.69  | 9.61E-03 | 2.49  | 6.98E-04 | 1.50  | 2.01E-02 | -0.99 | 1.23E-01 |
| TNFRSF10D | -0.03 | 9.87E-01 | -1.13 | 1.28E-02 | -0.40 | 5.55E-01 | -1.10 | 3.97E-02 | -0.37 | 5.96E-01 | 0.73  | 1.43E-01 |
| TNFRSF19  | 0.62  | 9.79E-02 | -0.10 | 8.19E-01 | -0.81 | 5.65E-03 | -0.72 | 1.88E-02 | -1.43 | 1.02E-05 | -0.71 | 9.48E-03 |
| TNIK      | -0.66 | 4.72E-01 | -0.45 | 4.88E-01 | -1.54 | 6.40E-03 | 0.21  | 8.52E-01 | -0.88 | 1.35E-01 | -1.09 | 4.05E-02 |
| TNS3      | -0.50 | 2.77E-01 | -0.34 | 2.98E-01 | -1.21 | 2.99E-04 | 0.15  | 7.88E-01 | -0.71 | 2.30E-02 | -0.87 | 3.89E-03 |
| TOB2      | -0.21 | 8.37E-01 | -0.64 | 1.04E-01 | 0.62  | 1.65E-01 | -0.43 | 4.43E-01 | 0.82  | 4.64E-02 | 1.25  | 1.55E-03 |
| TOB2      | -0.21 | 8.37E-01 | -0.64 | 1.04E-01 | 0.62  | 1.65E-01 | -0.43 | 4.43E-01 | 0.82  | 4.64E-02 | 1.25  | 1.55E-03 |
| TOP2A     | -1.32 | 2.65E-01 | -2.42 | 1.61E-03 | 0.38  | 7.82E-01 | -1.10 | 2.80E-01 | 1.70  | 3.82E-02 | 2.80  | 5.47E-04 |
| TPK1      | 0.53  | 3.00E-01 | 1.19  | 3.96E-04 | 0.51  | 1.77E-01 | 0.66  | 8.66E-02 | -0.02 | 9.83E-01 | -0.68 | 4.06E-02 |
| TPST2     | 0.12  | 9.09E-01 | 0.51  | 1.17E-01 | -0.71 | 3.84E-02 | 0.40  | 3.77E-01 | -0.83 | 1.42E-02 | -1.23 | 3.00E-04 |
| TRAF5     | 0.67  | 2.14E-01 | 0.50  | 1.98E-01 | -0.44 | 3.36E-01 | -0.18 | 8.07E-01 | -1.12 | 3.84E-03 | -0.94 | 1.03E-02 |
| TRIM16    | -0.04 | 9.65E-01 | 0.60  | 8.77E-03 | -0.45 | 8.40E-02 | 0.63  | 1.68E-02 | -0.41 | 1.15E-01 | -1.04 | 5.59E-05 |
| TRIM16L   | 0.12  | 8.58E-01 | 0.80  | 1.39E-03 | -0.41 | 1.58E-01 | 0.68  | 1.74E-02 | -0.53 | 4.82E-02 | -1.21 | 2.21E-05 |
| TRIP13    | -0.80 | 5.75E-01 | -0.85 | 3.13E-01 | 0.72  | 4.86E-01 | -0.05 | 9.85E-01 | 1.52  | 5.92E-02 | 1.57  | 3.88E-02 |
| TRPC4     | -0.60 | 1.50E-01 | -0.69 | 1.34E-02 | -1.82 | 1.15E-06 | -0.10 | 8.80E-01 | -1.22 | 1.71E-04 | -1.12 | 2.69E-04 |
| TRPS1     | 0.08  | 9.58E-01 | 0.06  | 9.41E-01 | 1.01  | 2.67E-02 | -0.02 | 9.87E-01 | 0.93  | 3.93E-02 | 0.95  | 2.60E-02 |
| TSHZ2     | 0.15  | 9.56E-01 | -0.49 | 6.11E-01 | 1.06  | 2.13E-01 | -0.64 | 5.85E-01 | 0.91  | 2.99E-01 | 1.55  | 3.25E-02 |
| TSPAN11   | -0.05 | 9.81E-01 | -0.76 | 1.54E-01 | 0.71  | 2.45E-01 | -0.71 | 2.97E-01 | 0.76  | 1.98E-01 | 1.46  | 4.54E-03 |
| TSPAN12   | 0.46  | 3.97E-01 | 1.12  | 7.44E-04 | -0.20 | 7.21E-01 | 0.66  | 9.13E-02 | -0.66 | 6.41E-02 | -1.32 | 2.03E-04 |
| TSPAN13   | 0.17  | 9.18E-01 | 0.88  | 7.94E-02 | -0.49 | 4.71E-01 | 0.72  | 2.79E-01 | -0.66 | 2.74E-01 | -1.38 | 6.61E-03 |
| TSPAN18   | -0.05 | 9.87E-01 | -1.49 | 5.82E-02 | -3.05 | 5.65E-04 | -1.43 | 1.35E-01 | -3.00 | 5.37E-04 | -1.57 | 5.16E-02 |
| TSPAN2    | 0.43  | 8.52E-01 | 0.79  | 4.36E-01 | -1.34 | 1.71E-01 | 0.37  | 8.35E-01 | -1.76 | 5.15E-02 | -2.13 | 1.22E-02 |
| TSPAN5    | 0.26  | 6.28E-01 | 0.53  | 4.72E-02 | 1.09  | 3.58E-04 | 0.27  | 5.29E-01 | 0.83  | 3.98E-03 | 0.56  | 4.07E-02 |
| TTK       | -0.89 | 5.93E-01 | -1.10 | 2.31E-01 | 0.84  | 4.70E-01 | -0.21 | 9.18E-01 | 1.73  | 5.92E-02 | 1.95  | 2.35E-02 |
| TUBB2A    | 0.56  | 2.52E-01 | 1.13  | 5.15E-04 | 0.71  | 4.23E-02 | 0.57  | 1.42E-01 | 0.14  | 7.99E-01 | -0.43 | 2.37E-01 |
| TUBB2A    | 0.56  | 2.52E-01 | 1.13  | 5.15E-04 | 0.71  | 4.23E-02 | 0.57  | 1.42E-01 | 0.14  | 7.99E-01 | -0.43 | 2.37E-01 |
| TUFT1     | 0.33  | 5.06E-01 | 0.53  | 5.28E-02 | -0.85 | 4.80E-03 | 0.20  | 6.83E-01 | -1.18 | 1.59E-04 | -1.38 | 1.45E-05 |
| TYMS      | -0.71 | 5.31E-01 | -1.54 | 1.01E-02 | 0.34  | 7.47E-01 | -0.83 | 3.23E-01 | 1.05  | 1.25E-01 | 1.88  | 2.76E-03 |
| UBE2C     | -0.28 | 8.24E-01 | -0.54 | 3.40E-01 | 0.75  | 2.05E-01 | -0.26 | 7.88E-01 | 1.03  | 5.53E-02 | 1.29  | 1.04E-02 |
| UCHL1     | 0.01  | 9.95E-01 | 0.39  | 3.79E-01 | -0.68 | 1.12E-01 | 0.38  | 5.30E-01 | -0.70 | 9.83E-02 | -1.07 | 5.66E-03 |
| UCK2      | 0.32  | 4.28E-01 | 1.11  | 3.09E-05 | 0.36  | 1.98E-01 | 0.79  | 3.96E-03 | 0.04  | 9.42E-01 | -0.75 | 2.23E-03 |
| UCP2      | 0.16  | 8.81E-01 | -0.30 | 5.06E-01 | 0.82  | 3.67E-02 | -0.46 | 3.54E-01 | 0.66  | 1.00E-01 | 1.12  | 2.49E-03 |
| ULBP1     | -0.21 | 9.07E-01 | -0.43 | 5.64E-01 | 1.93  | 1.92E-03 | -0.21 | 8.61E-01 | 2.14  | 5.56E-04 | 2.35  | 1.29E-04 |

|         |       |          |       |          |       |          |       |          |       |          |       |          |
|---------|-------|----------|-------|----------|-------|----------|-------|----------|-------|----------|-------|----------|
| UNC5B   | 0.20  | 8.82E-01 | 0.39  | 4.82E-01 | -0.67 | 1.94E-01 | 0.19  | 8.39E-01 | -0.87 | 7.04E-02 | -1.06 | 1.76E-02 |
| UQCR11  | -0.06 | 9.55E-01 | -0.36 | 2.24E-01 | -1.07 | 4.78E-04 | -0.30 | 4.60E-01 | -1.01 | 6.62E-04 | -0.71 | 9.37E-03 |
| USP18   | 0.34  | 6.60E-01 | 1.61  | 8.09E-05 | -0.03 | 9.75E-01 | 1.27  | 3.62E-03 | -0.37 | 4.75E-01 | -1.64 | 8.39E-05 |
| USP2    | -0.06 | 9.45E-01 | 0.01  | 9.82E-01 | 0.96  | 1.22E-03 | 0.08  | 9.02E-01 | 1.03  | 4.99E-04 | 0.95  | 7.22E-04 |
| USP53   | 0.14  | 9.30E-01 | 0.24  | 7.48E-01 | -1.16 | 2.49E-02 | 0.10  | 9.37E-01 | -1.30 | 1.10E-02 | -1.40 | 4.29E-03 |
| USP9Y   | -0.02 | 9.95E-01 | -0.02 | 9.89E-01 | 2.88  | 3.24E-05 | 0.00  | 1.00E+00 | 2.90  | 2.13E-05 | 2.90  | 1.43E-05 |
| UTY     | 0.12  | 9.18E-01 | -0.07 | 9.21E-01 | 1.46  | 3.48E-04 | -0.19 | 7.90E-01 | 1.33  | 6.75E-04 | 1.52  | 1.06E-04 |
| VCAM1   | 0.54  | 7.83E-01 | 0.83  | 3.85E-01 | -3.92 | 5.05E-05 | 0.29  | 8.74E-01 | -4.46 | 7.02E-06 | -4.75 | 2.30E-06 |
| VDR     | 0.05  | 9.52E-01 | 0.51  | 3.17E-02 | -0.85 | 1.49E-03 | 0.46  | 1.16E-01 | -0.91 | 6.58E-04 | -1.37 | 3.50E-06 |
| VGLL3   | 0.15  | 8.84E-01 | -0.08 | 8.96E-01 | -1.64 | 4.21E-05 | -0.23 | 7.11E-01 | -1.79 | 1.02E-05 | -1.56 | 3.64E-05 |
| VRK2    | 0.39  | 2.88E-01 | 0.48  | 4.04E-02 | 1.03  | 1.58E-04 | 0.09  | 8.68E-01 | 0.64  | 1.13E-02 | 0.55  | 2.11E-02 |
| WDR76   | -0.85 | 4.42E-01 | -1.33 | 3.46E-02 | 0.69  | 4.22E-01 | -0.49 | 6.60E-01 | 1.53  | 2.44E-02 | 2.02  | 2.14E-03 |
| WEE1    | -0.72 | 4.45E-01 | -1.33 | 1.28E-02 | 0.30  | 7.49E-01 | -0.61 | 4.52E-01 | 1.02  | 8.95E-02 | 1.63  | 3.52E-03 |
| WEE1    | -0.39 | 7.33E-01 | -0.84 | 1.10E-01 | 0.50  | 4.73E-01 | -0.45 | 5.93E-01 | 0.89  | 1.16E-01 | 1.34  | 9.44E-03 |
| WNT5A   | -0.25 | 8.67E-01 | -0.73 | 1.93E-01 | -1.38 | 1.54E-02 | -0.48 | 5.80E-01 | -1.13 | 4.69E-02 | -0.65 | 2.96E-01 |
| XAF1    | 0.26  | 8.04E-01 | 1.71  | 1.54E-04 | 0.42  | 4.77E-01 | 1.45  | 3.43E-03 | 0.16  | 8.44E-01 | -1.29 | 3.20E-03 |
| XPNPEP1 | -0.08 | 9.20E-01 | 0.25  | 3.46E-01 | -0.79 | 1.92E-03 | 0.33  | 2.89E-01 | -0.71 | 3.85E-03 | -1.04 | 5.34E-05 |
| ZADH2   | -0.06 | 9.44E-01 | -0.23 | 4.44E-01 | 0.95  | 5.45E-04 | -0.17 | 7.03E-01 | 1.01  | 2.25E-04 | 1.18  | 2.23E-05 |
| ZC3H12C | 0.08  | 9.35E-01 | -0.15 | 7.37E-01 | 1.68  | 6.23E-06 | -0.23 | 6.49E-01 | 1.60  | 9.20E-06 | 1.83  | 1.07E-06 |
| ZDHHC2  | 0.05  | 9.49E-01 | -0.49 | 1.51E-02 | 0.55  | 1.32E-02 | -0.54 | 2.19E-02 | 0.51  | 2.19E-02 | 1.05  | 1.31E-05 |
| ZEB1    | 0.33  | 5.83E-01 | -0.12 | 8.08E-01 | 0.93  | 5.98E-03 | -0.46 | 2.69E-01 | 0.60  | 7.89E-02 | 1.06  | 1.14E-03 |
| ZFP36   | 0.43  | 6.46E-01 | -0.06 | 9.42E-01 | 0.94  | 6.59E-02 | -0.50 | 4.87E-01 | 0.51  | 4.03E-01 | 1.01  | 3.37E-02 |
| ZFPM2   | 0.09  | 9.34E-01 | -0.10 | 8.72E-01 | 2.32  | 3.68E-07 | -0.19 | 7.70E-01 | 2.23  | 5.42E-07 | 2.42  | 1.01E-07 |
| ZFY     | 0.08  | 9.50E-01 | 0.06  | 9.24E-01 | 1.58  | 7.67E-05 | -0.02 | 9.87E-01 | 1.50  | 1.09E-04 | 1.52  | 5.79E-05 |
| ZNF267  | 0.28  | 7.24E-01 | 0.79  | 2.44E-02 | 1.02  | 8.27E-03 | 0.51  | 2.84E-01 | 0.74  | 5.48E-02 | 0.23  | 6.69E-01 |
| ZNF385D | 0.29  | 9.41E-01 | 0.34  | 8.64E-01 | 2.99  | 1.34E-02 | 0.05  | 9.88E-01 | 2.70  | 2.35E-02 | 2.65  | 1.94E-02 |
| ZNF415  | 0.00  | 9.98E-01 | -0.41 | 2.20E-01 | -1.03 | 2.19E-03 | -0.40 | 3.44E-01 | -1.03 | 1.95E-03 | -0.63 | 4.46E-02 |
| ZNF474  | 0.19  | 6.12E-01 | 1.28  | 4.85E-07 | -0.12 | 6.83E-01 | 1.09  | 1.76E-05 | -0.32 | 1.42E-01 | -1.40 | 6.82E-08 |
| ZNF521  | 0.23  | 9.50E-01 | 0.00  | 9.99E-01 | 2.14  | 5.13E-02 | -0.23 | 9.27E-01 | 1.91  | 8.29E-02 | 2.14  | 3.60E-02 |
| ZNF730  | -0.10 | 9.57E-01 | 0.06  | 9.55E-01 | 1.46  | 8.44E-03 | 0.16  | 8.95E-01 | 1.56  | 4.31E-03 | 1.41  | 6.99E-03 |

---
