# Supplementary material for: Identification of Pathways Mediating Growth Differentiation Factor5-Induced Tenogenic Differentiation in Human Bone Marrow Stromal Cells
Source: PubMed Central journal article supplement (PMC4631504; doi:10.1371/journal.pone.0140869), 2015-11-03
Supplement: pone.0140869.s012.pdf [file pone.0140869.s012.pdf]

**S8 Table. Pathways regulated by GDF5-induced tenogenesis in hMSC.**

| <b>Pathway regulated in hMSC at day 4 of 100 ng/ml GDF5 induction (Total= 8 pathways)</b>   |                                                                                       |                |
|---------------------------------------------------------------------------------------------|---------------------------------------------------------------------------------------|----------------|
| <b>Pathway name</b>                                                                         | <b>Genes involved</b>                                                                 | <b>p-value</b> |
| Cholesterol biosynthesis                                                                    | FDPS↑, SC4MOL↑, ERG1↑                                                                 | 3.603E-04      |
| Glycolysis and gluconeogenesis p.3 / Human version                                          | ENO↓, ENO2↓                                                                           | 6.822E-04      |
| Glycolysis and gluconeogenesis p.3                                                          | ENO↓, ENO2↓                                                                           | 6.822E-04      |
| Immune response_TREM1 signalling pathway                                                    | PI3K reg class IA↑, CCL2↑                                                             | 4.092E-03      |
| Immune response_IL-17 signalling pathways                                                   | PI3K reg class IA↑, CCL2↑                                                             | 4.229E-03      |
| Glycolysis and gluconeogenesis (short map)                                                  | ENO2↓                                                                                 | 5.096E-03      |
| Development_VEGF signaling via VEGFR2 - generic cascades                                    | PI3K reg class IA↑, CCL2↑                                                             | 8.143E-03      |
| Regulation of lipid metabolism_Insulin regulation of fatty acid methabolism                 | PI3K reg class IA↑, FADS2↑                                                            | 9.105E-03      |
| <b>Pathway regulated in hMSC at day 10 of 100 ng/ml GDF5 induction (Total= 21 pathways)</b> |                                                                                       |                |
| <b>Pathway name</b>                                                                         | <b>Genes involved</b>                                                                 | <b>p-value</b> |
| Cell cycle_Role of APC in cell cycle regulation                                             | PLK1↓, BUBR1↓, Aurora-A↓, Cyclin A↓, Cyclin B↓, Nek2A↓, Securin↓, APC↓, CDC18L(CDC6)↑ | 3.540E-10      |
| Cell cycle_The metaphase checkpoint                                                         | Survivin↓, Aurora-A↓, Nek2A↓, PLK1↓, BUBR1↓, AF15q14↓, CENP-F↓                        | 2.731E-08      |
| Cell cycle_Chromosome condensation in prometaphase                                          | Cyclin A↓, Cyclin B↓, CAP-G↓, Aurora-A↓, CAP-G/G2↓, Condensin↓, TOP2↓                 | 3.203E-07      |
| Cholesterol Biosynthesis                                                                    | IDI1↑, HMGCS1↑, HMDH↑, ERG1↑, FDPS↑, SC4MOL↑, SC5D↑                                   | 2.325E-04      |
| Cell cycle_Initiation of mitosis                                                            | PLK1↓, Wee1↓, FOXM1↓, Cyclin B2↓                                                      | 3.811E-04      |
| Immune response_Antiviral actions of Interferons                                            | OAS1↑, OAS2↑, OAS3↑, 2'-5'-oligoadenylate synthetase↑, MxA↑                           | 7.921E-04      |
| Cell cycle_Role of Nek in cell cycle regulation                                             | PI3K reg class IA↑, Nek2A↓, tubulin beta↑, Aurora-A↓                                  | 1.004E-03      |
| Cell cycle_Spindle assembly and chromosome separation                                       | Anaphase-promoting complex (APC)↓, Nek2A↓, Securin↓, Aurora-A↓                        | 1.130E-03      |
| Development_Angiopoietin - Tie2 signaling                                                   | Angiopoietin 3↑, PI3K reg class IA↑, Grb14↑, Survivin↓                                | 1.415E-03      |
| Development_TGF-beta-dependent induction of EMT via SMADs                                   | Endothelin-1↓, SMAD3↓, ID2↓, E-cadherin↑                                              | 1.415E-03      |
| Cytoskeleton remodeling_Keratin filaments                                                   | Tubulin beta↑, Keratin 14↑, Keratin 16↑, Keratin 17↑                                  | 1.575E-03      |
| Cell cycle_Regulation of G1/S transition (part 1)                                           | Anaphase-promoting complex (APC) ↓, PP2A regulatory↑, SMAD3↓, Cyclin A↓, CDK6↑        | 1.931E-03      |
| Cell cycle_Cell cycle (generic schema)                                                      | CDK6↑, CyclinA↓, Cyclin B↓                                                            | 3.038E-03      |

## S8 Table continued

|                                                               |                                                 |           |
|---------------------------------------------------------------|-------------------------------------------------|-----------|
| Immune response_NF-AT signaling and leukocyte interactions    | NF-AT1↑, cPAL2↑, Ca(II) channel↑, Eotaxin↑      | 3.914E-03 |
| Immune response_CCR3 signaling in eosinophils                 | Eotaxin↑, Eotaxin 3↑, Rac2↓, MyHC↑, Myosin II ↑ | 4.553E-03 |
| Arachidonic acid production                                   | FADS1↑, PA24A↑, cPLA2↑, PLA2↑                   | 5.290E-03 |
| DNA damage_ATM / ATR regulation of G2 / M checkpoint          | Wee1↓, Cyclin A↓, Cyclin B↓                     | 5.643E-03 |
| Cell cycle_Transition and termination of DNA replication      | Cyclin A↓, TOP1 alpha↓, TOP2↓                   | 6.966E-03 |
| Immune response_Innate immune response to RNA viral infection | TLR3↓, RIG-I↓, MDA-5↓                           | 6.966E-03 |
| Cell cycle_Role of SCF complex in cell cycle regulation       | APC↓, PLK1↓, Wee1↓                              | 7.690E-03 |
| Immune response_TREM1 signaling pathway                       | PI3K reg class IA↑, CCL2↑, NFATC2↑              | 9.488E-03 |

**Pathway regulated in tenocytes (Total= 18 pathways)**

| <b>Pathway name</b>                                                     | <b>Genes involved</b>                                                     | <b>p-value</b> |
|-------------------------------------------------------------------------|---------------------------------------------------------------------------|----------------|
| Immune response_Alternative complement pathway                          | C3↑, C3a↑, iC3b↑, C3c↑, C3dg↑, C3b↑, C5 convertase (C3bBb)↑, Clusterin↑   | 1.129E-07      |
| Immune response_Lectin induced complement pathway                       | C3↑, C3a↑, C3b↑, C3c↑, C3dg↑, iC3b↑, DAF↑, C5 convertase (C2aC4bC3b)↑     | 7.265E-07      |
| Immune response_Classical complement pathway                            | C3↑, C3a↑, C3b↑, C3c↑, C3dg↑, iC3b↑, DAF↑, C5 convertase (C2aC4bC3b)↑     | 1.166E-06      |
| Development_Regulation of epithelial-to-mesenchymal transition (EMT)    | HGF↓, WNT↓, Jagged1↓, TGF-beta 3↑, Endothelin-1↓, ENDRA↓, ACTA2 ↓         | 5.553E-05      |
| Immune response_MIF-mediated glucocorticoid regulation                  | I-kB↑, NFKBIA↑, IL-8↑, VCAM↓                                              | 3.282E-04      |
| Development_TGF-beta-dependent induction of EMT via SMADs               | Endothelin-1↓, TGF-beta↑, TGF-beta 3↑, Jagged1↓                           | 2.010E-03      |
| Transcription_Role of AP-1 in regulation of cellular metabolism         | ITGA2↑, TSG-6↑, GCL cat↑, GCL reg↑                                        | 2.733E-03      |
| Apoptosis and survival_Lymphotoxin-beta receptor signaling              | IL-8↑, I-kB↑, VCAM↓, SDF-1↓                                               | 3.951E-03      |
| Cell adhesion_Ephrin signaling                                          | Ephrin-B↓, Ephrin-B receptors↑, Ephrin-B receptor 1↑, Ephrin-A receptors↓ | 5.075E-03      |
| Immune response_PGE2 signaling in immune response                       | PGE2R2↑, PGES↓, IL-8↑, HGF↓                                               | 5.075E-03      |
| Development_TGF-beta-dependent induction of EMT via RhoA, PI3K and ILK. | TGF-beta 3↑, ACTA2↓, I-kB↑, Actin↓                                        | 5.492E-03      |
| Immune response_Histamine H1 receptor signaling in immune response      | IL-8↑, VCAM1↓, NFKBIA↑, I-kB↑                                             | 6.394E-03      |
| Muscle contraction_Relaxin signaling pathway                            | Endothelin-1↓, PDE4D↑, NFKBIA↑, I-kB↑                                     | 6.394E-03      |

S8 Table continued

|                                                                               |                                                   |           |
|-------------------------------------------------------------------------------|---------------------------------------------------|-----------|
| Development_PEDF signaling                                                    | PEDF (serpinF1)↑, NFKBIA↑, c-IAP2↑, BDNF↓         | 6.881E-03 |
| Development_Cross-talk between VEGF and Angiopoietin 1 signaling pathways     | VCAM1↓, I-kB↑, Angiopoietin 1↓                    | 7.347E-03 |
| Development_S1P2 and S1P3 receptors in cell proliferation and differentiation | ACTA2↓, Transgelin↓, Actin↓                       | 7.347E-03 |
| Immune response_HMGB1/RAGE signaling pathway                                  | VCAM1↓, I-kB↑, NFKBIA↑, IL-8↑                     | 9.068E-03 |
| Muscle contraction_GPCRs in the regulation of smooth muscle tone              | Endothelin-1↓, ENDRA↓, PGE2R2↑, MRLC↓, Myosin II↓ | 9.278E-03 |

---

**Pathway regulated in GDF5-induced hMSC (day 4 and day 10) (Total= 3 pathways)**


---

| Pathway name                                              | Change | <i>p</i> -value           |                            | Day 10 vs day 4 |
|-----------------------------------------------------------|--------|---------------------------|----------------------------|-----------------|
|                                                           |        | GDF5-induced hMSC (Day 4) | GDF5-induced hMSC (Day 10) |                 |
| Development_Angiopoietin - Tie2 signaling                 | +      | 5.622E-2                  | 1.415E-3                   | 8.316E-2        |
| Development_TGF-beta-dependent induction of EMT via SMADs | +      | 5.622E-2                  | 1.415E-3                   | 8.316E-2        |
| Immune response_IL-13 signaling via JAK-STAT              | +      | 7.019E-2                  | 2.393E-2                   | 5.175E-3        |

---

**Pathway regulated in GDF5-induced hMSC (day 4 and day 10) and tenocytes (Total= 11 pathways)**


---

| Pathway name                                              | Change | <i>p</i> -value           |                            | Tenocytes |
|-----------------------------------------------------------|--------|---------------------------|----------------------------|-----------|
|                                                           |        | GDF5-induced hMSC (Day 4) | GDF5-induced hMSC (Day 10) |           |
| Glycolysis and gluconeogenesis p.3 / Human version        | -      | 6.822E-4                  | 4.463E-2                   | 5.296E-2  |
| Glycolysis and gluconeogenesis p.3                        | -      | 6.822E-4                  | 4.463E-2                   | 5.296E-2  |
| Cell cycle_Role of Nek in cell cycle regulation           | +      | 5.152E-2                  | 1.004E-3                   | 8.790E-2  |
| Development_Angiopoietin - Tie2 signaling                 | +      | 5.622E-2                  | 1.415E-3                   | 1.024E-1  |
| Development_TGF-beta-dependent induction of EMT via SMADs | +      | 5.622E-2                  | 1.415E-3                   | 2.010E-3  |
| Immune response_TREM1 signaling pathway                   | +      | 4.092E-3                  | 9.488E-3                   | 1.313E-2  |
| Immune response_IL-17 signaling pathways                  | +      | 4.229E-3                  | 2.078E-1                   | 1.390E-2  |
| Glycolysis and gluconeogenesis (short map)                | -      | 5.096E-3                  | 6.630E-2                   | 2.738E-1  |
| Development_PEDF signaling                                | +      | 7.787E-2                  | 5.030E-1                   | 6.881E-3  |
| Development_VEGF signaling via VEGFR2 - generic cascades  | +      | 8.143E-3                  | 1.155E-1                   | 3.765E-1  |

S8 Table continued

|                                                                             |   |          |          |          |
|-----------------------------------------------------------------------------|---|----------|----------|----------|
| Regulation of lipid metabolism_Insulin regulation of fatty acid methabolism | + | 9.105E-3 | 3.592E-1 | 7.538E-1 |
|-----------------------------------------------------------------------------|---|----------|----------|----------|

---

**Pathway regulated in tenocytes compared to GDF5-induced hMSC (day 4 and day 10) (Total= 41 pathways)**


---

| Pathway name                                                              | Change | <i>p</i> -value           |                                       |                                         |
|---------------------------------------------------------------------------|--------|---------------------------|---------------------------------------|-----------------------------------------|
|                                                                           |        | Tenocytes vs control hMSC | Tenocytes vs GDF5-induced hMSC (Day4) | Tenocytes vs GDF5-induced hMSC (Day 10) |
| Cell cycle_Chromosome condensation in prometaphase                        | +      | 2.806E-1                  | 1.132E-7                              | 2.303E-12                               |
| Cell cycle_Role of APC in cell cycle regulation                           | +      | 3.948E-1                  | 1.365E-1                              | 1.134E-8                                |
| Cell cycle_Initiation of mitosis                                          | +      | 5.699E-2                  | 8.134E-6                              | 1.519E-8                                |
| Immune response_Alternative complement pathway                            | +      | 1.129E-7                  | 1.866E-1                              | 7.618E-4                                |
| Immune response_Lectin induced complement pathway                         | +      | 7.265E-7                  | 2.614E-1                              | 1.259E-2                                |
| Immune response_Classical complement pathway                              | +      | 1.166E-6                  | 2.840E-1                              | 1.602E-2                                |
| Development_TGF-beta-dependent induction of EMT via SMADs                 | +      | 2.010E-3                  | 1.576E-1                              | 4.825E-6                                |
| Development_Regulation of epithelial-to-mesenchymal transition (EMT)      | -      | 5.553E-5                  | 2.906E-4                              | 1.190E-5                                |
| Immune response_MIF-mediated glucocorticoid regulation                    | +      | 3.282E-4                  | 6.401E-5                              | 2.618E-5                                |
| Immune response_Histamine H1 receptor signaling in immune response        | +      | 6.394E-3                  | 4.521E-5                              | 2.313E-3                                |
| Cell adhesion_ECM remodeling                                              | +      | 4.671E-2                  | 7.675E-5                              | 6.418E-4                                |
| Cell cycle_Role of Nek in cell cycle regulation                           | +      | 8.790E-2                  | 1.365E-1                              | 2.501E-4                                |
| DNA damage_ATM/ATR regulation of G1/S checkpoint                          | +      | 3.948E-1                  | 1.365E-1                              | 2.501E-4                                |
| Cell cycle_Sister chromatid cohesion                                      | +      | 2.918E-1                  | 9.471E-3                              | 3.251E-4                                |
| GTP metabolism                                                            | -      | 5.128E-2                  | 7.298E-4                              | 6.803E-2                                |
| Transcription_Role of AP-1 in regulation of cellular metabolism           | +      | 2.733E-3                  | 9.389E-4                              | 2.968E-1                                |
| Cell cycle_Role of SCF complex in cell cycle regulation                   | +      | 3.656E-1                  | 4.481E-1                              | 1.245E-3                                |
| Apoptosis and survival_Lymphotoxin-beta receptor signaling                | +      | 3.951E-3                  | 1.491E-3                              | 1.179E-1                                |
| Transcription_Role of VDR in regulation of genes involved in osteoporosis | -      | 6.889E-2                  | 3.513E-1                              | 1.683E-3                                |
| Immune response_IL-1 signaling pathway                                    | +      | 3.059E-2                  | 1.842E-3                              | 1.306E-1                                |
| Development_TGF-beta-dependent induction of EMT via RhoA, PI3K and ILK.   | +      | 5.492E-3                  | 6.578E-2                              | 1.851E-3                                |

## S8 Table continued

|                                                                               |   |          |          |           |
|-------------------------------------------------------------------------------|---|----------|----------|-----------|
| Development_NOTCH1-mediated pathway for NF-KB activity modulation             | + | 1.546E-2 | 4.689E-3 | 2.597E-3  |
| Immune response_Gastrin in inflammatory response                              | + | 2.216E-2 | 2.639E-3 | 1.348E-1  |
| Immune response_HMGB1/RAGE signaling pathway                                  | + | 9.068E-3 | 4.206E-3 | 1.729E-2  |
| Cell adhesion_Cell-matrix glycoconjugates                                     | + | 1.174E-1 | 4.104E-2 | 4.270E-3  |
| Airway smooth muscle contraction in asthma                                    | - | 5.606E-2 | 1.041E-1 | 5.062E-3  |
| Cell adhesion_Ephrin signaling                                                | + | 5.075E-3 | 1.269E-2 | 3.898E-2  |
| Immune response_PGE2 signaling in immune response                             | + | 5.075E-3 | 1.269E-2 | 1.372E-1  |
| Immune response_Role of PKR in stress-induced antiviral cell response         | + | 5.853E-2 | 5.753E-3 | 2.229E-1  |
| Cell adhesion_Tight junctions                                                 | + | 1.803E-2 | 5.772E-3 | 2.754E-1  |
| Cell adhesion_Cadherin-mediated cell adhesion                                 | + | 6.113E-2 | 1.507E-2 | 5.953E-3  |
| Muscle contraction_Delta-type opioid receptor in smooth muscle contraction    | - | 6.113E-2 | 1.507E-2 | 5.953E-3  |
| Development_S1P2 and S1P3 receptors in cell proliferation and differentiation | - | 7.347E-3 | 1.507E-2 | 5.953E-3  |
| Muscle contraction_Relaxin signaling pathway                                  | + | 6.394E-3 | 1.582E-2 | 1.574E-1  |
| Development_PEDF signaling                                                    | + | 6.881E-3 | 6.341E-1 | 5.080E-2  |
| Immune response_IL-17 signaling pathways                                      | + | 1.390E-2 | 7.148E-3 | 2.804E-2  |
| Development_Cross-talk between VEGF and Angiopoietin 1 signaling pathways     | + | 7.347E-3 | 1.507E-2 | 3.704E-2  |
| Cell adhesion_PLAU signaling                                                  | + | 1.226E-1 | 7.691E-3 | 2.455E-2  |
| Transport_Macropinocytosis regulation by growth factors                       | + | 7.437E-2 | 3.841E-2 | 8.979E-3  |
| Muscle contraction_GPCRs in the regulation of smooth muscle tone              | - | 9.278E-3 | 2.627E-2 | 9.435E-3  |
| Apoptosis and survival_Granzyme A signaling                                   | + | 3.755E-1 | 2.220E-2 | 9.983E-3  |
| Cell cycle_Chromosome condensation in prometaphase                            | + | 2.806E-1 | 1.132E-7 | 2.303E-12 |

---

↑ Up-regulated; ↓ Down-regulated
